# Supplementary material for: Stereoselective synthesis of fluoroalkylated (Z)-alkene via nickel-catalyzed and iron-mediated hydrofluoroalkylation of alkynes
Source: Royal Society of Chemistry journal article supplement (doi:10.1039/d1qo00983d), 2021-01-01

## Supporting Information

### **Stereoselective synthesis of fluoroalkylated (*Z*)-alkene via nickel-catalyzed and iron-mediated hydrofluoroalkylation of alkynes**

Xiang-Rui Li,<sup>a</sup> Wen-Xin Li,<sup>a</sup> Zhuo-Wen Zhang,<sup>a</sup> Chuanji Shen,<sup>b</sup> Xiaocong Zhou,<sup>\*b</sup>  
Xue-Qiang Chu,<sup>a</sup> Weidong Rao,<sup>c</sup> Zhi-Liang Shen<sup>\*a</sup>

<sup>a</sup> Technical Institute of Fluorochemistry (TIF), Institute of Advanced Synthesis, School of Chemistry and Molecular Engineering, Nanjing Tech University, Nanjing 211816, China. E-mail: ias\_zlshen@njtech.edu.cn.

<sup>b</sup> College of Biological, Chemical Science and Engineering, Jiaying University, 118 Jiahang Road, Jiaying 314001, China. E-mail: xczhou@zjxu.edu.cn.

<sup>c</sup> Jiangsu Provincial Key Lab for the Chemistry and Utilization of Agro-Forest Biomass, College of Chemical Engineering, Nanjing Forestry University, Nanjing 210037, China.

#### **Table of Contents**

|                                                                                   |          |
|-----------------------------------------------------------------------------------|----------|
| General information.....                                                          | page S2  |
| Optimization of reaction conditions.....                                          | page S2  |
| Tentatively proposed reaction mechanism.....                                      | page S3  |
| Synthesis of starting materials.....                                              | page S3  |
| Experimental procedure.....                                                       | page S6  |
| Control experiments.....                                                          | page S6  |
| Characterization data of products.....                                            | page S9  |
| References.....                                                                   | page S18 |
| <sup>1</sup> H, <sup>13</sup> C, and <sup>19</sup> F NMR spectra of products..... | page S19 |

## General information

Analytical thin layer chromatography (TLC) was performed using silica gel plate (0.2 mm thickness). Subsequent to elution, plates were visualized using UV radiation (254 nm). Flash chromatography was performed using Merck silica gel (200-300 mesh) for column chromatography with freshly distilled solvents. Columns were typically packed as slurry and equilibrated with the appropriate solvent system prior to use. IR spectra were recorded on a FT-IR spectrophotometer using KBr optics.  $^1\text{H}$ ,  $^{19}\text{F}$ , and  $^{13}\text{C}$  NMR spectra were recorded in  $\text{CDCl}_3$  on Bruker Avance or Jeol 400 MHz spectrometers. Tetramethylsilane (TMS) served as internal standard for  $^1\text{H}$ ,  $^{19}\text{F}$ , and  $^{13}\text{C}$  NMR analysis. High resolution mass spectra (HRMS) were obtained using a commercial apparatus (ESI or EI Source).

## Optimization of reaction conditions

**Table S1. Optimization of Reaction Conditions by Using Different Solvents<sup>a</sup>**

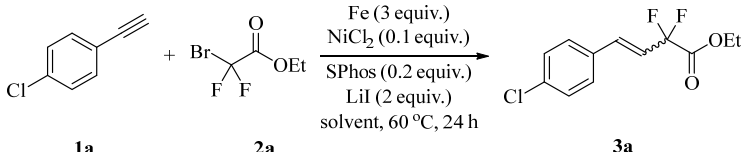

| entry    | solvent     | yield (%) <sup>b</sup> |
|----------|-------------|------------------------|
| 1        | MeCN        | trace                  |
| 2        | DMA         | 72 <sup>c</sup>        |
| 3        | Toluene     | trace                  |
| <b>4</b> | <b>DMF</b>  | <b>77<sup>c</sup></b>  |
| 5        | DMSO        | 46 <sup>c</sup>        |
| 6        | 1,4-dioxane | 21 <sup>c</sup>        |
| 7        | DCE         | 15 <sup>c</sup>        |

<sup>a</sup> The reactions were performed at 60 °C for 24 h by using alkyne **1a** (0.5 mmol), ethyl 2-bromo-2,2-difluoroacetate (**2a**, 1.5 mmol), Fe (1.5 mmol),  $\text{NiCl}_2$  (0.1 equiv.), SPhos (0.2 equiv.), and LiI (2 equiv.) in solvent (2 mL). <sup>b</sup> Yields were determined by NMR analysis of crude reaction mixture after work-up by using 1,4-dimethoxybenzene as an internal standard. <sup>c</sup>  $Z/E = 70:30$ .

**Table S2. Optimization of Reaction Conditions by Using Different Metals<sup>a</sup>**

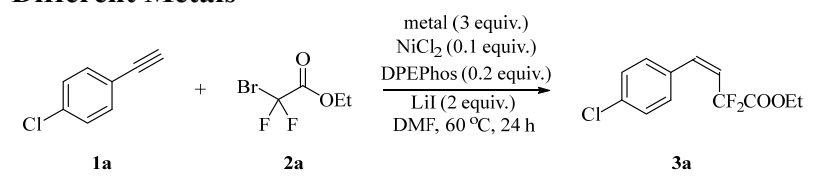

| entry    | metal     | yield (%) <sup>b</sup> |
|----------|-----------|------------------------|
| 1        | In        | 10                     |
| 2        | Cr        | trace                  |
| 3        | Mn        | trace                  |
| 4        | Zn        | 23                     |
| 5        | Mg        | trace                  |
| <b>6</b> | <b>Fe</b> | <b>86</b>              |

<sup>a</sup> Unless otherwise noted, the reactions were performed at 100 °C for 24 h by using 1-chloro-4-ethynylbenzene (**1a**, 1 mmol), ethyl 2-bromo-2,2-difluoroacetate (**2a**, 3 mmol), metal (3 mmol), NiCl<sub>2</sub> (0.1 equiv.), DPEPhos (0.2 equiv.), and LiI (2 equiv.) in DMF (2 mL). <sup>b</sup> Yields were determined by NMR analysis of crude reaction mixture after work-up by using 1,4-dimethoxybenzene as an internal standard.

### Tentatively proposed reaction mechanism

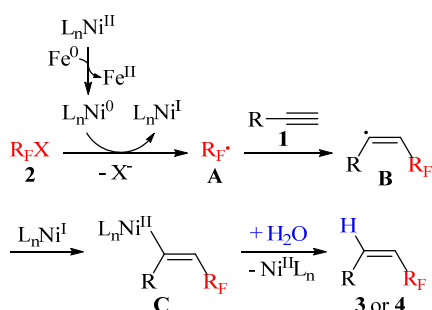

**Figure S1.** Tentatively proposed preliminary reaction mechanism.

### Synthesis of starting materials

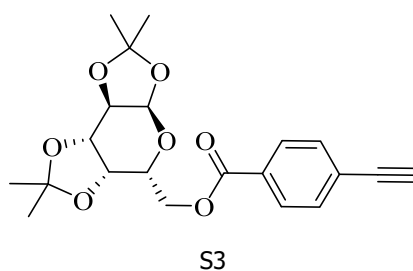

**((3*aR*,5*R*,5*aS*,8*aS*,8*bR*)-2,2,7,7-Tetramethyltetrahydro-5*H*-bis([1,3]dioxolo)[4,5-*b*:4',5'-*d*]pyran-5-yl)methanol (5a):** This compound was synthesized according to the described procedure by using 1,2:3,4-di-*O*-isopropylidene-*D*-galactopyranose (828 mg, 3.18 mmol) and 4-ethynylbenzoic acid (520 mg, 3.56 mmol).<sup>2</sup> White solid, 1.07 g, 87% yield. <sup>1</sup>H NMR (400 MHz, CDCl<sub>3</sub>): δ 8.00 (d, *J* = 8.6 Hz, 2H), 7.54 (d, *J* = 8.3 Hz, 2H), 5.57 (d, *J* = 5.0 Hz, 1H), 4.65 (dd, *J* = 7.9, 2.5 Hz, 1H), 4.53 (dd, *J* = 11.6, 4.8 Hz, 1H), 4.43 (dd, *J* = 11.5, 7.6 Hz, 1H), 4.35 (dd, *J* = 5.0, 2.5 Hz, 1H), 4.32 (dd, *J* = 7.8, 1.9 Hz, 1H), 4.17 (ddd, *J* = 7.1, 4.8, 2.0 Hz, 1H), 3.23 (s, 1H), 1.51 (s, 3H), 1.47 (s, 3H), 1.35 (s, 3H), 1.33 (s, 3H) ppm. <sup>13</sup>C NMR (100 MHz, CDCl<sub>3</sub>): δ 165.7, 132.0, 129.9, 129.5, 126.8, 109.7, 108.8, 96.3, 82.8, 80.1, 71.1, 70.6, 70.4, 66.0, 64.1, 26.0, 25.9, 24.9, 24.4 ppm.

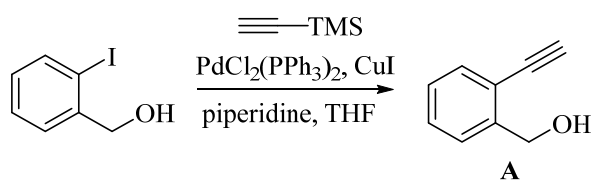

**(2-Ethynylphenyl)methanol (A):** This compound was synthesized according to the described procedure by using (2-iodophenyl)methanol and ethynyltrimethylsilane.<sup>3</sup>

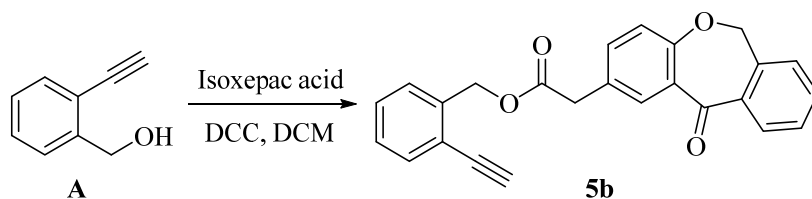

**2-Ethynylbenzyl 2-(11-oxo-6,11-dihydrodibenzo[*b,e*]oxepin-2-yl) acetate (5b):** This compound was synthesized according to the described procedure by using Isoxepac acid (805 mg, 3.0 mmol), (2-ethynylphenyl)methanol (396 mg, 3.0 mmol), DCC (929 mg, 4.5 mmol) and DMAP (37 mg, 0.3 mmol) in DCM (10 mL) at rt for 6 h.<sup>4</sup> White solid, 975 mg, 85% yield. <sup>1</sup>H NMR (400 MHz, CDCl<sub>3</sub>): 8.14 (d, *J* = 2.3 Hz, 1H), 7.89 (d, *J* = 7.7 Hz, 1H), 7.58–7.44 (m, 4H), 7.38–7.34 (m, 3H), 7.33–7.27 (m, 1H), 7.03 (d, *J* = 8.4 Hz, 1H), 5.32 (s, 2H), 5.19 (s, 2H), 3.72 (s, 2H), 3.31 (s, 1H) ppm. <sup>13</sup>C NMR (100 MHz, CDCl<sub>3</sub>): δ 190.9, 171.2, 160.5, 140.4, 137.8, 136.4, 135.5, 132.9, 132.8, 132.5, 129.4, 129.3, 129.0, 128.3, 128.1, 127.8, 127.6, 125.1, 121.5, 121.0, 82.3, 80.7, 73.6, 65.0, 40.1 ppm.

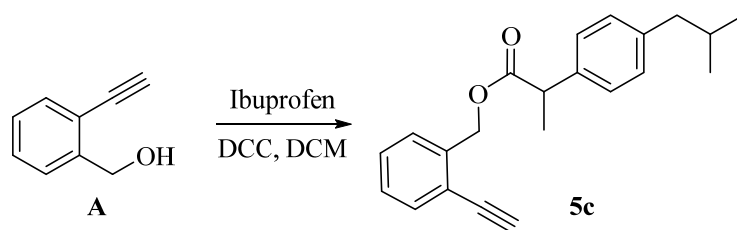

**2-Ethynylbenzyl 2-(4-isobutylphenyl) propanoate (5c):** This compound was synthesized according to the described procedure by using Ibuprofen acid (619 mg, 3.0 mmol), (2-ethynylphenyl)methanol (396 mg, 3.0 mmol), DCC (929 mg, 4.5 mmol) and DMAP (37 mg, 0.3 mmol) in DCM (10 mL) at rt for 6 h.<sup>4</sup> White solid, 874 mg, 91% yield. <sup>1</sup>H NMR (400 MHz, CDCl<sub>3</sub>): 7.50–7.46 (m, 1H), 7.26–7.21 (m, 4H), 7.19–7.15 (m, 1H), 7.11–7.08 (m, 2H), 5.28 (s, 2H), 3.79 (q, *J* = 7.2 Hz, 1H), 3.21 (s, 1H), 2.45 (d, *J* = 7.1 Hz, 2H), 1.84 (dt, *J* = 13.6, 6.8 Hz, 1H), 1.53 (d, *J* = 7.1 Hz, 3H), 0.91 (s, 3H), 0.89 (s, 3H) ppm. <sup>13</sup>C NMR (100 MHz, CDCl<sub>3</sub>): δ 174.4, 140.6, 138.3, 137.5, 132.7, 129.3, 128.9, 127.7, 127.5, 127.3, 121.0, 82.2, 80.7, 64.6, 45.1, 45.0, 30.2, 22.4, 18.4 ppm.

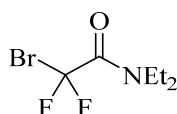

**2-Bromo-N,N-diethyl-2,2-difluoroacetamide (2b):** This compound was synthesized using ethyl 2-bromo-2,2-difluoroacetate and diethylamine according to the described procedure.<sup>5</sup> Colorless oil. <sup>1</sup>H NMR (400 MHz, CDCl<sub>3</sub>): δ 3.52 (qt, *J* = 7.1, 1.6 Hz, 2H), 3.42 (q, *J* = 7.1 Hz, 2H), 1.24 (t, *J* = 7.1 Hz, 3H), 1.19 (t, *J* = 7.1 Hz, 3H) ppm. <sup>13</sup>C NMR (100 MHz, CDCl<sub>3</sub>): δ 158.6 (t, *J* = 26.2 Hz), 111.1 (t, *J* = 314.6 Hz), 42.8 (t, *J* = 3.8 Hz), 42.0, 13.8, 11.8 ppm. <sup>19</sup>F NMR (376 MHz, CDCl<sub>3</sub>): δ -54.33 (s, 2F) ppm.

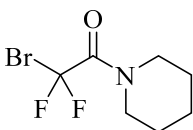

**2-Bromo-2,2-difluoro-1-(piperidin-1-yl)ethan-1-one (2c):** This compound was synthesized using ethyl 2-bromo-2,2-difluoroacetate and piperidine according to the described procedure.<sup>5</sup> Colorless oil. <sup>1</sup>H NMR (400 MHz, CDCl<sub>3</sub>): δ 3.63–3.60 (m, 4H), 1.72–1.61 (m, 6H) ppm. <sup>13</sup>C NMR (100 MHz, CDCl<sub>3</sub>): δ 157.8 (t, *J* = 27.3 Hz), 111.3 (t, *J* = 315.1 Hz), 47.9, 47.5 (t, *J* = 4.6 Hz), 26.4 (t, *J* = 1.6 Hz), 23.3 ppm. <sup>19</sup>F NMR (376 MHz, CDCl<sub>3</sub>): δ -53.76 (s, 2F) ppm.

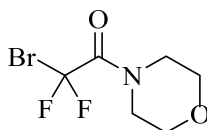

**2-Bromo-2,2-difluoro-1-morpholinoethan-1-one (2d):** This compound was synthesized using ethyl 2-bromo-2,2-difluoroacetate and morpholine according to the described procedure.<sup>6</sup> Colorless oil. <sup>1</sup>H NMR (400 MHz, CDCl<sub>3</sub>): δ 3.77–3.68 (m, 8H) ppm. <sup>13</sup>C NMR (100 MHz, CDCl<sub>3</sub>): δ 157.6 (t, *J* = 26.4 Hz), 110.2 (t, *J* = 314.6 Hz), 66.3, 65.9, 47.1 (t, *J* = 4.0 Hz), 43.6 ppm. <sup>19</sup>F NMR (376 MHz, CDCl<sub>3</sub>): δ -54.40 (s, 2F) ppm.

## Experimental procedure

### Typical procedures for the reaction for the synthesis of fluoroalkylated (*Z*)-alkene compounds

To a 10 mL Schlenk flask was added DMF (2 mL) and iron powder (168 mg, 3.0 mmol), and the iron powder was sequentially activated by using 1,2-dibromoethane (0.15 mmol) and TMSCl (0.15 mmol). After cooling down, alkyne (1.0 mmol), halofluoroacetate (or fluoroalkylated halides) (3.0 mmol), NiCl<sub>2</sub> (13 mg, 0.1 mmol), DPEPhos (108 mg, 0.2 mmol), and LiI (266 mg, 2.0 mmol) were added. The reaction mixture was vigorously stirred at 60 °C or 100 °C for 24 h under nitrogen atmosphere, followed by quenching with sat. NH<sub>4</sub>Cl solution (20 mL) and extracting with ethyl acetate (20 mL x 3). The combined extracts were washed with brine (20 mL), dried over anhydrous Na<sub>2</sub>SO<sub>4</sub> and concentrated *in vacuo*. Purification by silica gel column chromatography using ethyl acetate/petroleum ether as eluent gave the analytically pure product.

## Control experiments

### Scheme 4a:

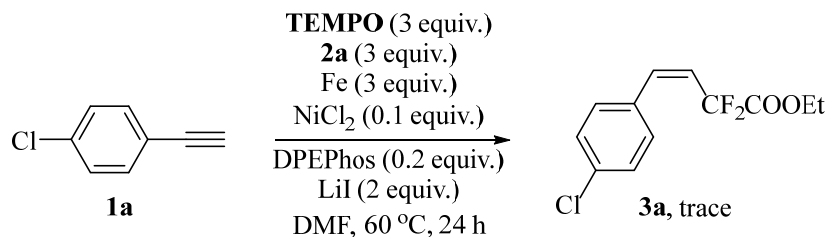

To a 10 mL Schlenk flask was added DMF (2 mL) and iron powder (168 mg, 3.0 mmol), and the iron powder was sequentially activated by using 1,2-dibromoethane (0.15 mmol) and TMSCl (0.15 mmol). After cooling down, alkyne **1a** (137 mg, 1.0 mmol), halofluoroacetate **2a** (609 mg, 3.0 mmol), NiCl<sub>2</sub> (13 mg, 0.1 mmol), DPEPhos (108 mg, 0.2 mmol), LiI (266 mg, 2.0 mmol), and TEMPO (469 mg, 3.0 mmol) were added. The reaction mixture was vigorously stirred at 60 °C for 24 h under nitrogen atmosphere, followed by quenching with sat. NH<sub>4</sub>Cl solution (20 mL) and extracting with ethyl acetate (20 mL x 3). The combined extracts were washed with brine (20 mL), dried over anhydrous Na<sub>2</sub>SO<sub>4</sub> and concentrated *in vacuo*. TLC analysis and crude <sup>1</sup>H NMR analysis showed that almost no product **3a** was formed in the reaction.

### Scheme 4b:

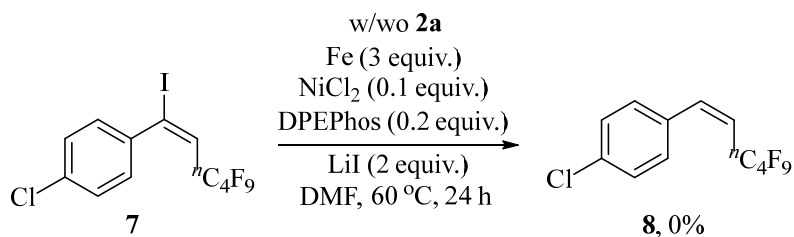

To a 10 mL Schlenk flask was added DMF (2 mL) and iron powder (168 mg, 3.0 mmol), and the iron powder was sequentially activated by using 1,2-dibromoethane (0.15 mmol) and TMSCl (0.15 mmol). After cooling down, alkenyl iodide **7** (483 mg, 1.0 mmol), NiCl<sub>2</sub> (13 mg, 0.1 mmol), DPEPhos (108 mg, 0.2 mmol), LiI (266 mg, 2.0 mmol), with or without halofluoroacetate **2a** (609 mg, 3.0 mmol), were added. The reaction mixture was vigorously stirred at 60 °C for 24 h under nitrogen atmosphere, followed by quenching with sat. NH<sub>4</sub>Cl solution (20 mL) and extracting with ethyl acetate (20 mL x 3). The combined extracts were washed with brine (20 mL), dried over anhydrous Na<sub>2</sub>SO<sub>4</sub> and concentrated *in vacuo*. Crude <sup>1</sup>H NMR analysis and further purification by silica gel column chromatography using ethyl acetate/petroleum ether as eluent showed that no desired product **8** was formed in the reaction.

#### Scheme 4c:

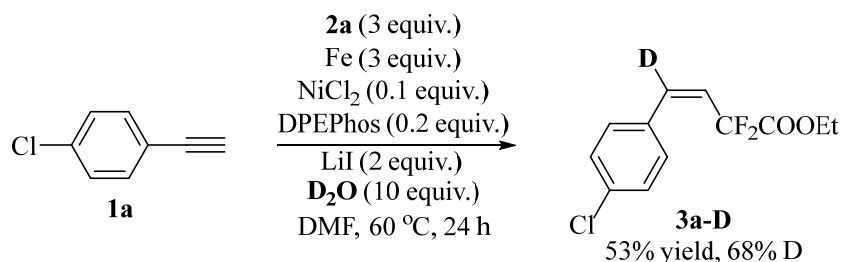

To a 10 mL Schlenk flask was added DMF (2 mL) and iron powder (168 mg, 3.0 mmol), and the iron powder was sequentially activated by using 1,2-dibromoethane (0.15 mmol) and TMSCl (0.15 mmol). After cooling down, alkyne **1a** (137 mg, 1.0 mmol), halofluoroacetate **2a** (609 mg, 3.0 mmol), NiCl<sub>2</sub> (13 mg, 0.1 mmol), DPEPhos (108 mg, 0.2 mmol), LiI (266 mg, 2.0 mmol), and D<sub>2</sub>O (200 mg, 10.0 mmol) were added. The reaction mixture was vigorously stirred at 60 °C for 24 h under nitrogen atmosphere, followed by quenching with sat. NH<sub>4</sub>Cl solution (20 mL) and extracting with ethyl acetate (20 mL x 3). The combined extracts were washed with brine (20 mL), dried over anhydrous Na<sub>2</sub>SO<sub>4</sub> and concentrated *in vacuo*. Purification by silica gel column chromatography using ethyl acetate/petroleum ether as eluent gave the product **3a-D** (138.2 mg, 53% yield) with 68% deuteration.

<sup>1</sup>H NMR spectrum of product **3a-D**:

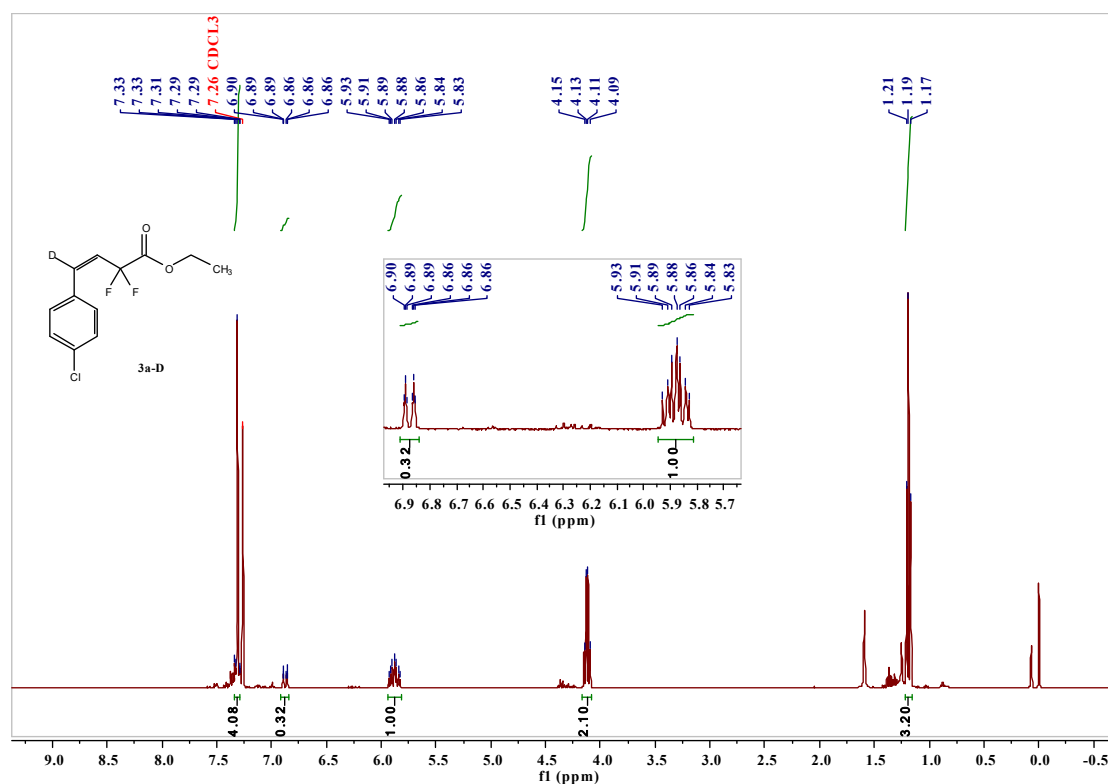

#### Scheme 4d:

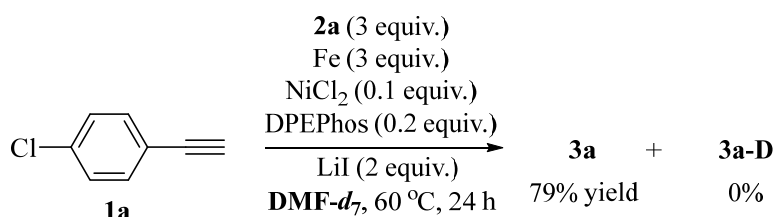

To a 10 mL Schlenk flask was added deuterated DMF-*d*<sub>7</sub> (2 mL) and iron powder (168 mg, 3.0 mmol), and the iron powder was sequentially activated by using 1,2-dibromoethane (0.15 mmol) and TMSCl (0.15 mmol). After cooling down, alkyne **1a** (137 mg, 1.0 mmol), halofluoroacetate **2a** (609 mg, 3.0 mmol), NiCl<sub>2</sub> (13 mg, 0.1 mmol), DPEPhos (108 mg, 0.2 mmol), and LiI (266 mg, 2.0 mmol) were added. The reaction mixture was vigorously stirred at 60 °C for 24 h under nitrogen atmosphere, followed by quenching with sat. NH<sub>4</sub>Cl solution (20 mL) and extracting with ethyl acetate (20 mL x 3). The combined extracts were washed with brine (20 mL), dried over anhydrous Na<sub>2</sub>SO<sub>4</sub> and concentrated *in vacuo*. Purification by silica gel column chromatography using ethyl acetate/petroleum ether as eluent gave the analytically pure product **3a** (205.9 mg, 79% yield); no any deuterated product **3a-D** was isolated in the reaction.



## Characterization data of products

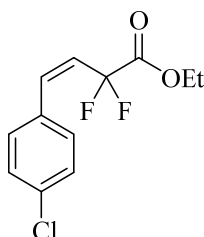

**Ethyl (Z)-4-(4-chlorophenyl)-2,2-difluorobut-3-enoate (3a):** 224.2 mg, 86% yield, colorless oil;  $^1\text{H NMR}$  (400 MHz,  $\text{CDCl}_3$ ):  $\delta$  7.34–7.28 (m, 4H), 6.88 (dd,  $J = 12.6, 2.1$  Hz, 1H), 5.88 (q,  $J = 13.3$  Hz, 1H), 4.12 (q,  $J = 7.1$  Hz, 2H), 1.19 (t,  $J = 7.2$  Hz, 3H) ppm.  $^{13}\text{C NMR}$  (100 MHz,  $\text{CDCl}_3$ ):  $\delta$  163.3 (t,  $J = 33.8$  Hz), 137.4 (t,  $J = 8.4$  Hz), 134.7, 132.6–132.5 (m), 130.3 (t,  $J = 3.0$  Hz), 128.4, 122.3 (t,  $J = 27.6$  Hz), 112.1 (t,  $J = 245.6$  Hz), 63.1, 13.6 ppm.  $^{19}\text{F NMR}$  (376 MHz,  $\text{CDCl}_3$ ):  $\delta$  -94.85 (s, 1F), -94.89 (s, 1F) ppm. IR (KBr):  $\nu = 3411, 2985, 1768, 1493, 1153, 1094, 844$   $\text{cm}^{-1}$ . HRMS (m/z): calcd for  $\text{C}_{12}\text{H}_{12}\text{ClF}_2\text{O}_2$   $[\text{M}+\text{H}]^+$  261.0488, found: 261.0494.

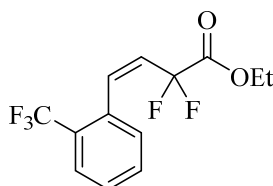

**Ethyl (Z)-2,2-difluoro-4-(2-(trifluoromethyl)phenyl)but-3-enoate (3b):** 203.0 mg, 69% yield, yellow oil;  $^1\text{H NMR}$  (400 MHz,  $\text{CDCl}_3$ ):  $\delta$  7.63–7.53 (m, 3H), 7.49 (d,  $J = 7.8$  Hz, 1H), 6.96 (dt,  $J = 12.7, 2.1$  Hz, 1H), 5.96 (q,  $J = 13.3$  Hz, 1H), 4.12 (q,  $J = 7.2$  Hz, 2H), 1.20 (t,  $J = 7.1$  Hz, 3H) ppm.  $^{13}\text{C NMR}$  (100 MHz,  $\text{CDCl}_3$ ):  $\delta$  163.2 (t,  $J = 33.5$  Hz), 137.1 (t,  $J = 8.2$  Hz), 135.1 (t,  $J = 1.3$  Hz), 132.2 (tt,  $J = 3.2, 1.5$  Hz), 130.8, 130.5, 128.7, 125.6 (q,  $J = 4.2$  Hz), 125.3 (q,  $J = 4.5$  Hz), 123.5 (t,  $J = 27.5$  Hz), 112.0 (t,  $J = 247.6$  Hz), 63.2, 13.6 ppm.  $^{19}\text{F NMR}$  (376 MHz,  $\text{CDCl}_3$ ):  $\delta$  -62.74 (s, 3F), -95.57 (d,  $J = 13.6$  Hz, 2F) ppm. IR (KBr):  $\nu = 3414, 2989, 1769, 1617, 1331, 1129, 700$   $\text{cm}^{-1}$ . HRMS (m/z): calcd for  $\text{C}_{13}\text{H}_{12}\text{F}_5\text{O}_2$   $[\text{M}+\text{H}]^+$  295.0752, found: 295.0757.

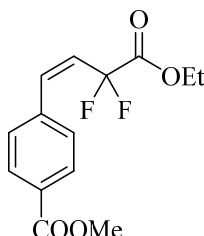

**Methyl (Z)-3-(4-ethoxy-3,3-difluoro-4-oxobut-1-en-1-yl)benzoate (3c):** 213.1 mg, 75% yield, colorless oil;  $^1\text{H NMR}$  (400 MHz,  $\text{CDCl}_3$ ):  $\delta$  8.00 (d,  $J = 8.2$  Hz, 2H), 7.41 (d,  $J = 8.2$  Hz, 2H), 6.96 (dd,  $J = 12.6, 2.2$  Hz, 1H), 5.95 (q,  $J = 13.1$  Hz, 1H), 4.08 (q,  $J = 7.1$  Hz, 2H), 3.91 (s, 3H), 1.16 (t,  $J = 7.1$  Hz, 3H) ppm.  $^{13}\text{C NMR}$  (100 MHz,  $\text{CDCl}_3$ ):  $\delta$  166.5, 163.2 (t,  $J = 33.7$  Hz), 138.7 (d,  $J = 1.7$  Hz), 137.6 (t,  $J = 8.5$  Hz), 130.0, 129.3, 128.8 (t,  $J = 3.1$  Hz), 123.4 (t,  $J = 27.7$  Hz), 112.0 (t,  $J = 274.1$  Hz), 63.1,

52.2, 13.6 ppm.  $^{19}\text{F}$  NMR (376 MHz,  $\text{CDCl}_3$ ):  $\delta$  -94.98 (d,  $J = 1.5$  Hz, 1F), -95.01 (d,  $J = 1.8$  Hz, 1F) ppm. IR (KBr):  $\nu = 3411, 1769, 1724, 1284, 1194, 1074, 777$   $\text{cm}^{-1}$ . HRMS (m/z): calcd for  $\text{C}_{14}\text{H}_{15}\text{F}_2\text{O}_4$   $[\text{M}+\text{H}]^+$  285.0933, found: 285.0938.

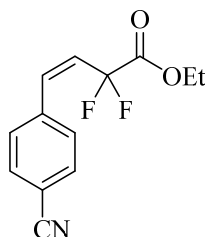

**Ethyl (Z)-4-(4-cyanophenyl)-2,2-difluorobut-3-enoate (3d):** 178.4 mg, 71% yield, colorless oil;  $^1\text{H}$  NMR (400 MHz,  $\text{CDCl}_3$ ):  $\delta$  7.64 (d,  $J = 8.1$  Hz, 2H), 7.46 (d,  $J = 8.1$  Hz, 2H), 6.94 (dt,  $J = 12.8, 2.2$  Hz, 1H), 5.99 (td,  $J = 13.7, 12.7$  Hz, 1H), 4.18 (q,  $J = 7.2$  Hz, 2H), 1.23 (t,  $J = 7.1$  Hz, 3H) ppm.  $^{13}\text{C}$  NMR (100 MHz,  $\text{CDCl}_3$ ):  $\delta$  163.1 (t,  $J = 33.6$  Hz), 138.7 (t,  $J = 1.4$  Hz), 136.7 (t,  $J = 7.8$  Hz), 131.8, 129.4 (t,  $J = 3.2$  Hz), 124.1 (t,  $J = 27.1$  Hz), 118.4, 112.1, 111.8 (t,  $J = 248.2$  Hz), 63.2, 13.7 ppm.  $^{19}\text{F}$  NMR (376 MHz,  $\text{CDCl}_3$ ):  $\delta$  -96.15 (s, 1F), -96.19 (s, 1F) ppm. IR (KBr):  $\nu = 3414, 2987, 2230, 1767, 1308, 1075, 849$   $\text{cm}^{-1}$ . HRMS (m/z): calcd for  $\text{C}_{13}\text{H}_{12}\text{F}_2\text{NO}_2$   $[\text{M}+\text{H}]^+$  252.0831, found: 252.0836.

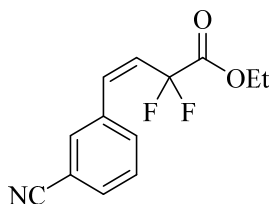

**Ethyl (Z)-4-(3-cyanophenyl)-2,2-difluorobut-3-enoate (3e):** 145.7 mg, 58% yield, colorless oil;  $^1\text{H}$  NMR (400 MHz,  $\text{CDCl}_3$ ):  $\delta$  7.66–7.58 (m, 3H), 7.50–7.44 (m, 1H), 6.91 (dt,  $J = 12.6, 2.3$  Hz, 1H), 5.97 (td,  $J = 13.8, 12.6$  Hz, 1H), 4.19 (q,  $J = 7.1$  Hz, 2H), 1.25 (t,  $J = 7.2$  Hz, 3H) ppm.  $^{13}\text{C}$  NMR (100 MHz,  $\text{CDCl}_3$ ):  $\delta$  163.1 (t,  $J = 33.6$  Hz), 136.2 (t,  $J = 7.5$  Hz), 135.4 (t,  $J = 3.1$  Hz), 133.1 (t,  $J = 3.1$  Hz), 132.2 (t,  $J = 3.1$  Hz), 131.9, 129.0, 123.8 (t,  $J = 27.0$  Hz), 118.3, 112.3, 111.9 (t,  $J = 248.4$  Hz), 63.3, 13.7 ppm.  $^{19}\text{F}$  NMR (376 MHz,  $\text{CDCl}_3$ ):  $\delta$  -96.32 (s, 1F), -96.35 (s, 1F) ppm. IR (KBr):  $\nu = 3413, 2988, 2232, 1766, 1306, 1075, 791$   $\text{cm}^{-1}$ . HRMS (m/z): calcd for  $\text{C}_{13}\text{H}_{12}\text{F}_2\text{NO}_2$   $[\text{M}+\text{H}]^+$  252.0831, found: 252.0836.

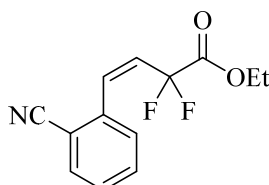

**Ethyl (Z)-4-(2-cyanophenyl)-2,2-difluorobut-3-enoate (3f):** 196.1 mg, 78% yield, colorless oil;  $^1\text{H}$  NMR (400 MHz,  $\text{CDCl}_3$ ):  $\delta$  7.67 (d,  $J = 7.7$  Hz, 1H), 7.62–7.50 (m, 2H), 7.46–7.40 (m, 1H), 7.12 (dt,  $J = 12.5, 2.2$  Hz, 1H), 6.12 (td,  $J = 13.4, 12.5$  Hz, 1H), 4.15 (q,  $J = 7.1$  Hz, 2H), 1.24 (t,  $J = 7.2$  Hz, 3H) ppm.  $^{13}\text{C}$  NMR (100 MHz,  $\text{CDCl}_3$ ):  $\delta$  162.9 (t,  $J = 33.6$  Hz), 137.8 (t,  $J = 1.1$  Hz), 134.5 (t,  $J = 7.7$  Hz), 132.4, 132.4, 129.9 (t,  $J = 4.0$  Hz), 128.8, 125.6 (t,  $J = 26.8$  Hz), 117.2, 111.8 (t,  $J = 1.5$  Hz), 111.7 (t,  $J =$

248.3 Hz), 63.3, 13.7 ppm.  $^{19}\text{F}$  NMR (376 MHz,  $\text{CDCl}_3$ ):  $\delta$  -96.47 (s, 1F), -96.50 ((s, 1F) ppm. IR (KBr):  $\nu$  = 3412, 2927, 2227, 1770, 1304, 1075, 769  $\text{cm}^{-1}$ . HRMS (m/z): calcd for  $\text{C}_{13}\text{H}_{12}\text{F}_2\text{NO}_2$   $[\text{M}+\text{H}]^+$  252.0831, found: 252.0836.

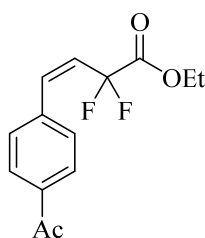

**Ethyl (Z)-4-(4-acetylphenyl)-2,2-difluorobut-3-enoate (3g):** 144.8 mg, 54% yield, colorless oil;  $^1\text{H}$  NMR (400 MHz,  $\text{CDCl}_3$ ):  $\delta$  7.93 (d,  $J$  = 8.5 Hz, 2H), 7.44 (d,  $J$  = 8.0 Hz, 2H), 6.96 (dd,  $J$  = 12.6, 2.1 Hz, 1H), 5.96 (td,  $J$  = 13.6, 12.6 Hz, 1H), 4.11 (q,  $J$  = 7.1 Hz, 2H), 2.60 (s, 3H), 1.18 (t,  $J$  = 7.2 Hz, 3H) ppm.  $^{13}\text{C}$  NMR (100 MHz,  $\text{CDCl}_3$ ): 197.5, 163.2 (t,  $J$  = 33.7 Hz), 138.9 (t,  $J$  = 1.4 Hz), 137.5 (t,  $J$  = 8.3 Hz), 136.6, 129.1 (t,  $J$  = 3.1 Hz), 128.1, 123.4 (t,  $J$  = 27.4 Hz), 112.0 (t,  $J$  = 247.4 Hz), 63.1, 26.6, 13.7 ppm.  $^{19}\text{F}$  NMR (376 MHz,  $\text{CDCl}_3$ ): -95.30 (s, 1F), -95.34 (s, 1F) ppm. IR (KBr):  $\nu$  = 2986, 1767, 1685, 1268, 1154, 1075, 849  $\text{cm}^{-1}$ . HRMS (m/z): calcd for  $\text{C}_{14}\text{H}_{15}\text{F}_2\text{O}_3$   $[\text{M}+\text{H}]^+$  269.0984, found: 269.0989.

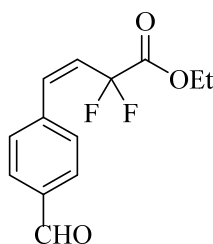

**Ethyl (Z)-2,2-difluoro-4-(4-formylphenyl)but-3-enoate (3h):** 139.4 mg, 55% yield, colorless oil;  $^1\text{H}$  NMR (400 MHz,  $\text{CDCl}_3$ ):  $\delta$  10.02 (s, 1H), 7.86 (d,  $J$  = 8.2 Hz, 2H), 7.52 (d,  $J$  = 8.0 Hz, 2H), 6.99 (dd,  $J$  = 12.7, 2.1 Hz, 1H), 5.99 (q,  $J$  = 13.3 Hz, 1H), 4.13 (q,  $J$  = 7.1 Hz, 2H), 1.20 (t,  $J$  = 7.1 Hz, 3H) ppm.  $^{13}\text{C}$  NMR (100 MHz,  $\text{CDCl}_3$ ):  $\delta$  191.6, 163.2 (t,  $J$  = 33.6 Hz), 140.2, 137.3 (t,  $J$  = 8.0 Hz), 135.9, 129.5 (t,  $J$  = 3.0 Hz), 129.4, 123.8 (t,  $J$  = 27.3 Hz), 111.9 (t,  $J$  = 247.6 Hz), 63.1, 13.7 ppm.  $^{19}\text{F}$  NMR (376 MHz,  $\text{CDCl}_3$ ):  $\delta$  -95.47 (s, 1F), -95.52 (s, 1F) ppm. IR (KBr):  $\nu$  = 3412, 2987, 1768, 1703, 1308, 1074, 843  $\text{cm}^{-1}$ . HRMS (m/z): calcd for  $\text{C}_{13}\text{H}_{13}\text{F}_2\text{O}_3$   $[\text{M}+\text{H}]^+$  255.0827, found: 255.0833.

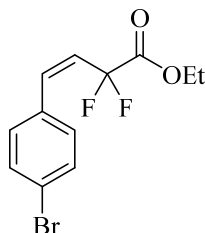

**Ethyl (Z)-4-(4-bromophenyl)-2,2-difluorobut-3-enoate (3i):** 188.5 mg, 62% yield, colorless oil;  $^1\text{H}$  NMR (400 MHz,  $\text{CDCl}_3$ ):  $\delta$  7.47 (d,  $J$  = 8.4 Hz, 2H), 7.23 (d,  $J$  = 8.2 Hz, 2H), 6.86 (d,  $J$  = 12.7 Hz, 1H), 5.89 (q,  $J$  = 13.2 Hz, 1H), 4.12 (q,  $J$  = 7.1 Hz, 2H),

1.19 (t,  $J = 7.2$  Hz, 3H) ppm.  $^{13}\text{C}$  NMR (100 MHz,  $\text{CDCl}_3$ ):  $\delta$  163.3 (t,  $J = 33.8$  Hz), 137.5 (t,  $J = 8.5$  Hz), 133.0 (t,  $J = 1.5$  Hz), 131.3, 130.5 (t,  $J = 3.2$  Hz), 123.0, 122.4 (t,  $J = 27.6$  Hz), 112.1 (t,  $J = 246.9$  Hz), 63.1, 13.7 ppm.  $^{19}\text{F}$  NMR (376 MHz,  $\text{CDCl}_3$ ):  $\delta$  -94.93 (s, 1F), -94.96 (s, 1F) ppm. IR (KBr):  $\nu = 3409, 2984, 1767, 1488, 1305, 1072, 1011$   $\text{cm}^{-1}$ . HRMS ( $m/z$ ): calcd for  $\text{C}_{12}\text{H}_{12}\text{BrF}_2\text{O}_2$   $[\text{M}+\text{H}]^+$  304.9983, found: 304.9989.

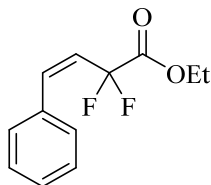

**Ethyl (Z)-2,2-difluoro-4-phenylbut-3-enoate (3j):** 138.6 mg, 61% yield, colorless oil;  $^1\text{H}$  NMR (400 MHz,  $\text{CDCl}_3$ ):  $\delta$  7.37–7.31 (m, 5H), 6.99–6.92 (m, 1H), 5.88 (q,  $J = 12.8$  Hz, 1H), 4.03 (q,  $J = 7.1$  Hz, 2H), 1.13 (t,  $J = 7.1$  Hz, 3H) ppm.  $^{13}\text{C}$  NMR (100 MHz,  $\text{CDCl}_3$ ):  $\delta$  163.4 (t,  $J = 33.8$  Hz), 138.7 (t,  $J = 9.1$  Hz), 134.2 (t,  $J = 1.5$  Hz), 128.9 (t,  $J = 3.0$  Hz), 128.7, 128.2, 121.9 (t,  $J = 28.0$  Hz), 112.2 (t,  $J = 245.8$  Hz), 62.9, 13.6 ppm.  $^{19}\text{F}$  NMR (376 MHz,  $\text{CDCl}_3$ ):  $\delta$  -93.75 (s, 1F), -93.79 (s, 1F) ppm. IR (KBr):  $\nu = 3413, 2964, 1769, 1617, 1262, 1098, 802$   $\text{cm}^{-1}$ . HRMS ( $m/z$ ): calcd for  $\text{C}_{12}\text{H}_{13}\text{F}_2\text{O}_2$   $[\text{M}+\text{H}]^+$  227.0878, found: 227.0884.

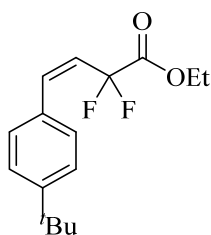

**Ethyl (Z)-4-(4-(tert-butyl)phenyl)-2,2-difluorobut-3-enoate (3k):** 231.5 mg, 82% yield, colorless oil;  $^1\text{H}$  NMR (400 MHz,  $\text{CDCl}_3$ ):  $\delta$  7.41–7.35 (m, 2 H), 7.32–7.28 (m, 2 H), 6.91 (dt,  $J = 12.4, 1.9$  Hz, 1 H), 5.83 (q,  $J = 13.1$  Hz, 1 H), 4.02 (q,  $J = 7.2$  Hz, 2 H), 1.31 (s, 9 H), 1.09 (t,  $J = 7.1$  Hz, 3 H) ppm.  $^{13}\text{C}$  NMR (100 MHz,  $\text{CDCl}_3$ ):  $\delta$  163.5 (t,  $J = 33.8$  Hz), 152.0, 138.6 (t,  $J = 9.0$  Hz), 128.8 (t,  $J = 2.8$  Hz), 127.2, 125.8, 125.1, 121.1 (t,  $J = 28.1$  Hz), 115.4–109.6 (m), 62.9, 34.6, 31.1, 13.5 ppm.  $^{19}\text{F}$  NMR (376 MHz,  $\text{CDCl}_3$ ):  $\delta$  -93.57, -93.60 ppm. IR (KBr):  $\nu = 2964, 1770, 1365, 1304, 1074, 1018, 843$   $\text{cm}^{-1}$ . HRMS ( $m/z$ ): calcd for  $\text{C}_{16}\text{H}_{21}\text{F}_2\text{O}_2$   $[\text{M}+\text{H}]^+$  283.1504, found: 283.1510.

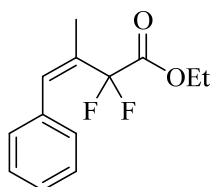

**Ethyl (Z)-2,2-difluoro-3-methyl-4-phenylbut-3-enoate (3l):** 175.3 mg, 73% yield, colorless oil;  $^1\text{H}$  NMR (400 MHz,  $\text{CDCl}_3$ ):  $\delta$  7.39–7.27 (m, 3H), 7.22–7.21 (m, 2H), 6.83–6.80 (m, 1H), 3.87 (q,  $J = 7.1$  Hz, 2H), 2.06 (d,  $J = 1.7$  Hz, 3H), 1.11 (t,  $J = 7.2$  Hz, 3H) ppm.  $^{13}\text{C}$  NMR (100 MHz,  $\text{CDCl}_3$ ): 162.8 (t,  $J = 33.6$  Hz), 142.7, 135.4 (t,  $J = 23.9$  Hz), 128.7, 128.3 (t,  $J = 1.9$  Hz), 127.8, 110.6 (t,  $J = 253.8$  Hz), 109.0 (t,  $J = 7.4$  Hz), 62.9, 25.3 (t,  $J = 4.0$  Hz), 13.6 ppm.  $^{19}\text{F}$  NMR (376 MHz,  $\text{CDCl}_3$ ):  $\delta$  -96.99 (s,

2F), ppm. **IR (KBr):**  $\nu = 2985, 1771, 1371, 1243, 1125, 1051, 698 \text{ cm}^{-1}$ . **HRMS (m/z):** calcd for  $\text{C}_{13}\text{H}_{15}\text{F}_2\text{O}_2$   $[\text{M}+\text{H}]^+$  241.1035, found: 241.1040.

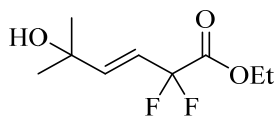

**Ethyl (E)-2,2-difluoro-5-hydroxy-5-methylhex-3-enoate (3m):** 89.5 mg, 43% yield, colorless oil;  **$^1\text{H}$  NMR (400 MHz,  $\text{CDCl}_3$ ):**  $\delta$  6.37 (dt,  $J = 15.8, 2.4$  Hz, 1H), 5.92 (dt,  $J = 15.9, 11.4$  Hz, 1H), 4.32 (q,  $J = 7.1$  Hz, 2H), 1.69 (brs, 1H), 1.37–1.33 (m, 9H) ppm.  **$^{13}\text{C}$  NMR (100 MHz,  $\text{CDCl}_3$ ):**  $\delta$  163.9 (t,  $J = 34.7$  Hz), 146.1 (t,  $J = 8.3$  Hz), 118.0 (t,  $J = 25.1$  Hz), 112.5 (t,  $J = 247.3$ ), 70.6, 63.0, 29.4 (t,  $J = 1.6$  Hz), 13.9 ppm.  **$^{19}\text{F}$  NMR (376 MHz,  $\text{CDCl}_3$ ):**  $\delta$  -103.33 (s, 1F), -103.36 (s, 1F) ppm. **IR (KBr):**  $\nu = 2980, 1767, 1374, 1274, 1227, 1081, 971 \text{ cm}^{-1}$ . **HRMS (m/z):** calcd for  $\text{C}_9\text{H}_{15}\text{F}_2\text{O}_3$   $[\text{M}+\text{H}]^+$  209.0984, found: 209.0989.

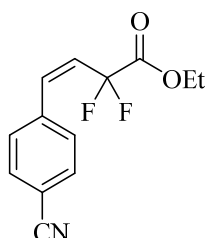

**Ethyl (Z)-4-(4-cyanophenyl)-2,2-difluorobut-3-enoate (4a):** 178.4 mg, 71% yield, colorless oil;  **$^1\text{H}$  NMR (400 MHz,  $\text{CDCl}_3$ ):**  $\delta$  7.64 (d,  $J = 8.1$  Hz, 2H), 7.46 (d,  $J = 8.1$  Hz, 2H), 6.94 (dt,  $J = 12.8, 2.2$  Hz, 1H), 5.99 (td,  $J = 13.7, 12.7$  Hz, 1H), 4.18 (q,  $J = 7.2$  Hz, 2H), 1.23 (t,  $J = 7.1$  Hz, 3H) ppm.  **$^{13}\text{C}$  NMR (100 MHz,  $\text{CDCl}_3$ ):**  $\delta$  163.1 (t,  $J = 33.6$  Hz), 138.7 (t,  $J = 1.4$  Hz), 136.7 (t,  $J = 7.8$  Hz), 131.8, 129.4 (t,  $J = 3.2$  Hz), 124.1 (t,  $J = 27.1$  Hz), 118.4, 112.1, 111.8 (t,  $J = 248.2$  Hz), 63.2, 13.7 ppm.  **$^{19}\text{F}$  NMR (376 MHz,  $\text{CDCl}_3$ ):**  $\delta$  -96.15 (s, 1F), -96.19 (s, 1F) ppm. **IR (KBr):**  $\nu = 3414, 2987, 2230, 1767, 1308, 1075, 849 \text{ cm}^{-1}$ . **HRMS (m/z):** calcd for  $\text{C}_{13}\text{H}_{12}\text{F}_2\text{NO}_2$   $[\text{M}+\text{H}]^+$  252.0831, found: 252.0836.

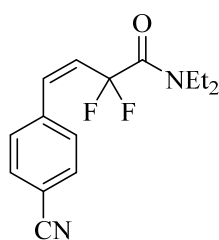

**(Z)-4-(4-Cyanophenyl)-N,N-diethyl-2,2-difluorobut-3-enamide (4b):** 108.5 mg, 39% yield, colorless oil;  **$^1\text{H}$  NMR (400 MHz,  $\text{CDCl}_3$ ):**  $\delta$  7.61 (d,  $J = 8.4$  Hz, 2H), 7.46 (d,  $J = 8.1$  Hz, 2H), 6.88 (dt,  $J = 12.6, 2.5$  Hz, 1H), 6.14 (td,  $J = 14.0, 12.8$  Hz, 1H), 3.39 (q,  $J = 7.1$  Hz, 2H), 3.30 (q,  $J = 7.1$  Hz, 2H), 1.14 (t,  $J = 7.1$  Hz, 3H), 1.01 (t,  $J = 7.1$  Hz, 3H) ppm.  **$^{13}\text{C}$  NMR (100 MHz,  $\text{CDCl}_3$ ):**  $\delta$  161.7 (t,  $J = 29.8$  Hz), 139.1 (t,  $J = 1.3$  Hz), 135.0 (t,  $J = 7.8$  Hz), 131.7, 129.6 (t,  $J = 3.2$  Hz), 125.4 (t,  $J = 26.4$  Hz), 118.5, 114.4 (t,  $J = 250.4$  Hz), 111.8, 41.9 (t,  $J = 4.8$  Hz), 41.3, 13.9, 12.0 ppm.  **$^{19}\text{F}$  NMR (376 MHz,  $\text{CDCl}_3$ ):**  $\delta$  -90.57 (s, 1F), -90.62 (s, 1F) ppm. **IR (KBr):**  $\nu = 2973, 2230, 1665, 1464, 1136, 1091, 863 \text{ cm}^{-1}$ . **HRMS (m/z):** calcd for  $\text{C}_{15}\text{H}_{17}\text{F}_2\text{N}_2\text{O}$   $[\text{M}+\text{H}]^+$  279.1303, found: 279.1309.

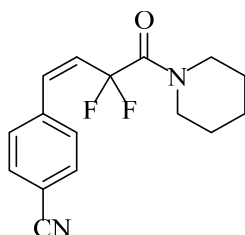

**(Z)-4-(3,3-Difluoro-4-oxo-4-(piperidin-1-yl)but-1-en-1-yl)benzonitrile (4c):** 159.6 mg, 55% yield, colorless oil;  $^1\text{H NMR}$  (400 MHz,  $\text{CDCl}_3$ ):  $\delta$  7.65 (d,  $J = 8.4$  Hz, 2H), 7.55 (d,  $J = 8.3$  Hz, 2H), 6.99 (dt,  $J = 16.3, 2.5$  Hz, 1H), 6.60 (dt,  $J = 16.3, 11.1$  Hz, 1H), 3.65–3.59 (m, 4H), 1.69–1.62 (m, 6H) ppm.  $^{13}\text{C NMR}$  (100 MHz,  $\text{CDCl}_3$ ):  $\delta$  160.7 (t,  $J = 29.3$  Hz), 139.0 (t,  $J = 1.1$  Hz), 135.0 (t,  $J = 7.9$  Hz), 131.7, 129.6 (t,  $J = 3.1$  Hz), 125.4 (t,  $J = 26.5$  Hz), 118.6, 114.3 (t,  $J = 249.7$  Hz), 111.9, 46.9 (t,  $J = 4.8$  Hz), 44.3, 26.1, 25.4, 24.2 ppm.  $^{19}\text{F NMR}$  (376 MHz,  $\text{CDCl}_3$ ):  $\delta$  -90.09 (s, 1F), -90.13 (s, 1F) ppm. **IR (KBr):**  $\nu = 3032, 2937, 2231, 1664, 1460, 1044, 869$   $\text{cm}^{-1}$ . **HRMS (m/z):** calcd for  $\text{C}_{16}\text{H}_{17}\text{F}_2\text{N}_2\text{O}$   $[\text{M}+\text{H}]^+$  291.1303, found: 291.1309.

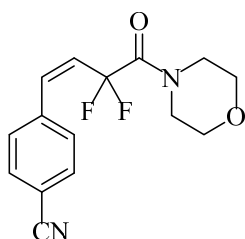

**(Z)-4-(3,3-Difluoro-4-morpholino-4-oxobut-1-en-1-yl)benzonitrile (4d):** 236.6 mg, 81% yield, colorless oil;  $^1\text{H NMR}$  (400 MHz,  $\text{CDCl}_3$ ):  $\delta$  7.62 (d,  $J = 8.1$  Hz, 2H), 7.44 (d,  $J = 8.1$  Hz, 2H), 6.93 (dt,  $J = 12.6, 2.5$  Hz, 1H), 6.14 (q,  $J = 13.6$  Hz, 1H), 3.65–3.59 (m, 4H), 3.55–3.48 (m, 4H) ppm.  $^{13}\text{C NMR}$  (100 MHz,  $\text{CDCl}_3$ ):  $\delta$  161.0 (t,  $J = 30.1$  Hz), 138.9 (t,  $J = 1.3$  Hz), 135.6 (t,  $J = 7.7$  Hz), 131.8, 129.5 (t,  $J = 3.2$  Hz), 124.7 (t,  $J = 25.9$  Hz), 118.5, 114.2 (t,  $J = 250.1$  Hz), 112.1, 66.5, 66.4, 46.5 (t,  $J = 4.9$  Hz), 43.3 ppm.  $^{19}\text{F NMR}$  (376 MHz,  $\text{CDCl}_3$ ):  $\delta$  -90.09 (s, 1F), -90.13 (s, 1F) ppm. **IR (KBr):**  $\nu = 3412, 2863, 2230, 1664, 1448, 1109, 855$   $\text{cm}^{-1}$ . **HRMS (m/z):** calcd for  $\text{C}_{15}\text{H}_{15}\text{F}_2\text{N}_2\text{O}_2$   $[\text{M}+\text{H}]^+$  293.1096, found: 293.1102.

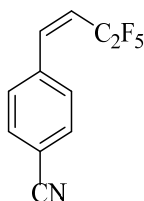

**(Z)-4-(3,3,4,4,4-Pentafluorobut-1-en-1-yl)benzonitrile (4e):** 168.0 mg, 68% yield, colorless oil;  $^1\text{H NMR}$  (400 MHz,  $\text{CDCl}_3$ ):  $\delta$  7.66 (d,  $J = 8.4$  Hz, 2H), 7.44 (d,  $J = 8.1$  Hz, 2H), 7.15 (dt,  $J = 12.8, 2.9$  Hz, 1H), 5.87 (td,  $J = 14.9, 12.6$  Hz, 1H) ppm.  $^{13}\text{C NMR}$  (100 MHz,  $\text{CDCl}_3$ ):  $\delta$  140.1 (t,  $J = 5.0$  Hz), 138.5, 131.9, 129.1 (t,  $J = 3.6$  Hz), 118.4 (t,  $J = 22.1$  Hz), 118.4, 112.4 ppm; carbons corresponding to the  $\text{C}_2\text{F}_5$  group cannot be identified due to C-F coupling.  $^{19}\text{F NMR}$  (376 MHz,  $\text{CDCl}_3$ ):  $\delta$  -85.25 (s, 3F), -108.4–-111.30 (m, 2F) ppm. **IR (KBr):**  $\nu = 3413, 2232, 1339, 1204, 1109, 880, 582$   $\text{cm}^{-1}$ . **HRMS (m/z):** calcd for  $\text{C}_{11}\text{H}_7\text{F}_5\text{N}$   $[\text{M}+\text{H}]^+$  248.0493, found: 248.0499.

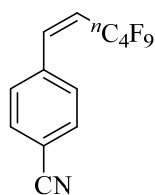

**(Z)-4-(3,3,4,4,5,5,6,6,6-Nonafluorohex-1-en-1-yl)benzotrile (4f):** 215.1 mg, 62% yield, yellow oil;  $^1\text{H NMR}$  (400 MHz,  $\text{CDCl}_3$ ):  $\delta$  7.66 (d,  $J = 8.3$  Hz, 2H), 7.43 (d,  $J = 7.6$  Hz, 2H), 7.16 (dt,  $J = 12.8, 3.2$  Hz, 1H), 5.91 (q,  $J = 14.6$  Hz, 1H) ppm.  $^{13}\text{C NMR}$  (100 MHz,  $\text{CDCl}_3$ ):  $\delta$  140.0 (t,  $J = 6.4$  Hz), 138.6, 131.9, 129.0 (t,  $J = 4.0$  Hz), 118.6 (t,  $J = 22.4$  Hz), 118.4, 112.4 ppm; carbons corresponding to the  $\text{C}_4\text{F}_9$  group cannot be identified due to C-F coupling.  $^{19}\text{F NMR}$  (376 MHz,  $\text{CDCl}_3$ ):  $\delta$  -80.91 (d,  $J = 10.6$  Hz, 3F), -105.65–106.02 (m, 2F), -123.97 (q,  $J = 11.0$  Hz, 2F), -125.54–125.92 (m, 2F) ppm. **IR (KBr):**  $\nu = 3414, 2232, 1617, 1355, 1237, 1134, 872$   $\text{cm}^{-1}$ . **HRMS (m/z):** calcd for  $\text{C}_{13}\text{H}_7\text{F}_9\text{N}$   $[\text{M}+\text{H}]^+$  348.0429, found: 348.0435.

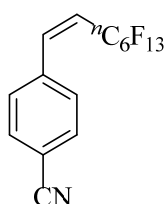

**(Z)-4-(3,3,4,4,5,5,6,6,7,7,8,8,8-Tridecafluorooct-1-en-1-yl)benzotrile (4g):** 317.4 mg, 71% yield, white solid;  $^1\text{H NMR}$  (400 MHz,  $\text{CDCl}_3$ ):  $\delta$  7.66 (d,  $J = 8.4$  Hz, 2H), 7.43 (d,  $J = 8.0$  Hz, 2H), 7.16 (dt,  $J = 12.8, 3.1$  Hz, 1H), 5.91 (q,  $J = 14.8$  Hz, 1H) ppm.  $^{13}\text{C NMR}$  (100 MHz,  $\text{CDCl}_3$ ):  $\delta$  139.9 (t,  $J = 5.4$  Hz), 138.7, 131.9, 129.0 (t,  $J = 3.5$  Hz), 118.7 (t,  $J = 22.6$  Hz), 118.4, 112.4 ppm. carbons corresponding to the  $\text{C}_6\text{F}_{13}$  group cannot be identified due to C-F coupling.  $^{19}\text{F NMR}$  (376 MHz,  $\text{CDCl}_3$ ):  $\delta$  -80.72 (t,  $J = 9.8$  Hz, 3F), -105.64 (q,  $J = 14.3$  Hz, 2F), -121.50–121.64 (m, 2F), -122.76–122.68 (m, 2F), -123.03–123.61 (m, 2F), -126.06–126.17 (m, 2F) ppm. **IR (KBr):**  $\nu = 3063, 2234, 1648, 1368, 1245, 1123, 705$   $\text{cm}^{-1}$ . **HRMS (m/z):** calcd for  $\text{C}_{15}\text{H}_7\text{F}_{13}\text{N}$   $[\text{M}+\text{H}]^+$  448.0365, found: 448.0371.

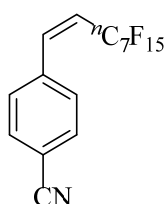

**(Z)-4-(3,3,4,4,5,5,6,6,7,7,8,8,9,9,9-Pentadecafluoronon-1-en-1-yl)benzotrile (4h):** 308.2 mg, 62% yield, white solid;  $^1\text{H NMR}$  (400 MHz,  $\text{CDCl}_3$ ):  $\delta$  7.66 (d,  $J = 8.4$  Hz, 2H), 7.43 (d,  $J = 8.0$  Hz, 2H), 7.16 (dt,  $J = 12.7, 3.0$  Hz, 1H), 5.91 (td,  $J = 15.5, 13.4$  Hz, 1H) ppm.  $^{13}\text{C NMR}$  (100 MHz,  $\text{CDCl}_3$ ): 139.9 (t,  $J = 4.7$  Hz), 138.7, 131.9, 129.0 (t,  $J = 3.6$  Hz), 118.7 (t,  $J = 22.4$  Hz), 118.4, 112.4 ppm; carbons corresponding to the  $\text{C}_7\text{F}_{15}$  group cannot be identified due to C-F coupling.  $^{19}\text{F NMR}$  (376 MHz,  $\text{CDCl}_3$ ):  $\delta$  -80.67 (t,  $J = 9.8$  Hz, 3F), -105.62 (q,  $J = 14.3$  Hz, 2F), -121.31–121.47 (m, 2F), -121.97–122.04 (m, 2F), -122.61–122.77 (m, 2F), -122.98–123.08 (m, 2F), -126.04–126.14 (m, 2F) ppm. **IR (KBr):**  $\nu = 3043, 2235, 1649, 1244, 1147, 1093, 701$   $\text{cm}^{-1}$ . **HRMS (m/z):** calcd for  $\text{C}_{16}\text{H}_7\text{F}_{15}\text{N}$   $[\text{M}+\text{H}]^+$  498.0333, found: 498.0339.

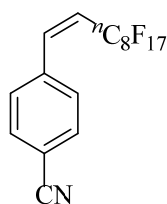

**(Z)-4-(3,3,4,4,5,5,6,6,7,7,8,8,9,9,10,10,10-Heptafluorodec-1-en-1-yl)benzonitrile (4i):** 300.9 mg, 55% yield, white solid;  $^1\text{H NMR}$  (400 MHz,  $\text{CDCl}_3$ ):  $\delta$  7.65 (d,  $J = 8.4$  Hz, 2H), 7.43 (d,  $J = 8.0$  Hz, 2H), 7.16 (dt,  $J = 12.8, 3.1$  Hz, 1H), 5.90 (td,  $J = 15.3, 12.8$  Hz, 1H) ppm.  $^{13}\text{C NMR}$  (100 MHz,  $\text{CDCl}_3$ ):  $\delta$  139.9 (t,  $J = 6.4$  Hz), 138.7, 131.9, 129.0 (t,  $J = 3.9$  Hz), 118.7 (t,  $J = 22.5$  Hz), 118.4, 112.5 ppm; carbons corresponding to the  $\text{C}_8\text{F}_{17}$  group cannot be identified due to C-F coupling.  $^{19}\text{F NMR}$  (376 MHz,  $\text{CDCl}_3$ ):  $\delta$  -80.80 (t,  $J = 10.2$  Hz, 3F), -105.66 (q,  $J = 14.4$  Hz, 2F), -121.31–-121.47 (m, 2F), -121.81–-122.01 (m, 4F), -122.65–-122.81 (m, 2F), -123.02–-123.11 (m, 2F), -126.09–-126.18 (m, 2F) ppm. **IR (KBr):**  $\nu = 3063, 2235, 1510, 1220, 1093, 966, 655$   $\text{cm}^{-1}$ . **HRMS (m/z):** calcd for  $\text{C}_{17}\text{H}_7\text{F}_{17}\text{N}$   $[\text{M}+\text{H}]^+$  548.0302, found: 548.0307.

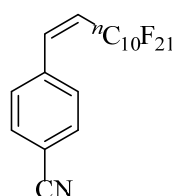

**(Z)-4-(3,3,4,4,5,5,6,6,7,7,8,8,9,9,10,10,11,11,12,12,12-Henicosaf luorododec-1-en-1-yl)benzonitrile (4j):** 323.5 mg, 50% yield, white solid;  $^1\text{H NMR}$  (400 MHz,  $\text{CDCl}_3$ ):  $\delta$  7.66 (d,  $J = 7.9$  Hz, 2H), 7.43 (d,  $J = 8.0$  Hz, 2H), 7.16 (dt,  $J = 12.8, 3.2$  Hz, 1H), 5.91 (q,  $J = 14.8$  Hz, 1H) ppm.  $^{13}\text{C NMR}$  (100 MHz,  $\text{CDCl}_3$ ):  $\delta$  139.9 (t,  $J = 6.5$  Hz), 138.6, 131.9, 129.0 (t,  $J = 3.9$  Hz), 118.7 (t,  $J = 22.8$  Hz), 118.4, 112.4 ppm; carbons corresponding to the  $\text{C}_{10}\text{F}_{21}$  group cannot be identified due to C-F coupling.  $^{19}\text{F NMR}$  (376 MHz,  $\text{CDCl}_3$ ):  $\delta$  -80.66 (t,  $J = 10.0$  Hz, 3F), -105.58 (q,  $J = 13.9$  Hz, 2F), -121.29 (s, 2F), -121.52–-121.95 (m, 8F), -122.61 (s, 2F), -122.97 (s, 2F), -125.97–-126.06 (m, 2F) ppm. **IR (KBr):**  $\nu = 2235, 1220, 1150, 1093, 1073, 879, 662$   $\text{cm}^{-1}$ . **HRMS (m/z):** calcd for  $\text{C}_{19}\text{H}_7\text{F}_{21}\text{N}$   $[\text{M}+\text{H}]^+$  648.0238, found: 648.0234.

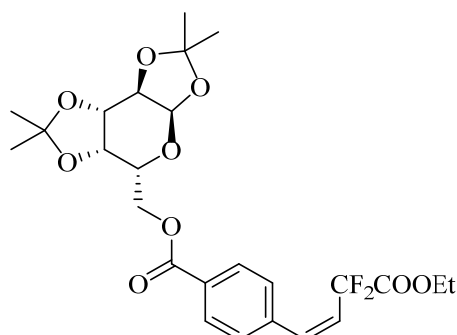

**((3aR,5R,5aS,8aS,8bR)-2,2,7,7-Tetramethyltetrahydro-5H-bis([1,3]dioxolo)[4,5-b:4',5'-d]pyran-5-yl)methyl 4-((Z)-4-ethoxy-3,3-difluoro-4-oxobut-1-en-1-yl)benzoate (6a):** 276.6 mg, 54% yield, white solid;  $^1\text{H NMR}$  (400 MHz,  $\text{CDCl}_3$ ):  $\delta$  8.02 (d,  $J = 8.4$  Hz, 2H), 7.41 (d,  $J = 8.3$  Hz, 2H), 6.96 (dt,  $J = 12.8, 2.1$  Hz, 1H), 5.95 (td,  $J = 13.4, 12.4$  Hz, 1H), 5.56 (d,  $J = 5.0$  Hz, 1H), 4.65 (dd,  $J = 7.9, 2.5$  Hz, 1H), 4.52 (dd,  $J = 11.5, 4.9$  Hz, 1H), 4.43 (dd,  $J = 11.5, 7.5$  Hz, 1H), 4.35 (dd,  $J = 4.9, 2.5$  Hz,



1H), 4.33 (dd,  $J = 7.9, 1.9$  Hz, 1H), 4.17 (ddd,  $J = 7.1, 4.8, 1.9$  Hz, 1H), 4.09 (q,  $J = 7.1$  Hz, 2H), 1.52 (s, 3H), 1.48 (s, 3H), 1.36 (s, 3H), 1.33 (s, 3H), 1.18 (t,  $J = 7.1$  Hz, 3H) ppm.  $^{13}\text{C}$  NMR (100 MHz,  $\text{CDCl}_3$ ):  $\delta$  165.9, 163.2 (t,  $J = 33.7$  Hz), 138.8 (t,  $J = 1.4$  Hz), 137.6 (t,  $J = 8.4$  Hz), 129.9, 129.5, 128.8 (t,  $J = 3.1$  Hz), 123.4 (t,  $J = 27.6$  Hz), 112.0 (t,  $J = 274.1$  Hz), 109.7, 108.8, 96.3, 71.1, 70.7, 70.5, 66.1, 64.0, 63.1, 26.0, 26.0, 25.0, 24.5, 13.7 ppm.  $^{19}\text{F}$  NMR (376 MHz,  $\text{CDCl}_3$ ):  $\delta$  -95.08 (s, 1F), -95.13 (s, 1F) ppm. IR (KBr):  $\nu = 2980, 1770, 1723, 1279, 1212, 1071, 887$   $\text{cm}^{-1}$ . HRMS (m/z): calcd for  $\text{C}_{25}\text{H}_{31}\text{F}_2\text{O}_9$   $[\text{M}+\text{H}]^+$  513.1931, found: 513.1936.

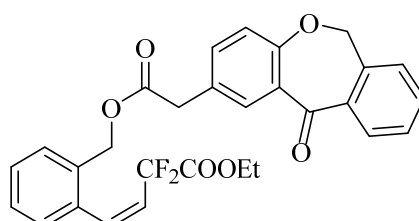

**Ethyl (Z)-2,2-difluoro-4-(2-((2-(11-oxo-6,11-dihydrodibenzo[*b,e*]oxepin-2-yl)acetoxymethyl)phenyl)but-3-enoate (6b):** 334.1 mg, 66% yield, colorless oil;  $^1\text{H}$  NMR (400 MHz,  $\text{CDCl}_3$ ):  $\delta$  8.05 (d,  $J = 2.3$  Hz, 1H), 7.81 (d,  $J = 7.6$  Hz, 1H), 7.49 (td,  $J = 7.5, 1.4$  Hz, 1H), 7.40 (td,  $J = 7.6, 1.3$  Hz, 1H), 7.35–7.28 (m, 2H), 7.28–7.21 (m, 3H), 7.17 (d,  $J = 5.3$  Hz, 1H), 6.99 (dd,  $J = 12.5, 2.1$  Hz, 1H), 6.95 (d,  $J = 8.4$  Hz, 1H), 5.90 (q,  $J = 12.1$  Hz, 1H), 5.11 (s, 2H), 5.03 (s, 2H), 3.87 (q,  $J = 7.1$  Hz, 2H), 3.61 (s, 2H), 1.06 (t,  $J = 7.2$  Hz, 3H) ppm.  $^{13}\text{C}$  NMR (100 MHz,  $\text{CDCl}_3$ ):  $\delta$  190.7, 171.0, 163.2 (t,  $J = 33.3$  Hz), 160.5, 140.4, 136.5 (t,  $J = 8.9$  Hz), 136.3, 135.5, 134.0, 133.2, 132.8, 132.5, 129.4, 129.2, 128.8, 128.7, 128.2, 127.8, 127.5, 125.1, 124.1 (t,  $J = 27.4$  Hz), 121.1, 112.0 (t,  $J = 246.6$  Hz), 73.6, 64.6, 62.9, 40.0, 13.6 ppm.  $^{19}\text{F}$  NMR (376 MHz,  $\text{CDCl}_3$ ):  $\delta$  -94.55 (s, 1F), -94.60 (s, 1F) ppm. IR (KBr):  $\nu = 2925, 1768, 1738, 1491, 1301, 1154, 761$   $\text{cm}^{-1}$ . HRMS (m/z): calcd for  $\text{C}_{29}\text{H}_{25}\text{F}_2\text{O}_6$   $[\text{M}+\text{H}]^+$  507.1614, found: 507.1619.

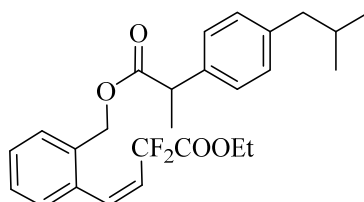

**Ethyl (Z)-2,2-difluoro-4-(2-(((2-(4-isobutylphenyl)propanoyl)oxy)methyl)phenyl)but-3-enoate (6c):** 239.7 mg, 54% yield, colorless oil;  $^1\text{H}$  NMR (400 MHz,  $\text{CDCl}_3$ ):  $\delta$  7.20–7.08 (m, 6H), 7.03–6.99 (m, 2H), 6.75 (dt,  $J = 12.1, 1.6$  Hz, 1H), 5.76 (q,  $J = 12.0$  Hz, 1H), 4.96 (d,  $J = 2.1$  Hz, 2H), 3.82 (q,  $J = 7.2$  Hz, 2H), 3.66 (q,  $J = 7.2$  Hz, 1H), 2.38 (d,  $J = 7.2$  Hz, 2H), 1.82–1.72 (m, 1H), 1.42 (d,  $J = 7.1$  Hz, 3H), 1.04 (t,  $J = 7.2$  Hz, 3H), 0.83 (d,  $J = 6.6$  Hz, 6H) ppm.  $^{13}\text{C}$  NMR (100 MHz,  $\text{CDCl}_3$ ):  $\delta$  174.3, 163.2 (t,  $J = 33.5$  Hz), 140.7, 137.5, 136.5 (t,  $J = 9.2$  Hz), 133.9 (t,  $J = 1.1$  Hz), 133.4 (t,  $J = 1.2$  Hz), 129.3, 128.6, 128.4, 128.0, 127.2, 123.8 (t,  $J = 27.5$  Hz), 112.0 (t,  $J = 246.3$  Hz), 64.5, 62.9, 45.0, 45.0, 30.2, 22.4, 22.3, 18.2, 13.6 ppm.  $^{19}\text{F}$  NMR (376 MHz,  $\text{CDCl}_3$ ):  $\delta$  -94.53 (d,  $J = 4.9$  Hz, 1F), -94.56 (d,  $J = 4.9$  Hz, 1F) ppm. IR (KBr):  $\nu = 2957, 1771, 1738, 1455, 1318, 1156, 1073$   $\text{cm}^{-1}$ . HRMS (m/z): calcd for  $\text{C}_{26}\text{H}_{31}\text{F}_2\text{O}_4$   $[\text{M}+\text{H}]^+$  445.2185, found: 445.2190.

## References

1. S. E. Sloane, A. Reyes, Z. P. Vang, L. Li, K. T. Behlow, J. R. Clark, *Org. Lett.* **2020**, *22*, 9139–9144.
2. X. Wang, Y. Gao, H. Zhao, X.-Q. Liu, Z. Wang, A. Qin, Q. Hu, J. Z. Sun, B. Z. Tang, *Polym. Chem.* **2014**, *5*, 6216-6224.
3. Y. Kozhemyakin, A. Kretzschmar, M. Krämer, F. Rominger, A. Dreuw, U. H. F. Bunz, *Chem. Eur. J.* **2017**, *23*, 9908 –9918.
4. Z.-L. Shen, K. K. K. Goh, C. H. A. Wong, W.-Y. Loo, Y.-S. Yang, J. Lu, T.-P. Loh, *Chem. Commun.* **2012**, *48*, 5856-5858.
5. W. Fu, Q. Song, *Org. Lett.* **2018**, *20*, 393–396.
6. Y. Li, J. Liu, S. Zhao, X. Du, M. Guo, W. Zhao, X. Tang, G. Wang, *Org. Lett.* **2018**, *20*, 917-920.





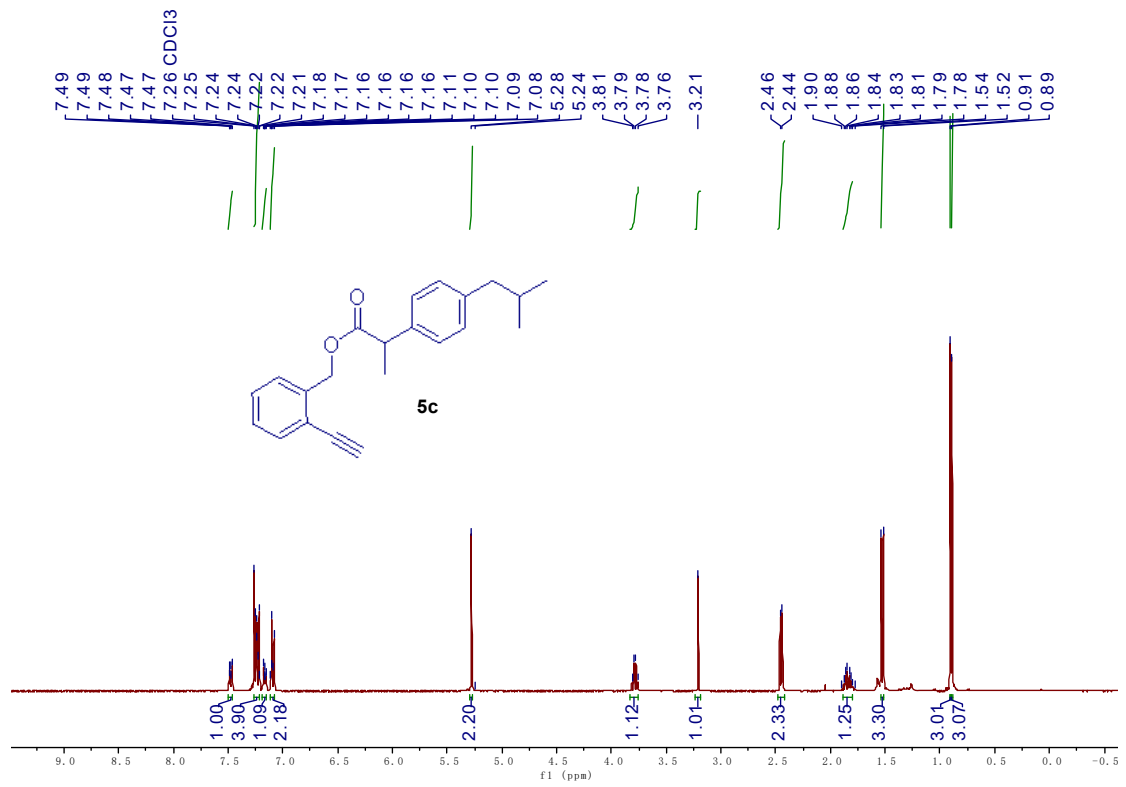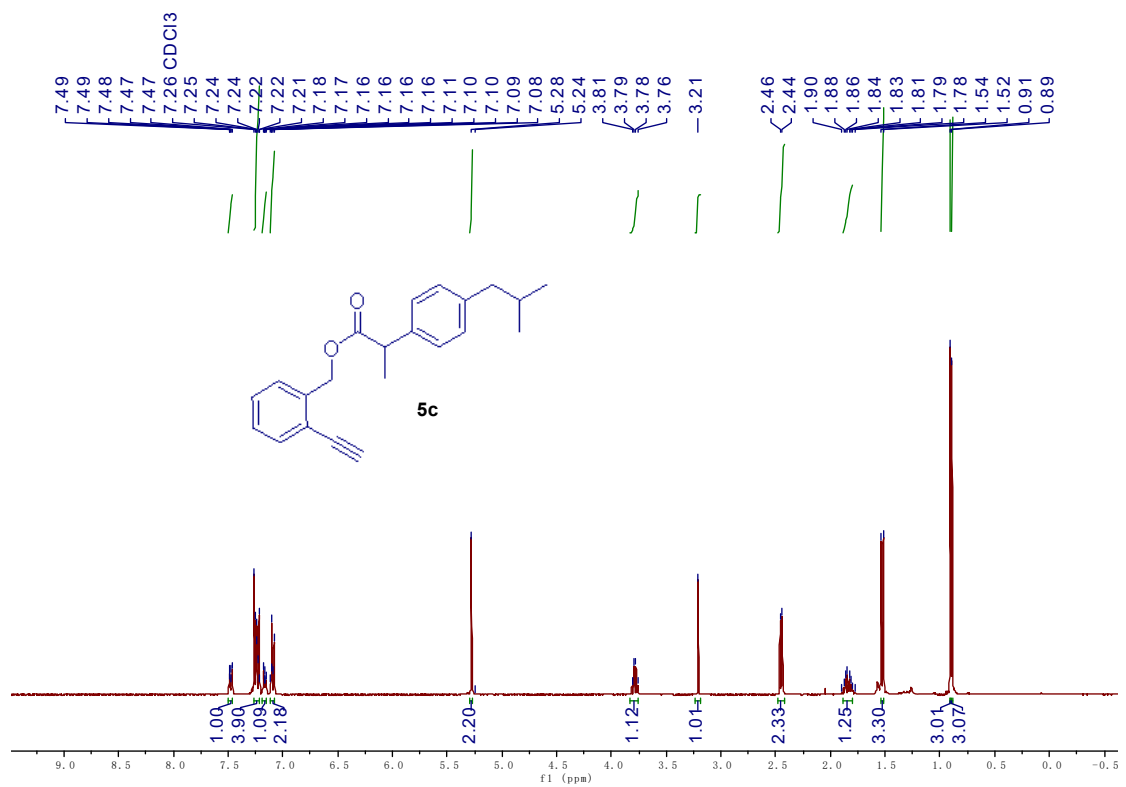

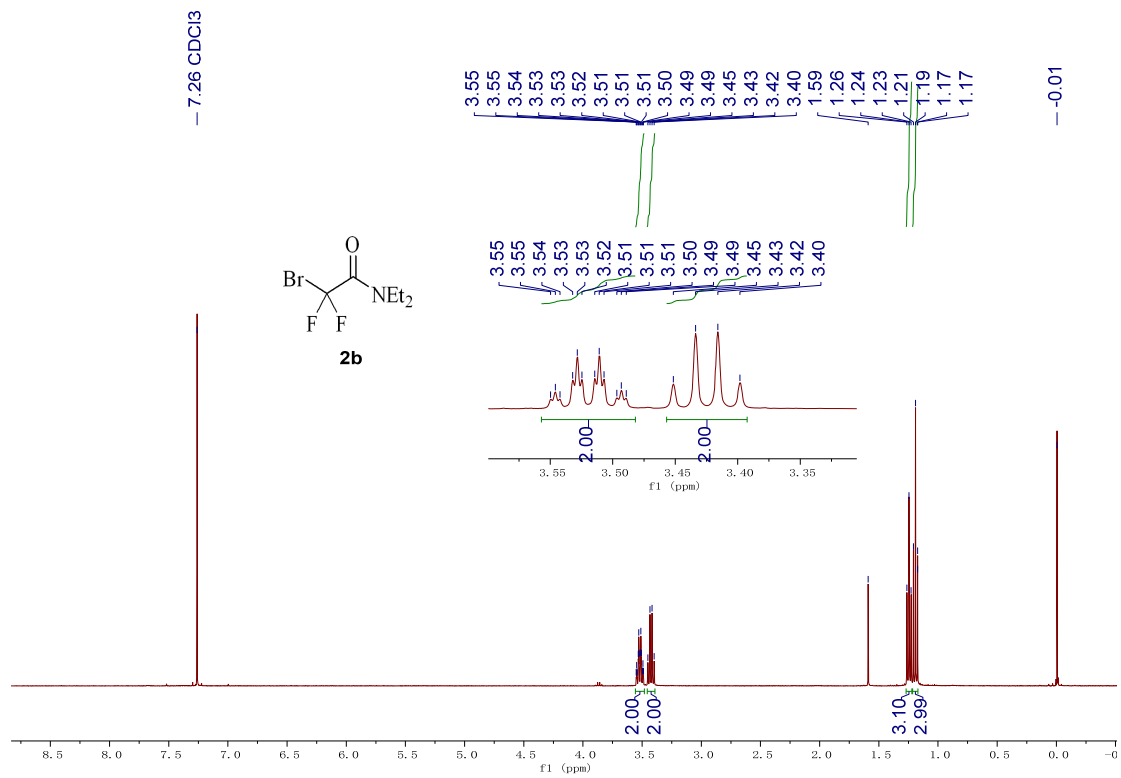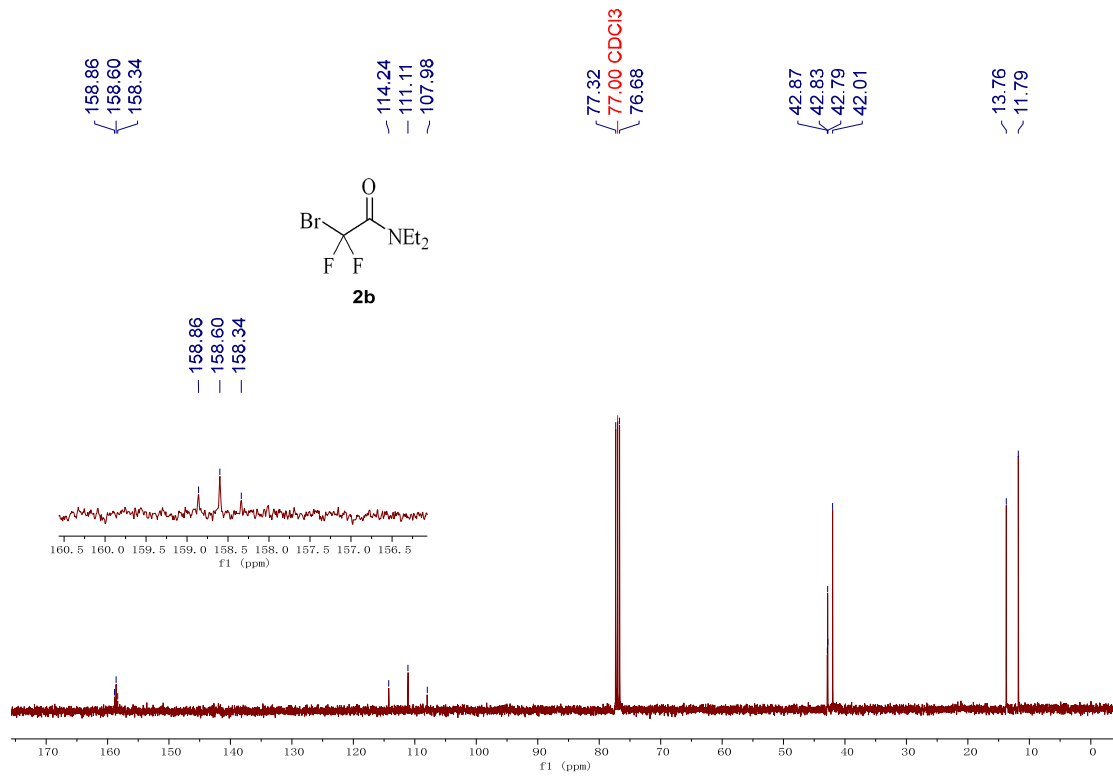

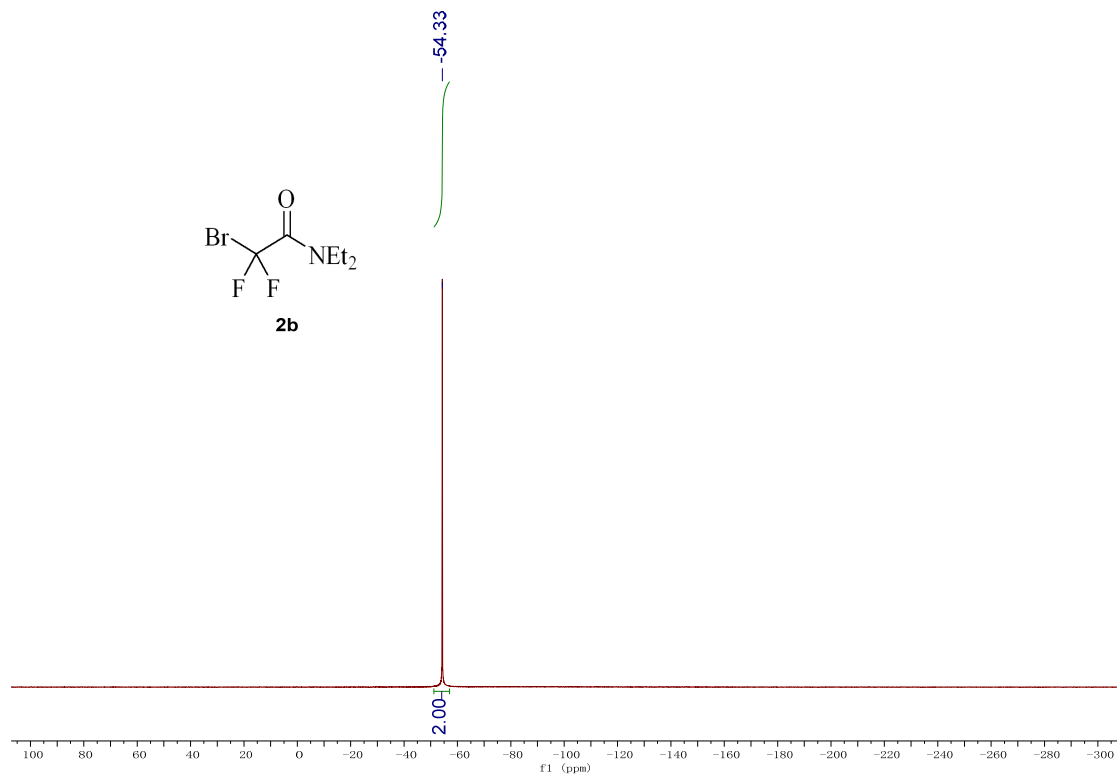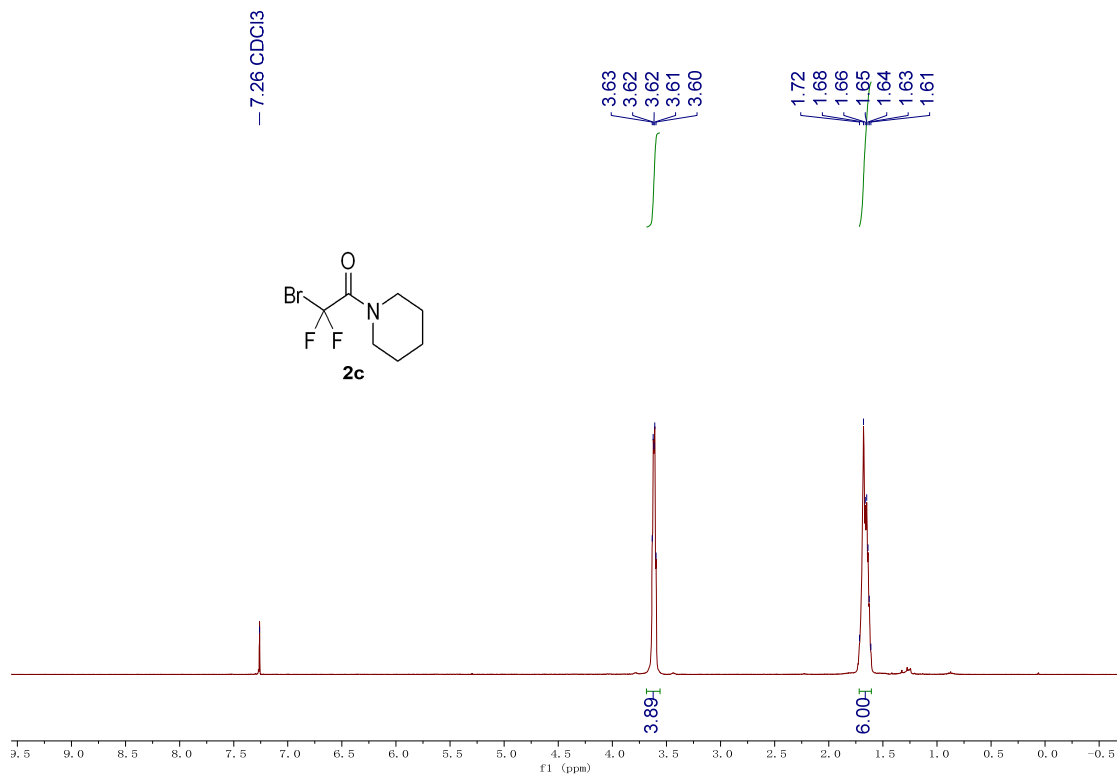

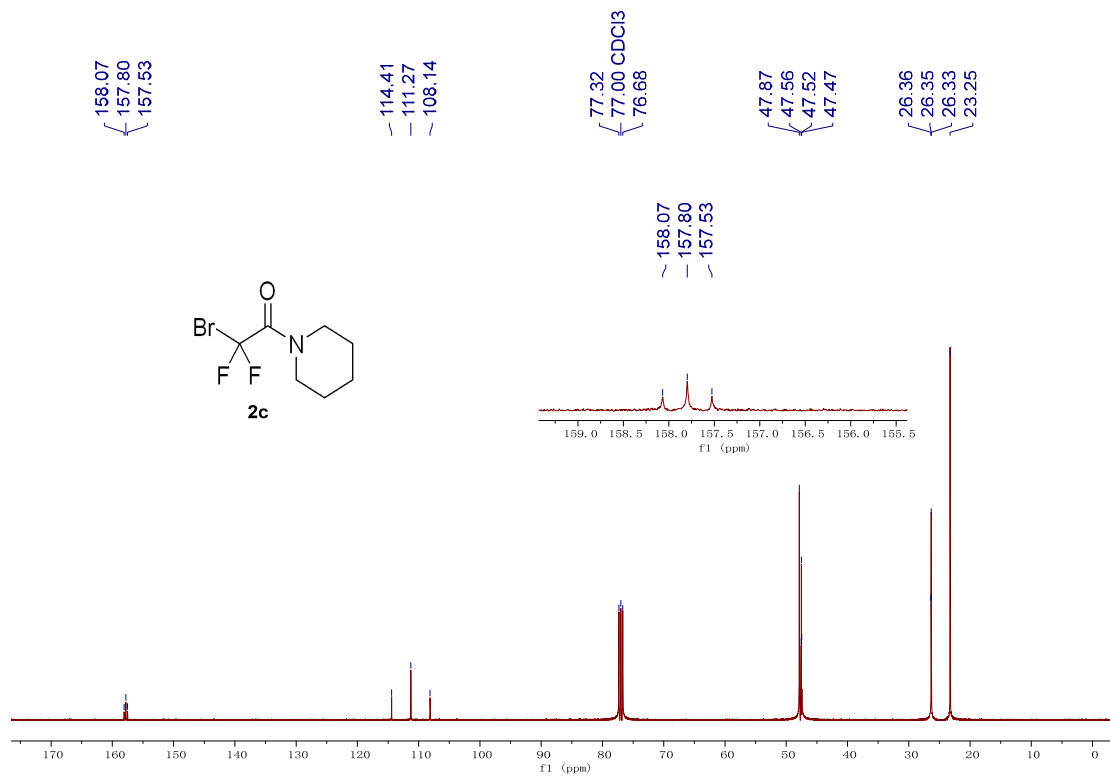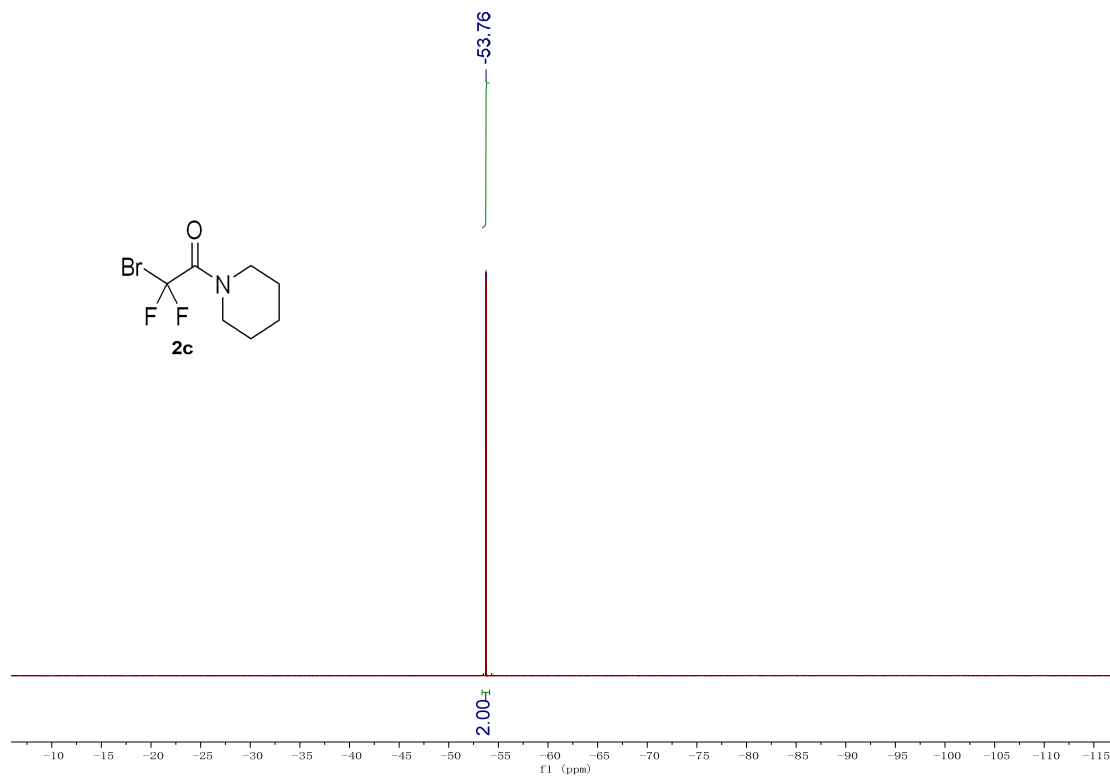



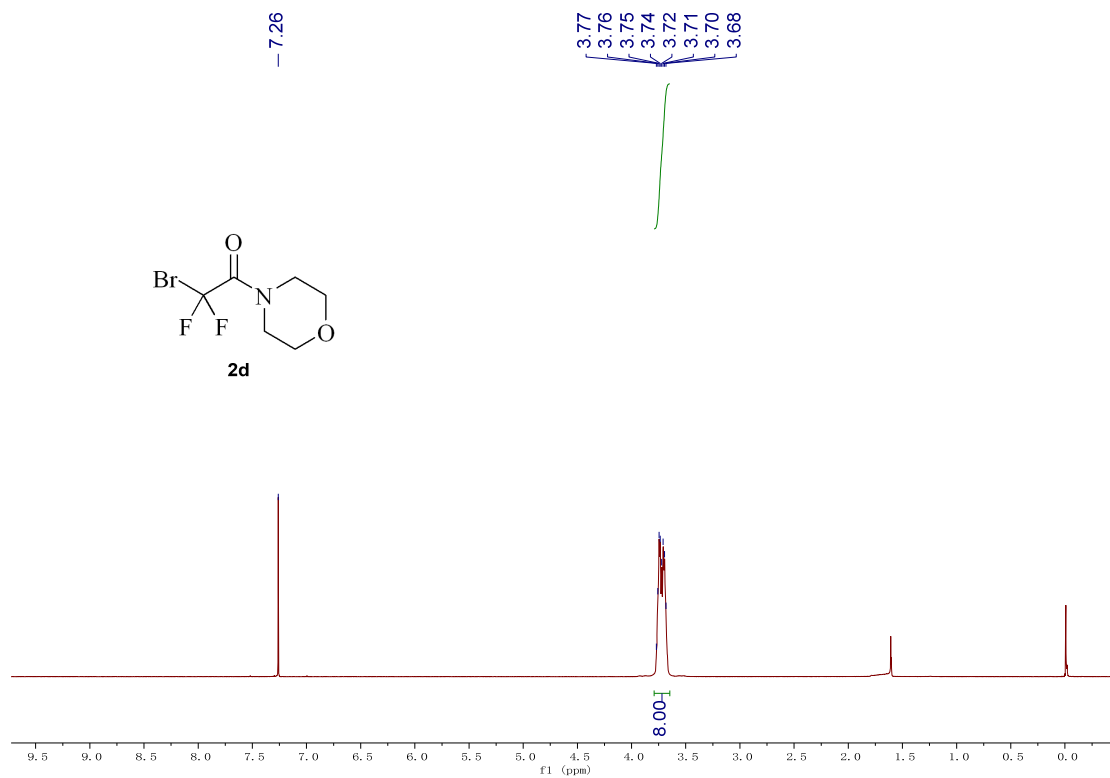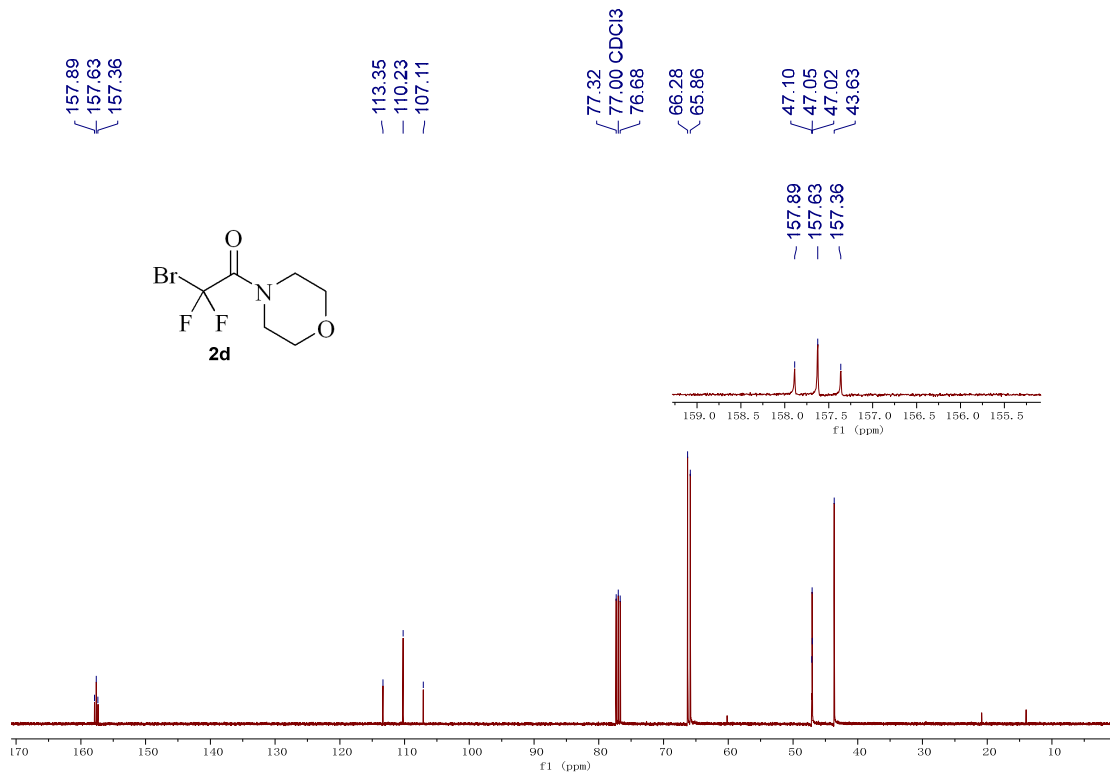

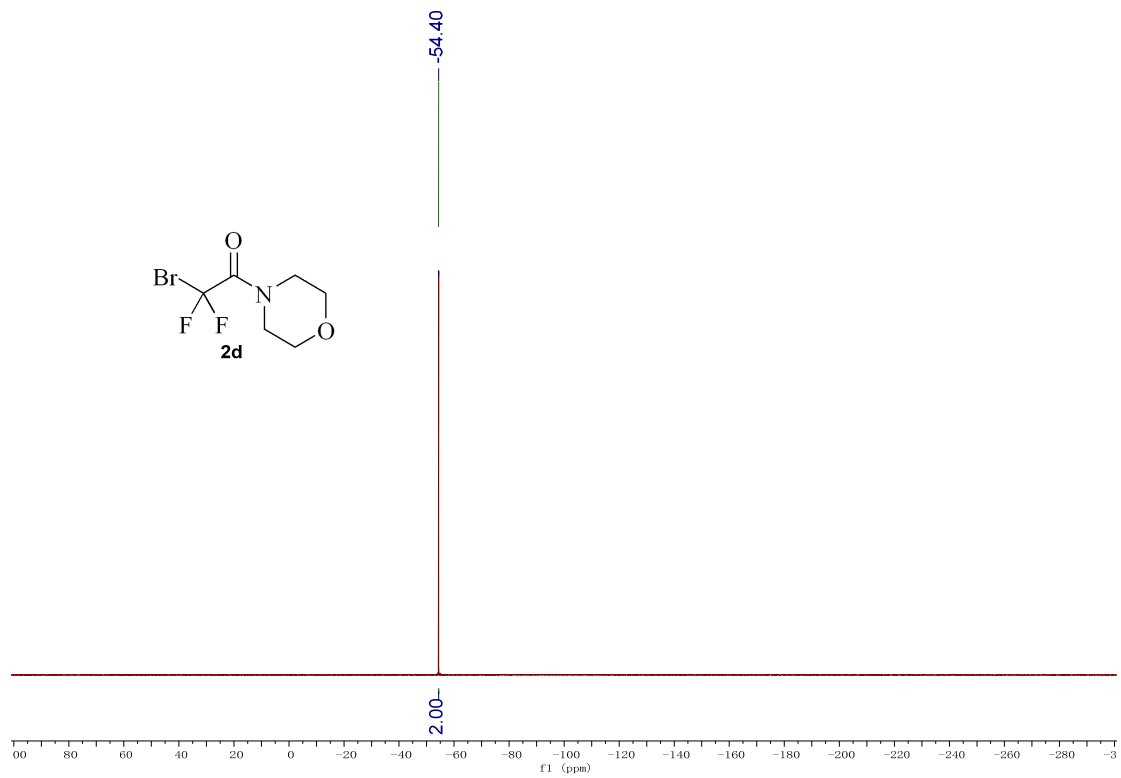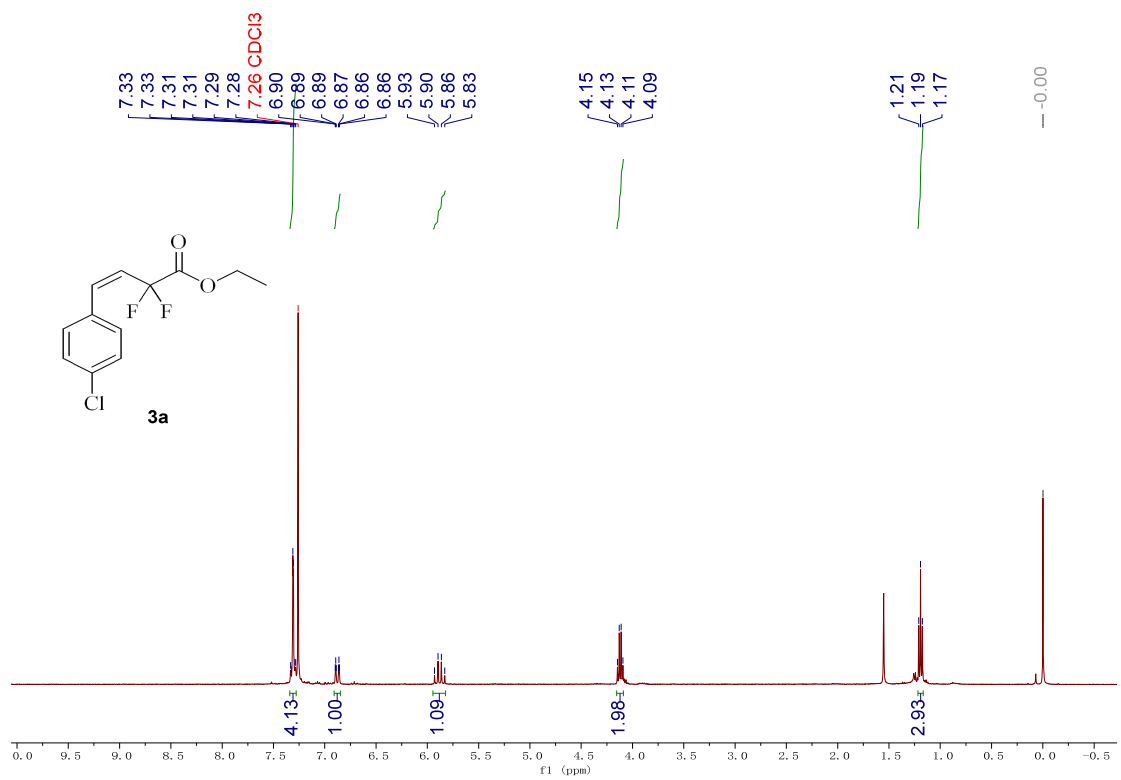

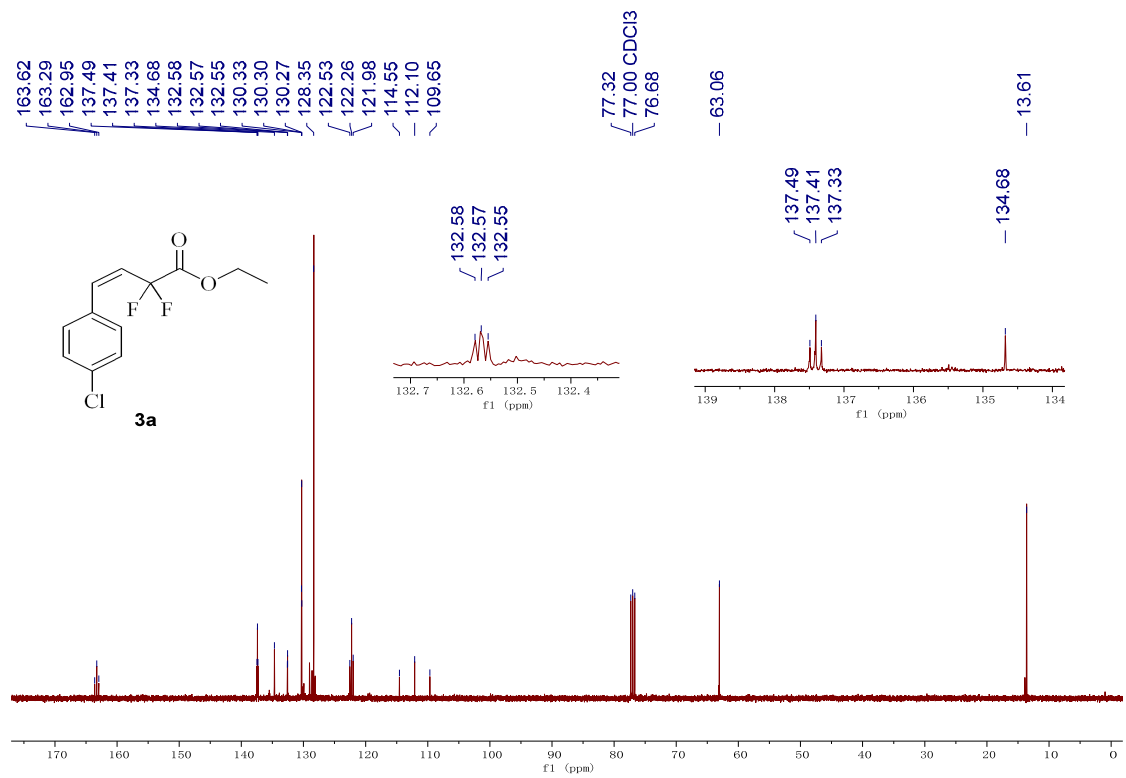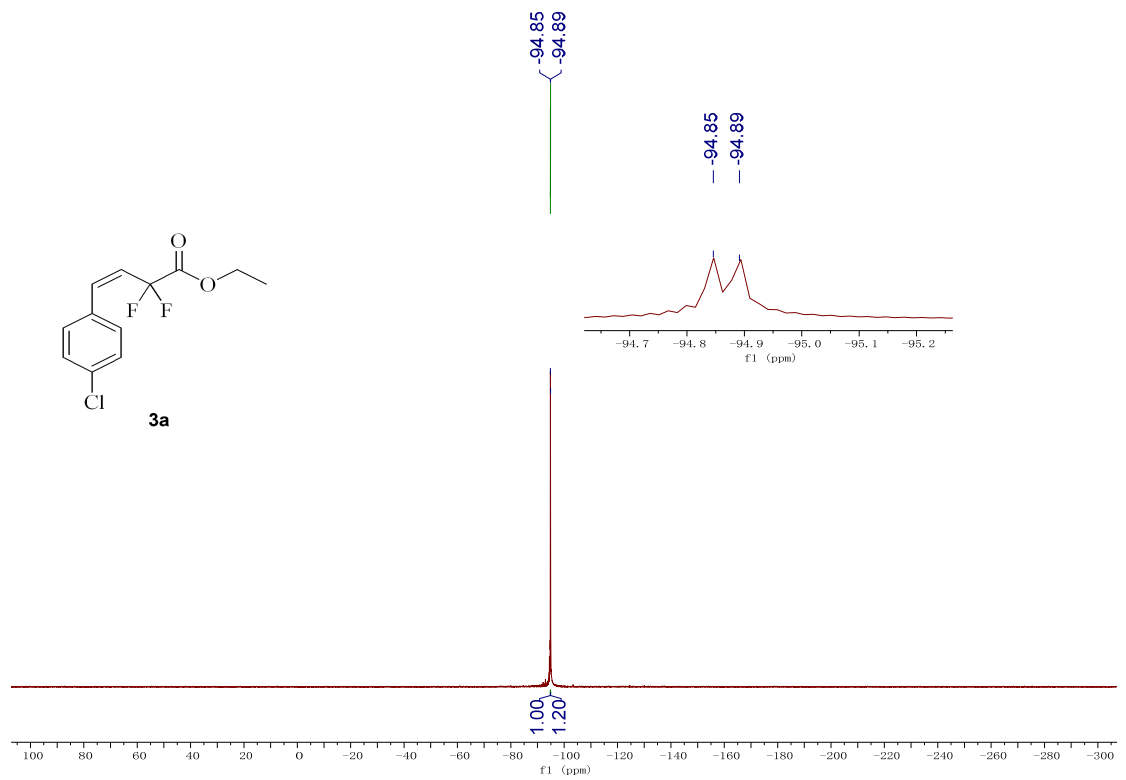

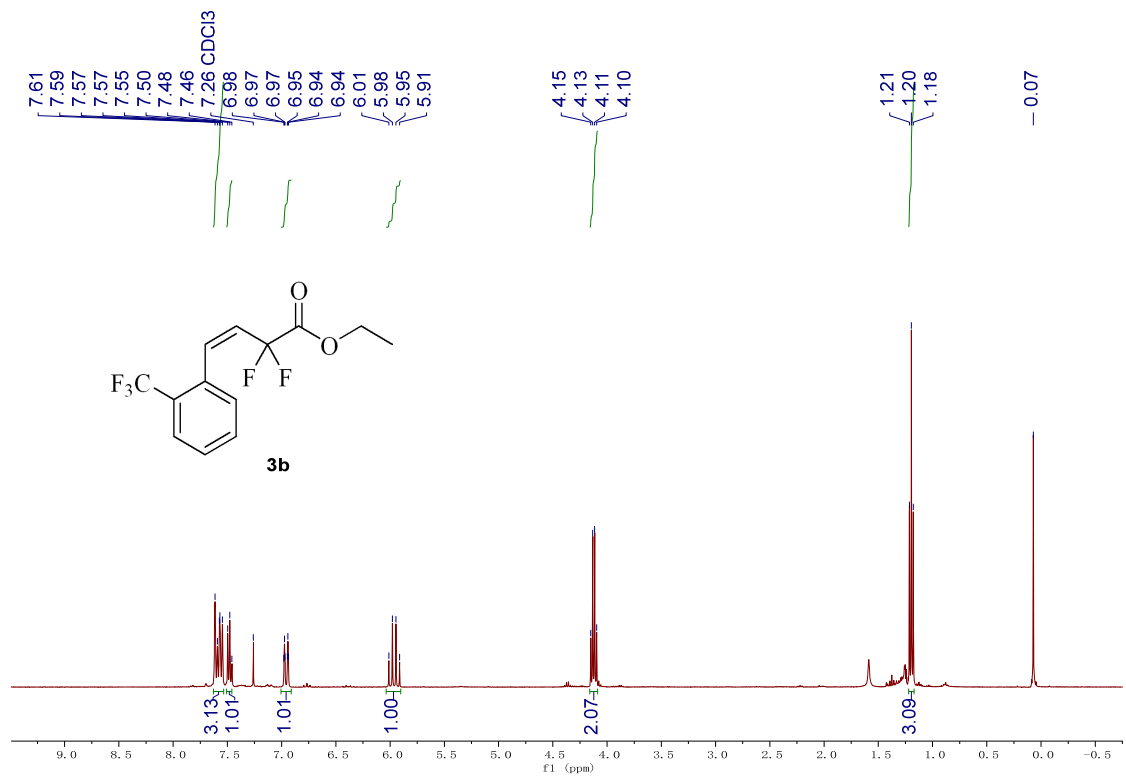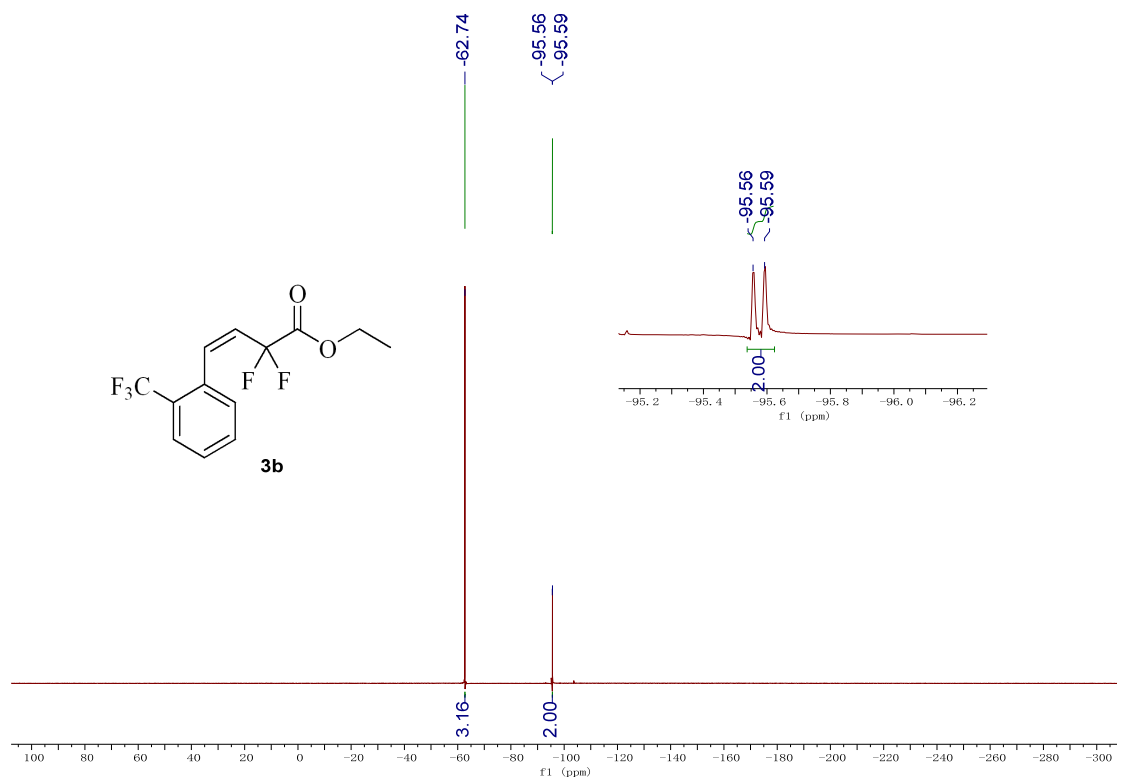

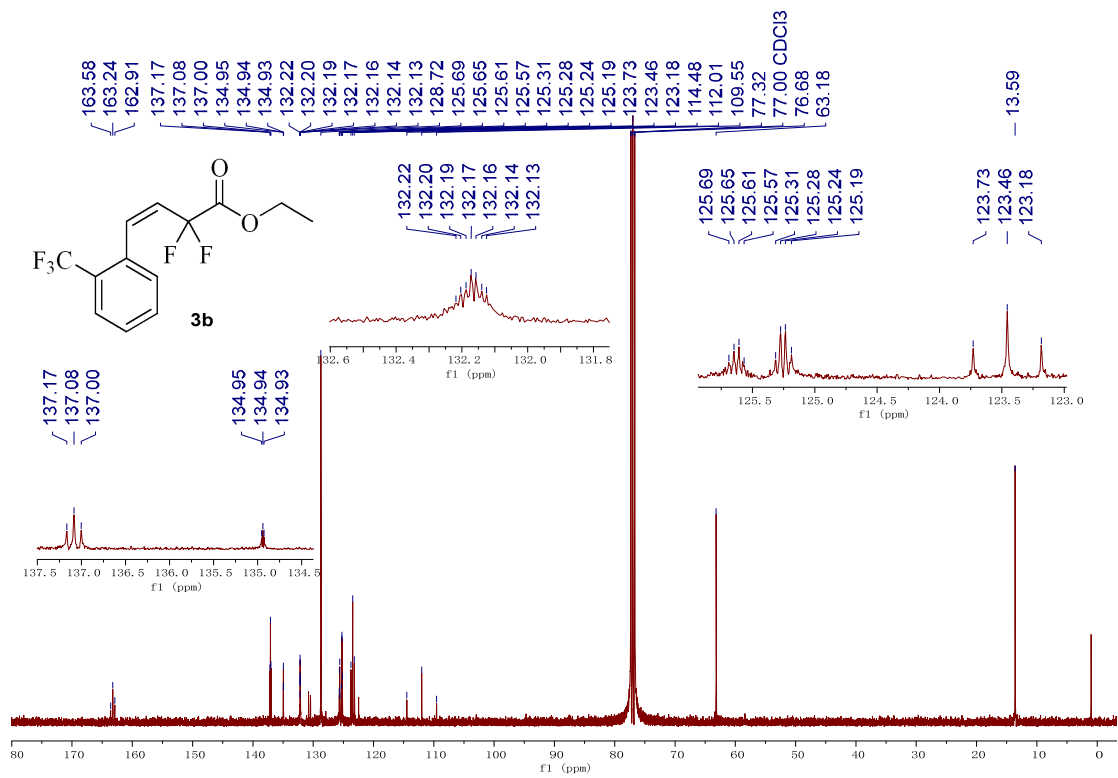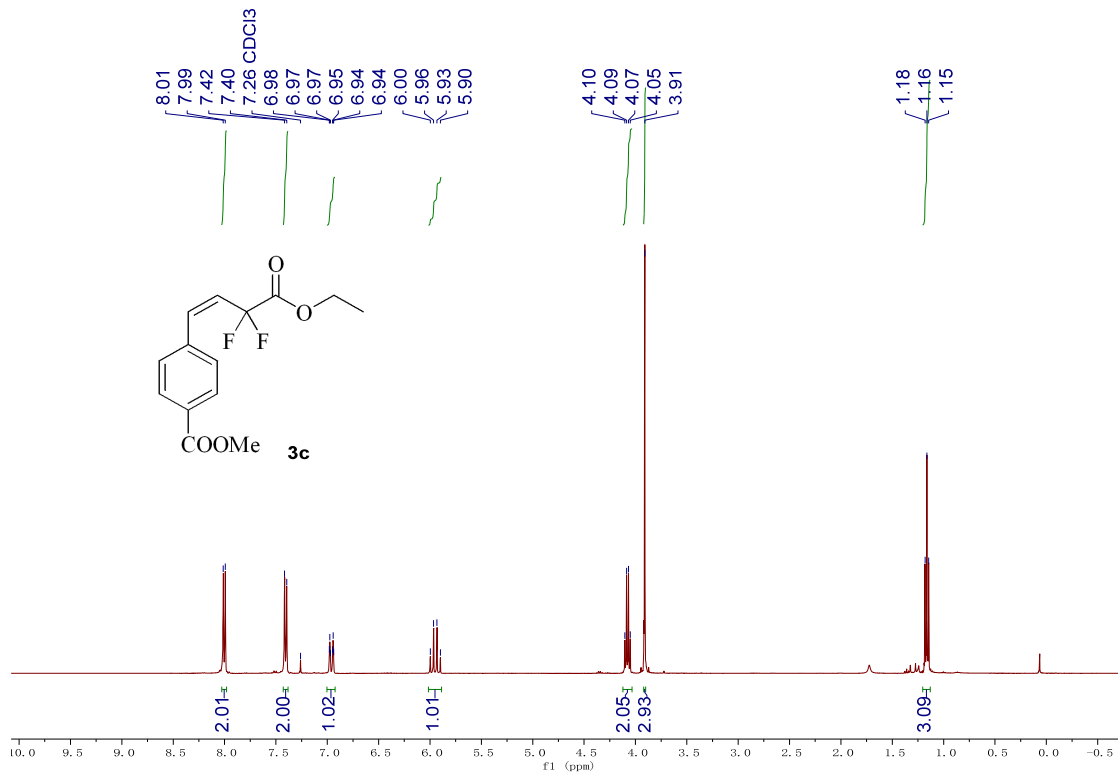

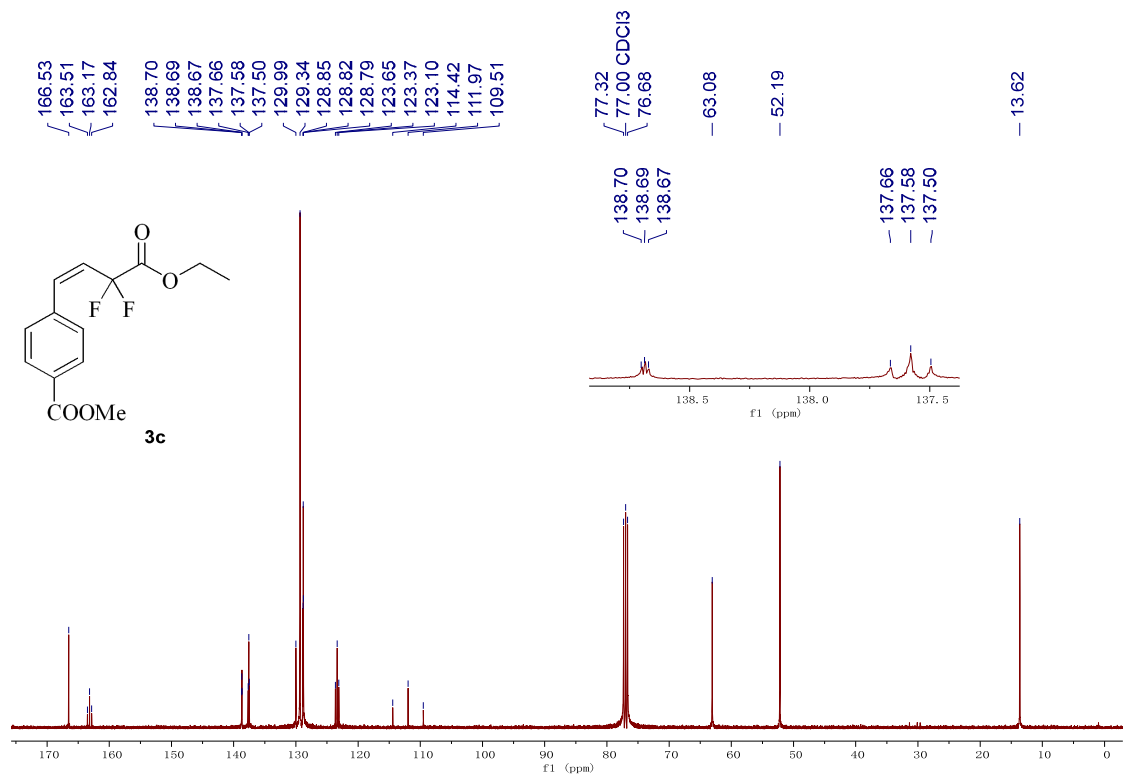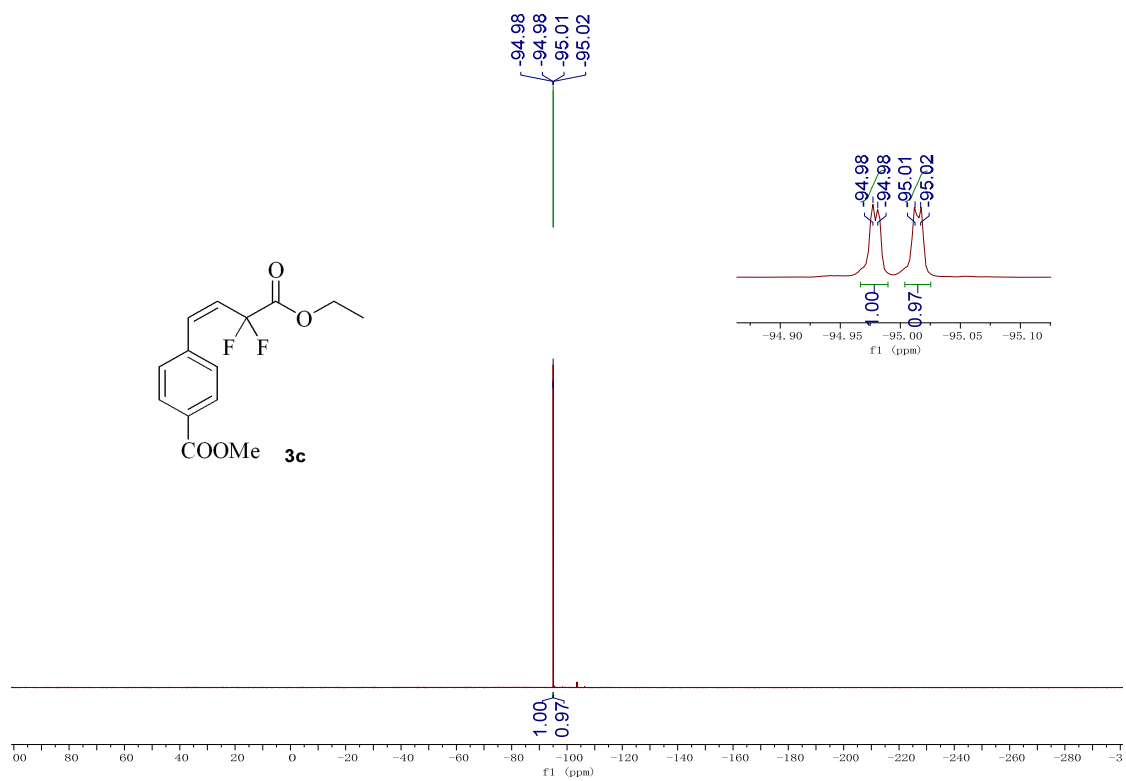

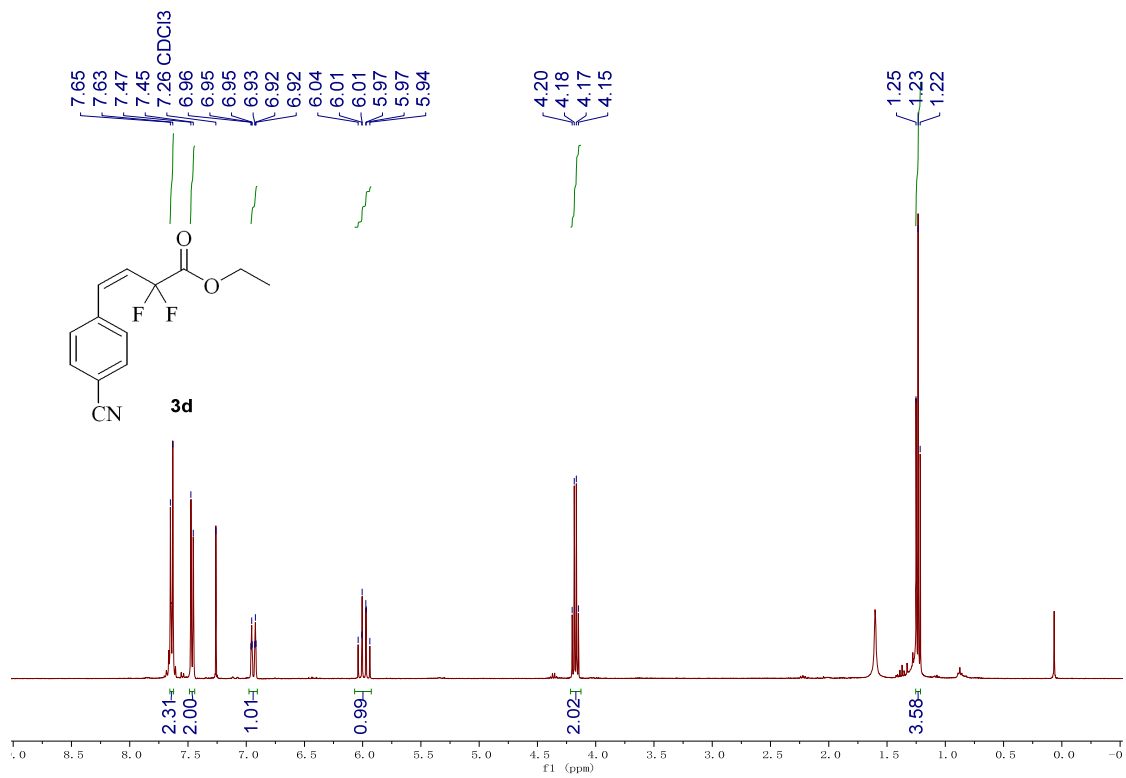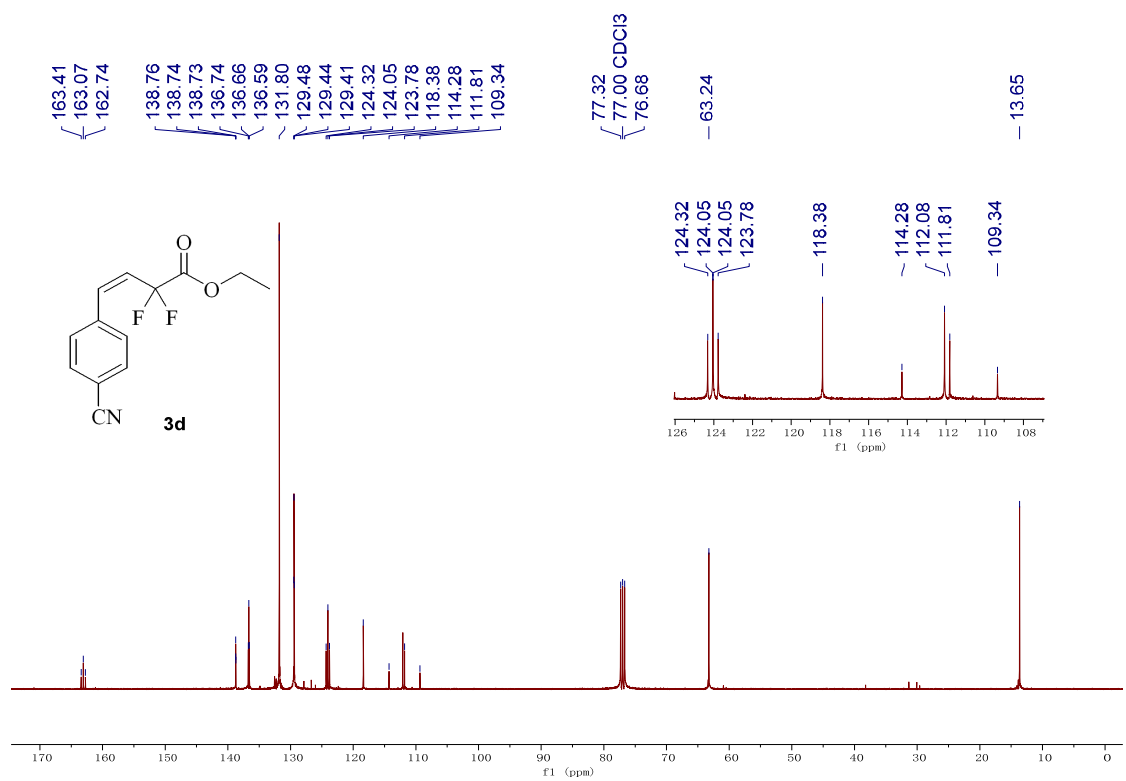

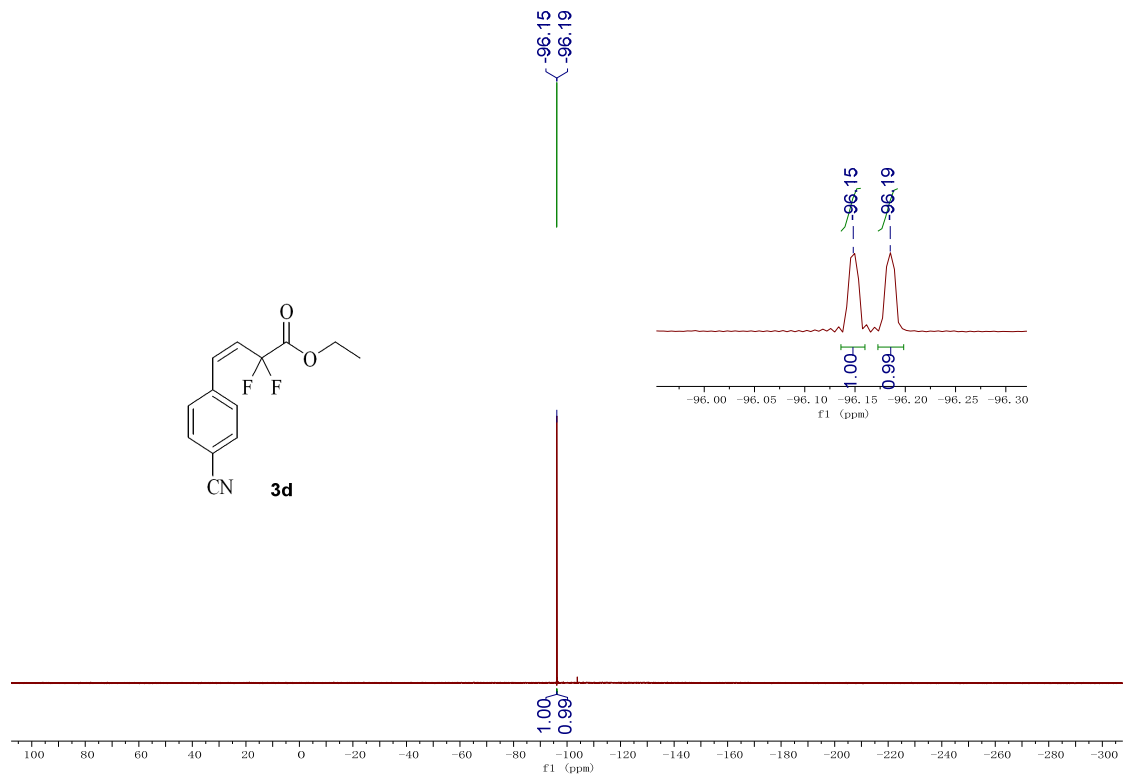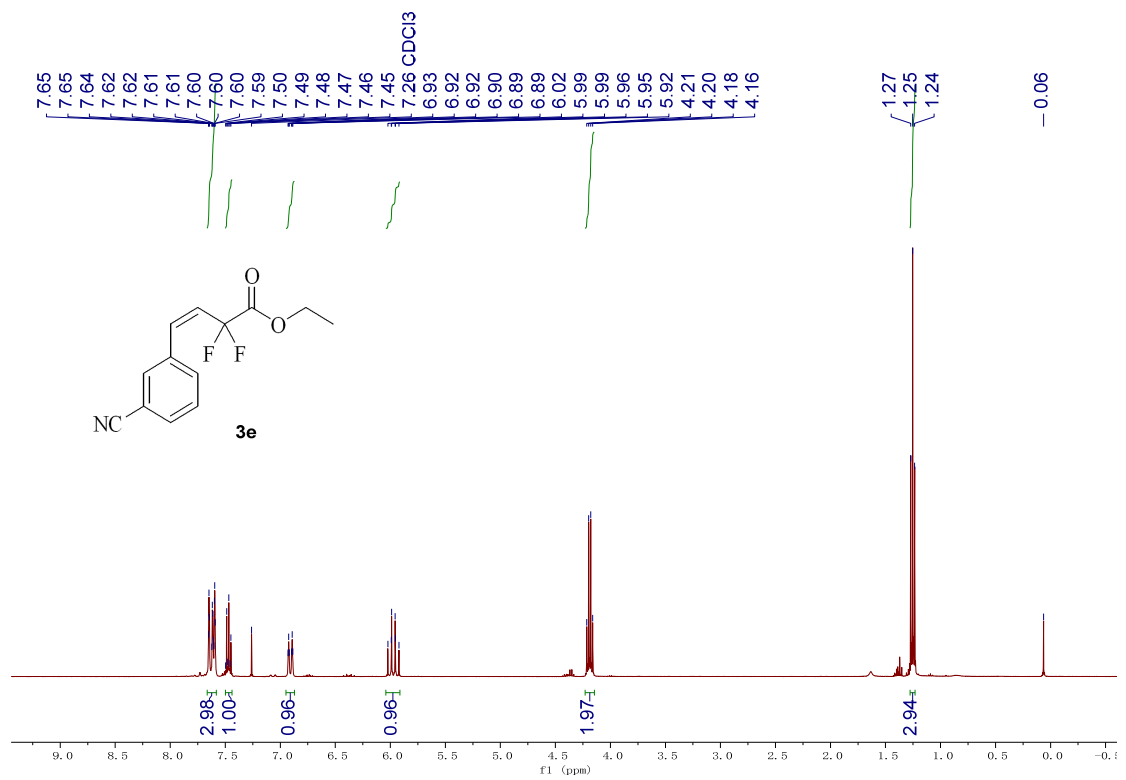



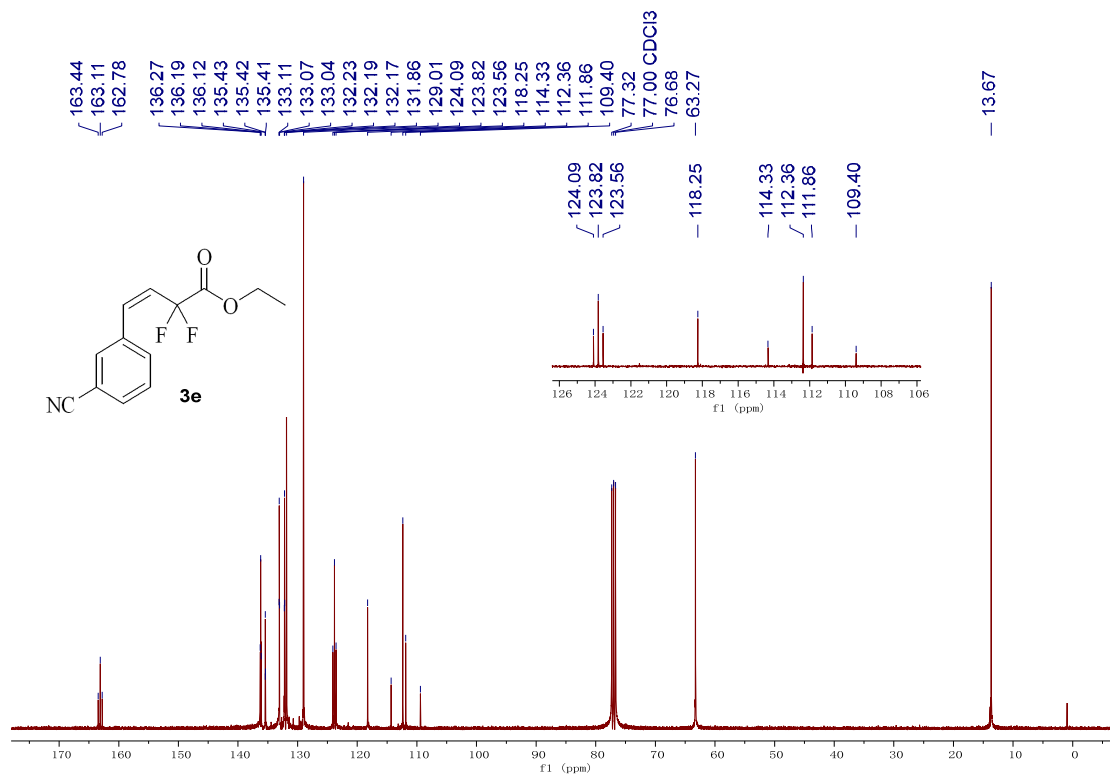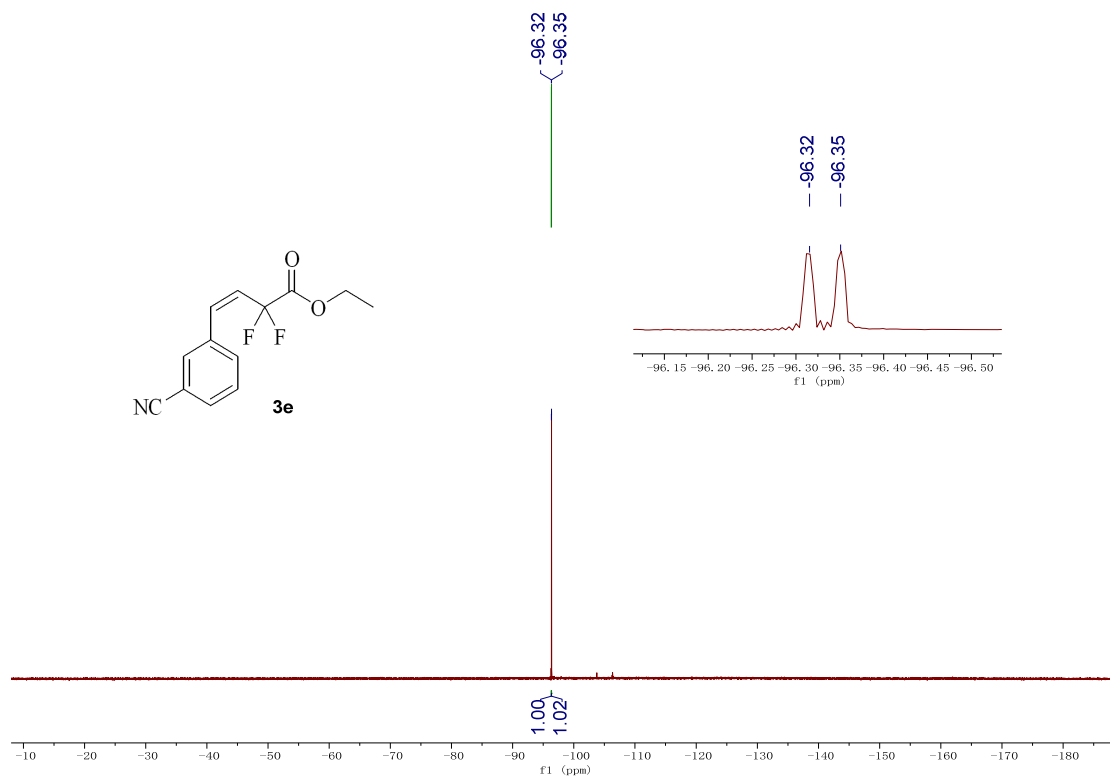

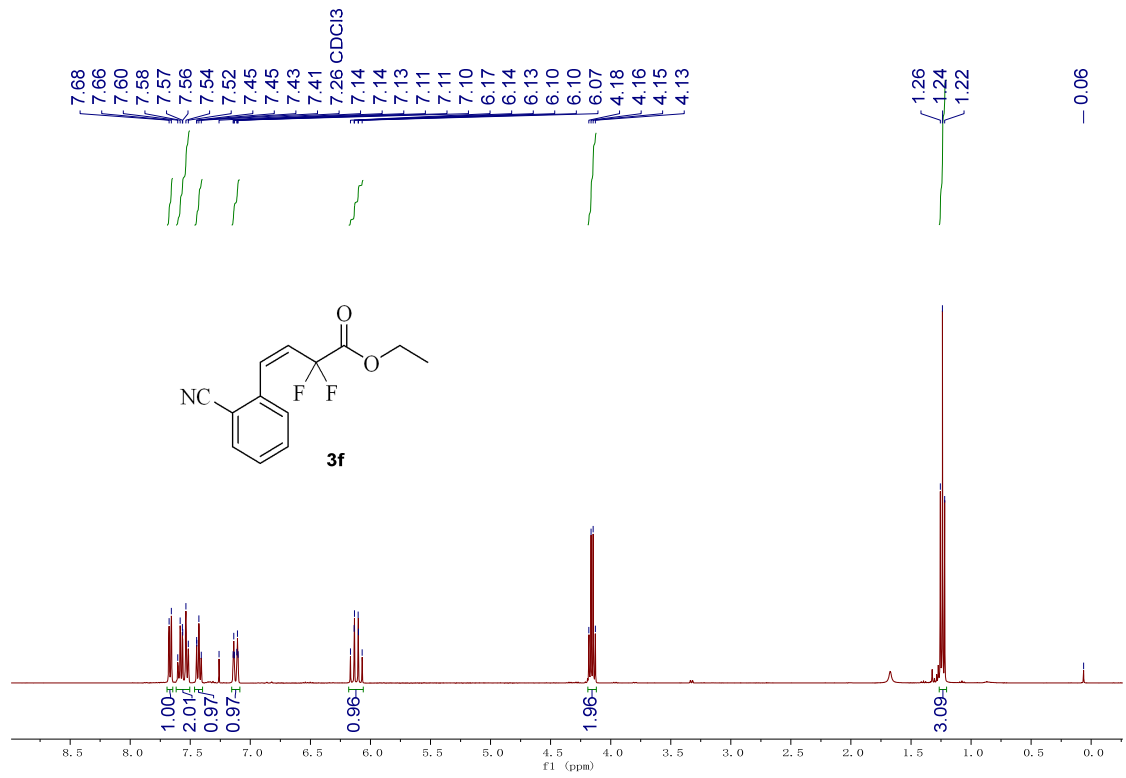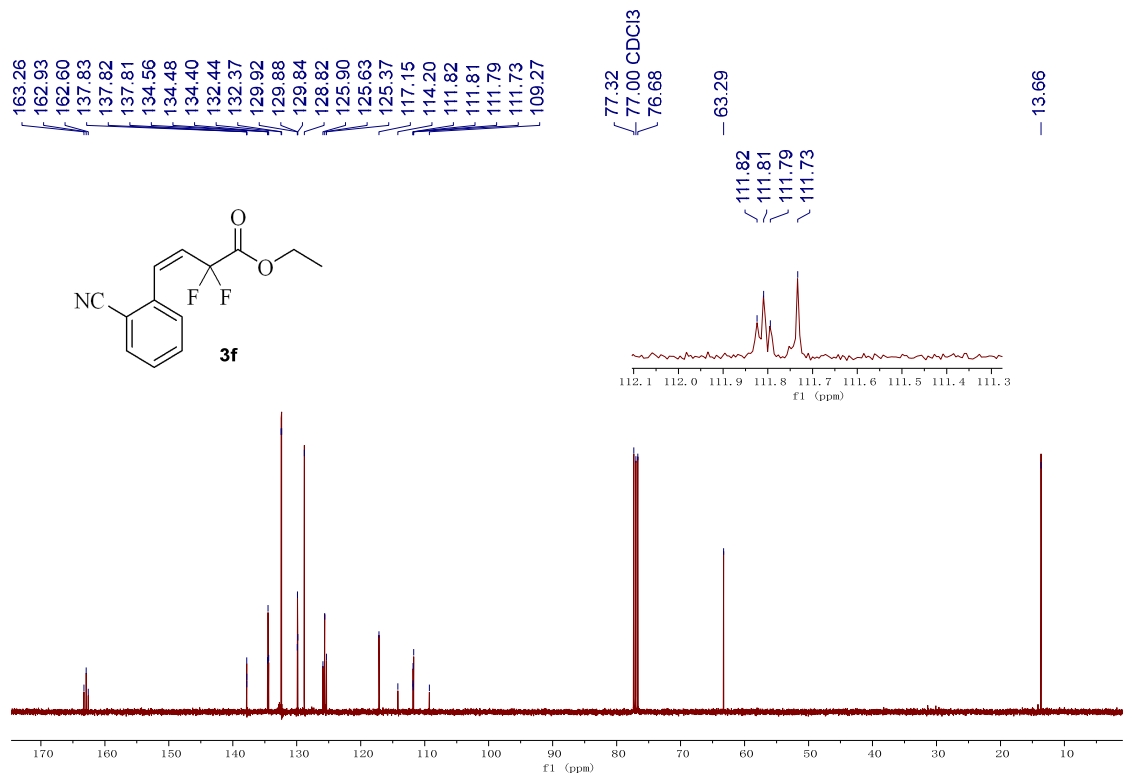

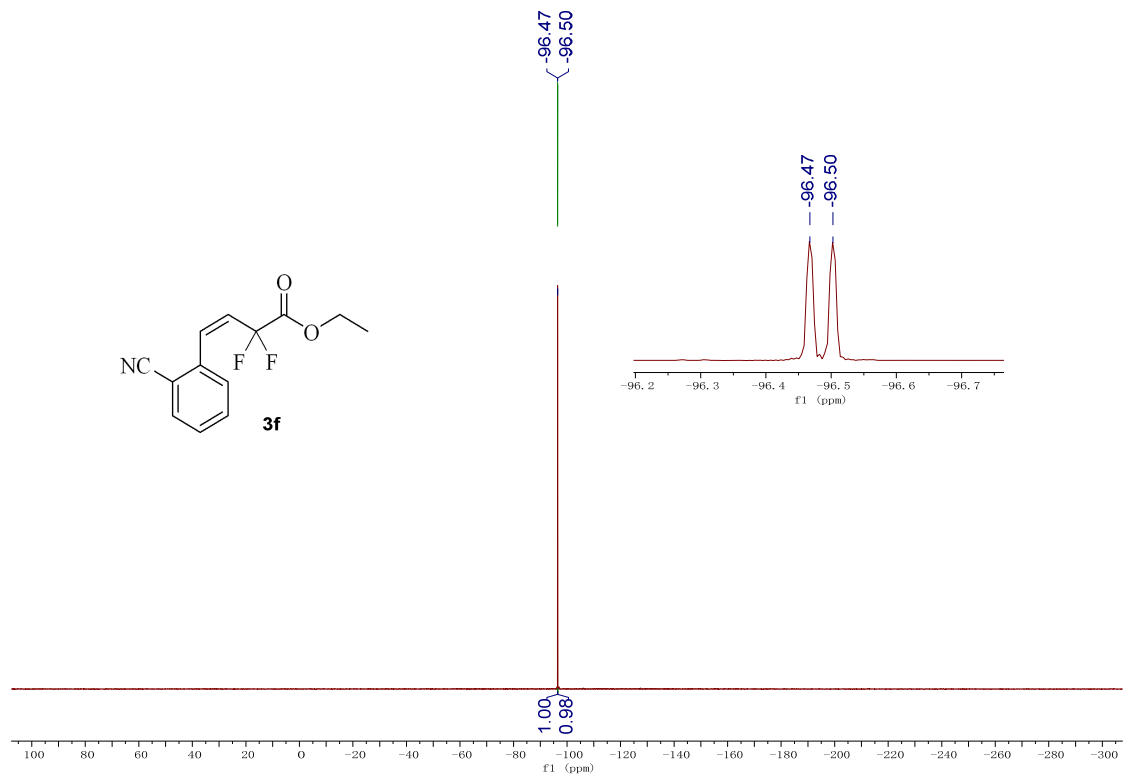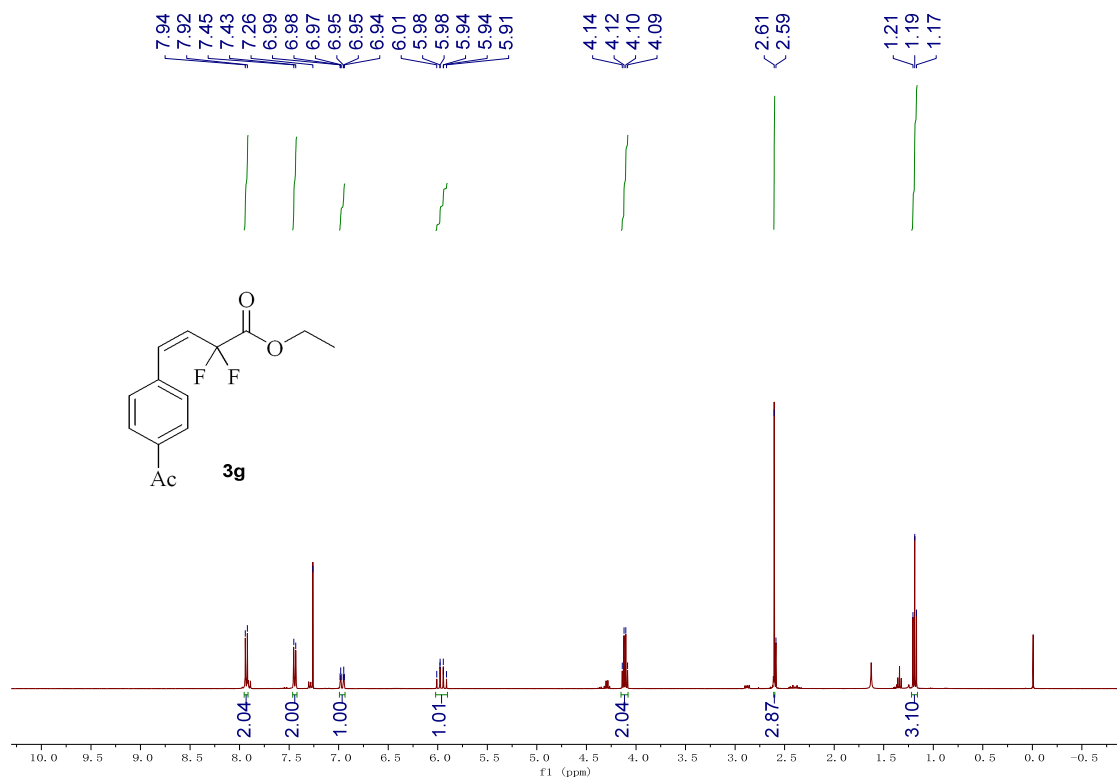

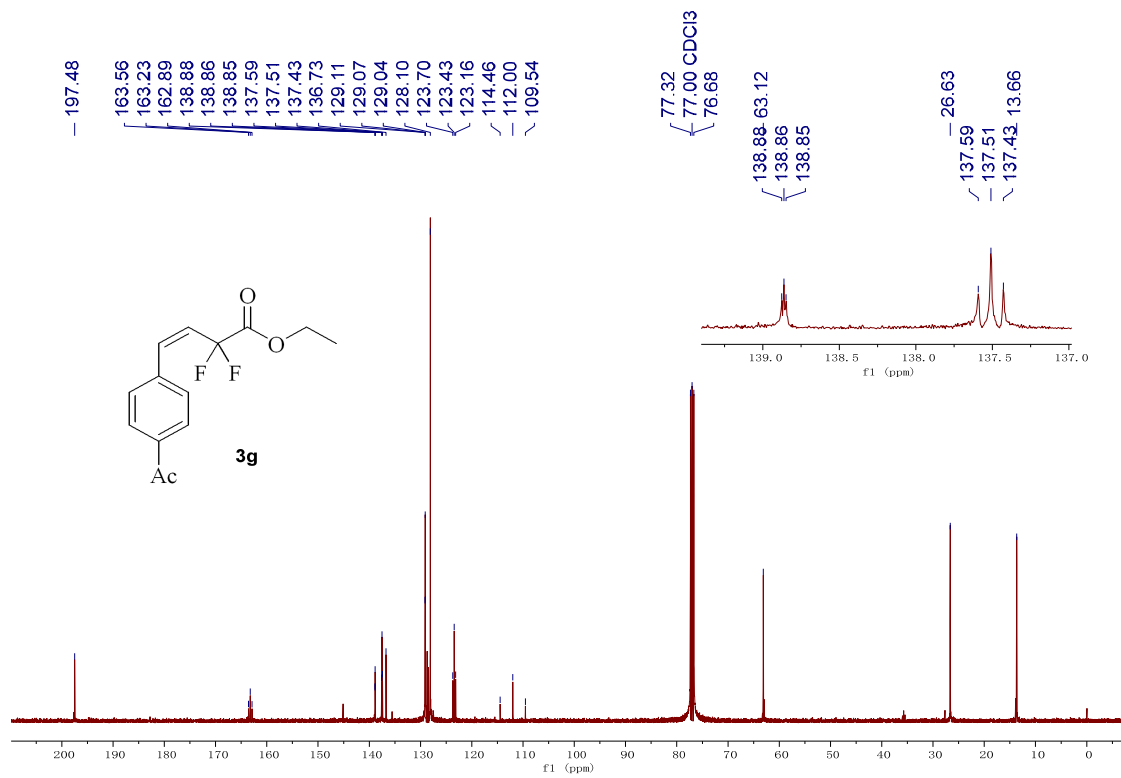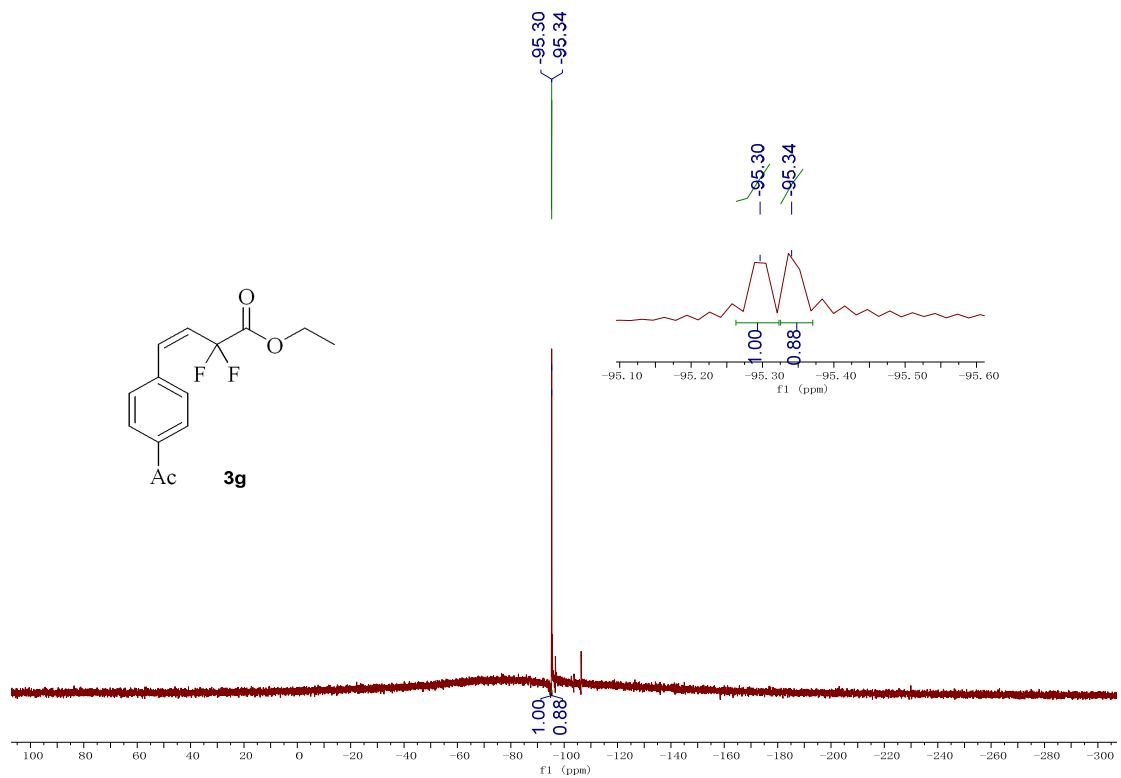

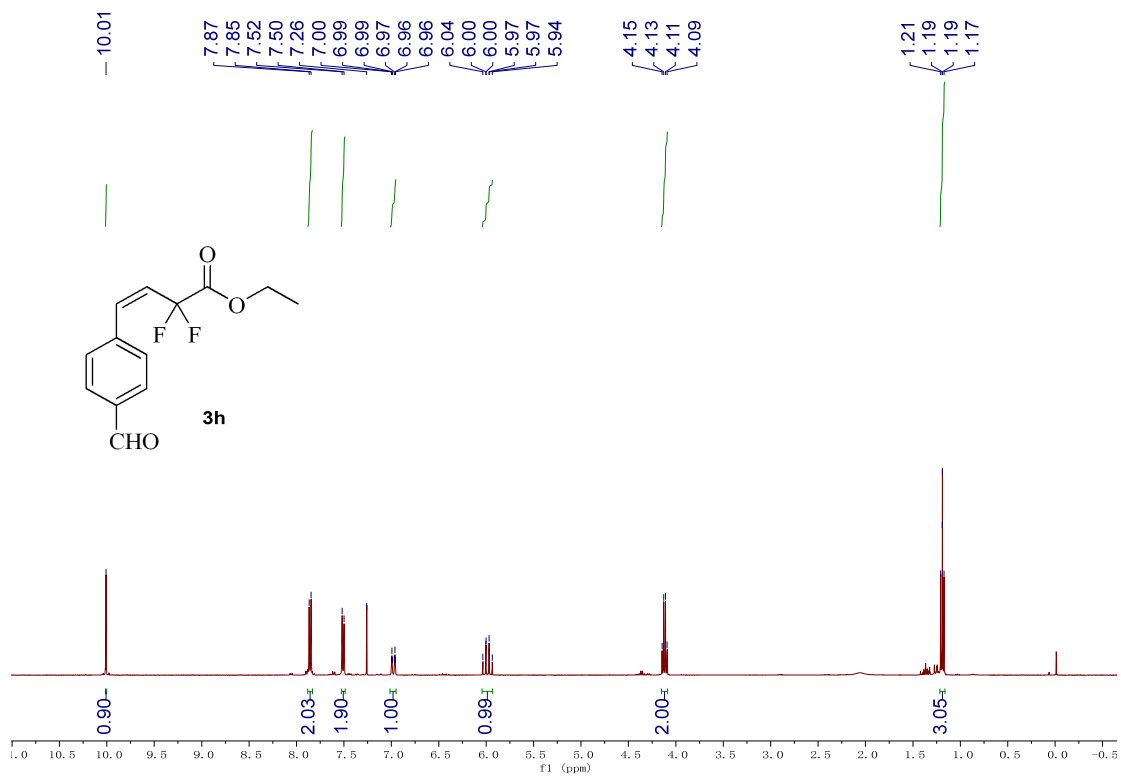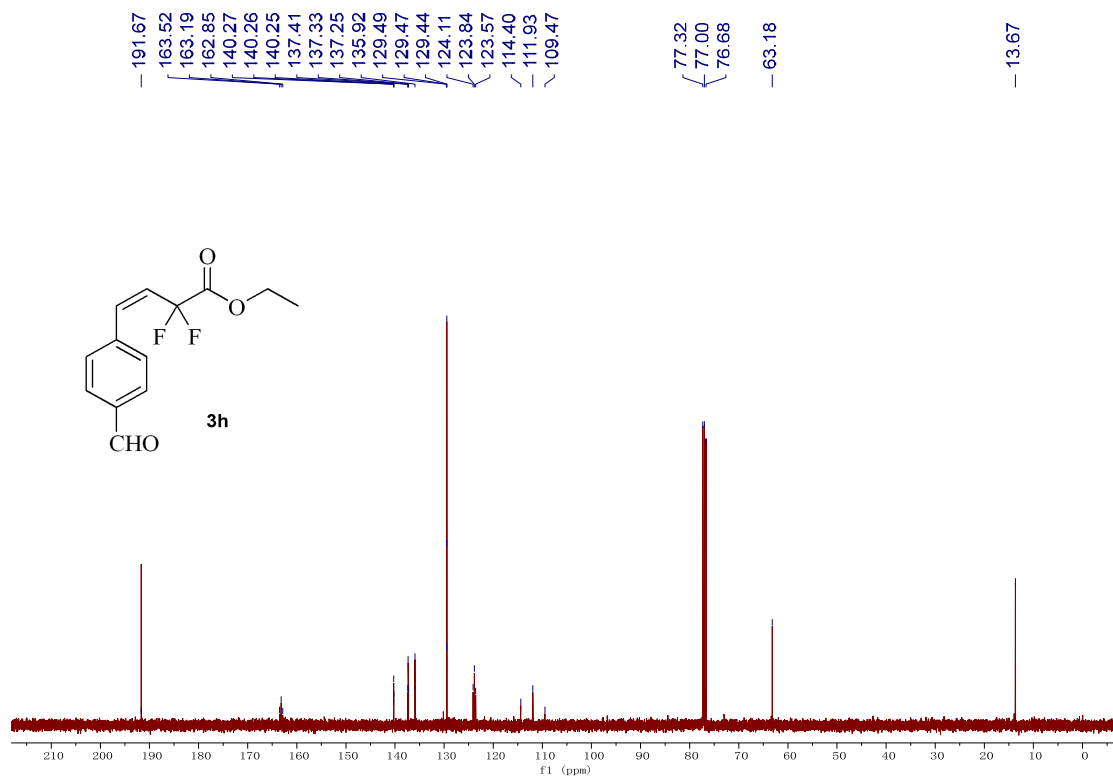

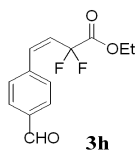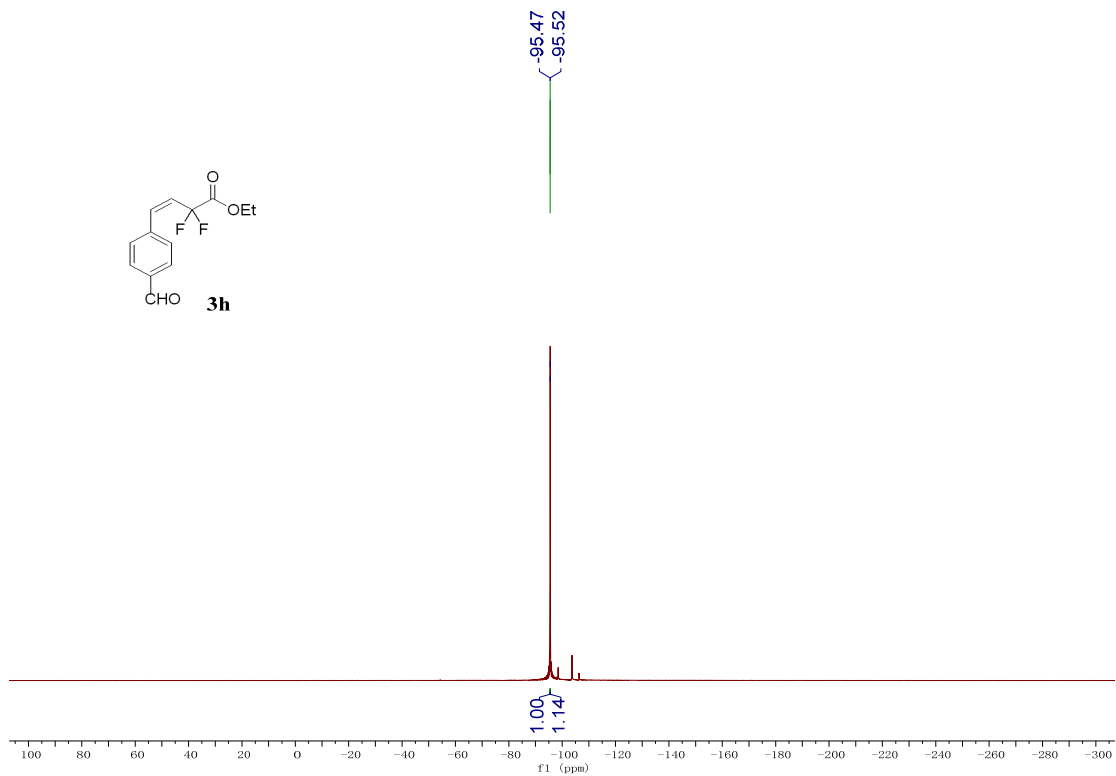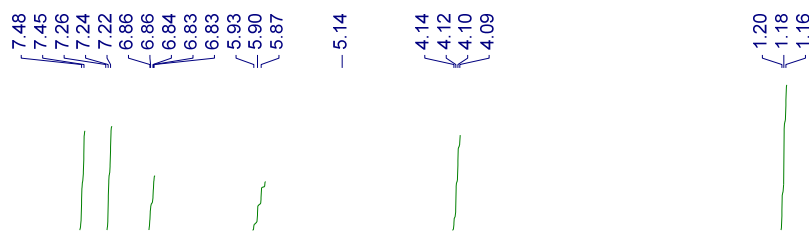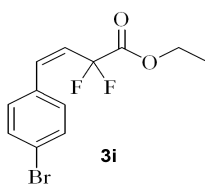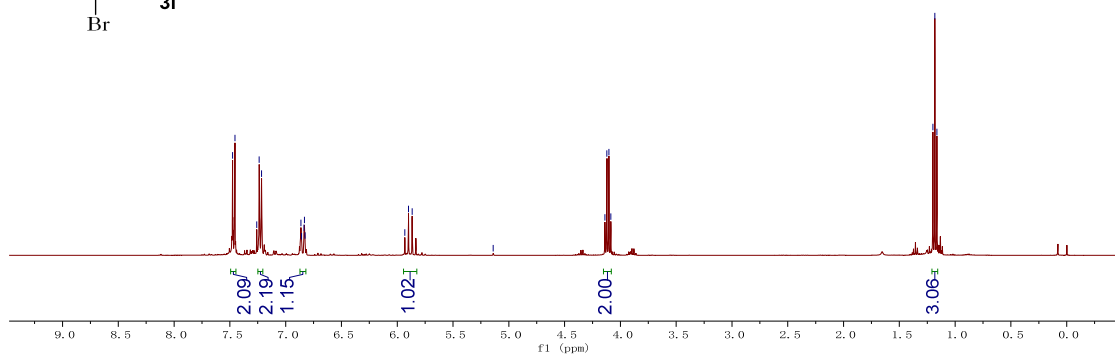

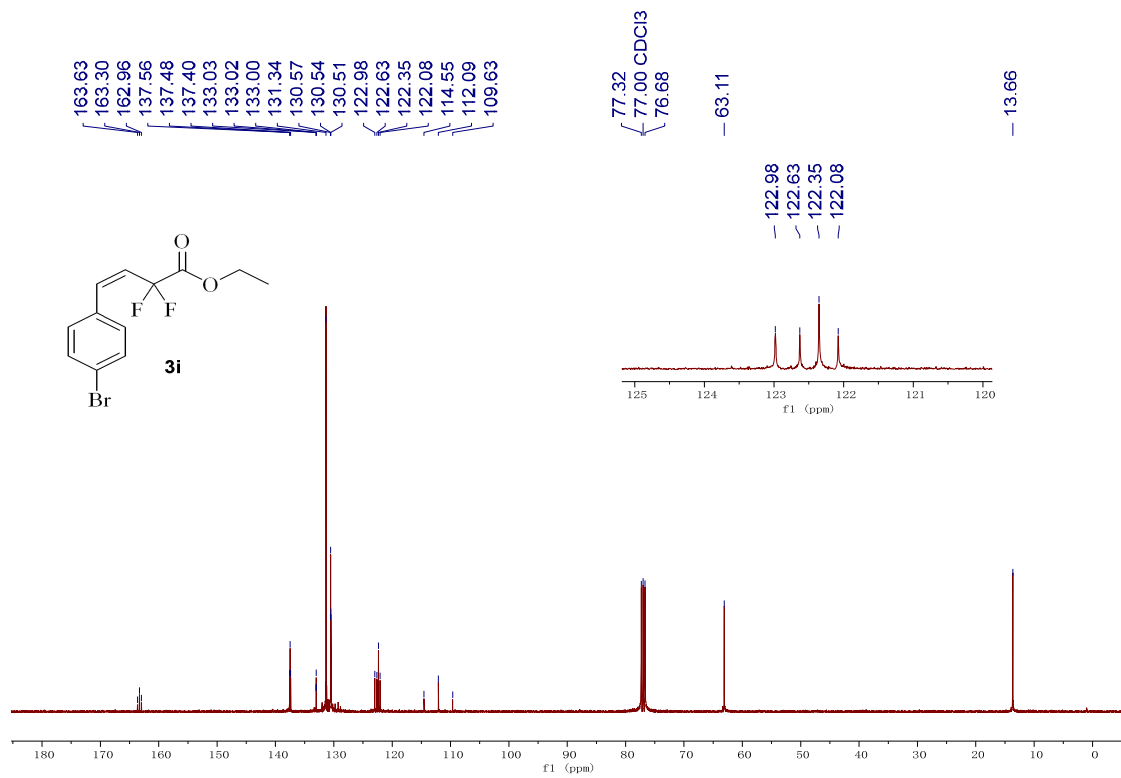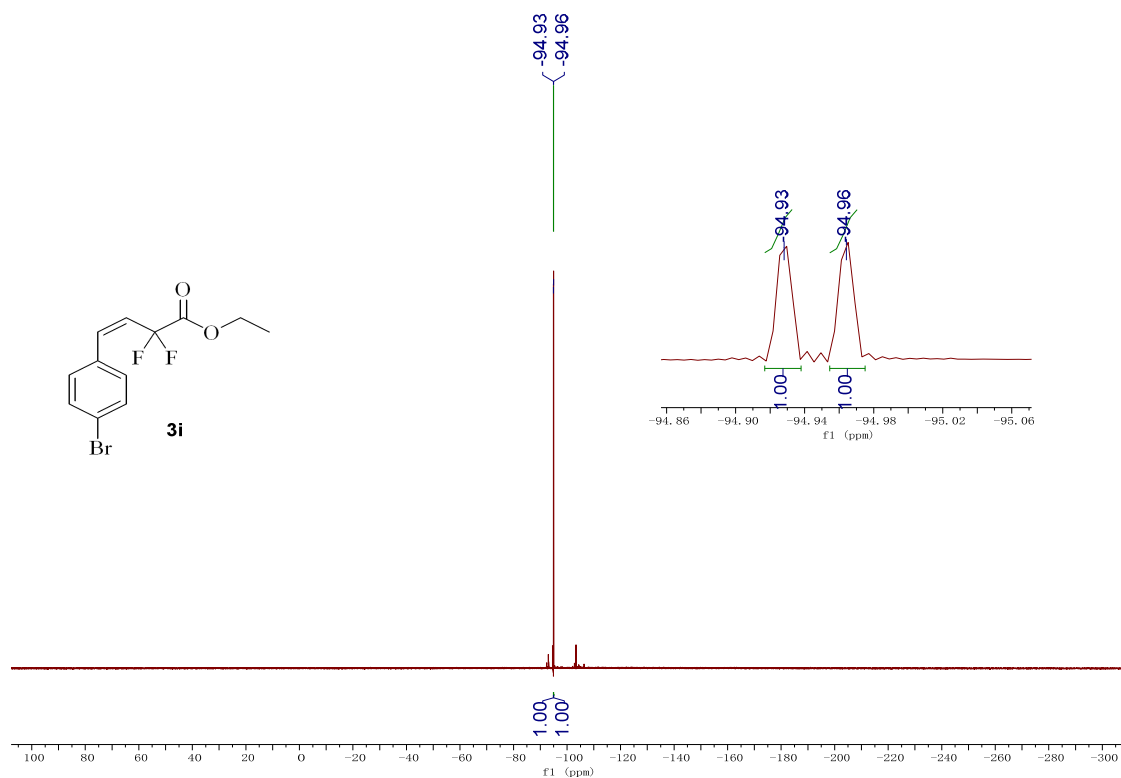

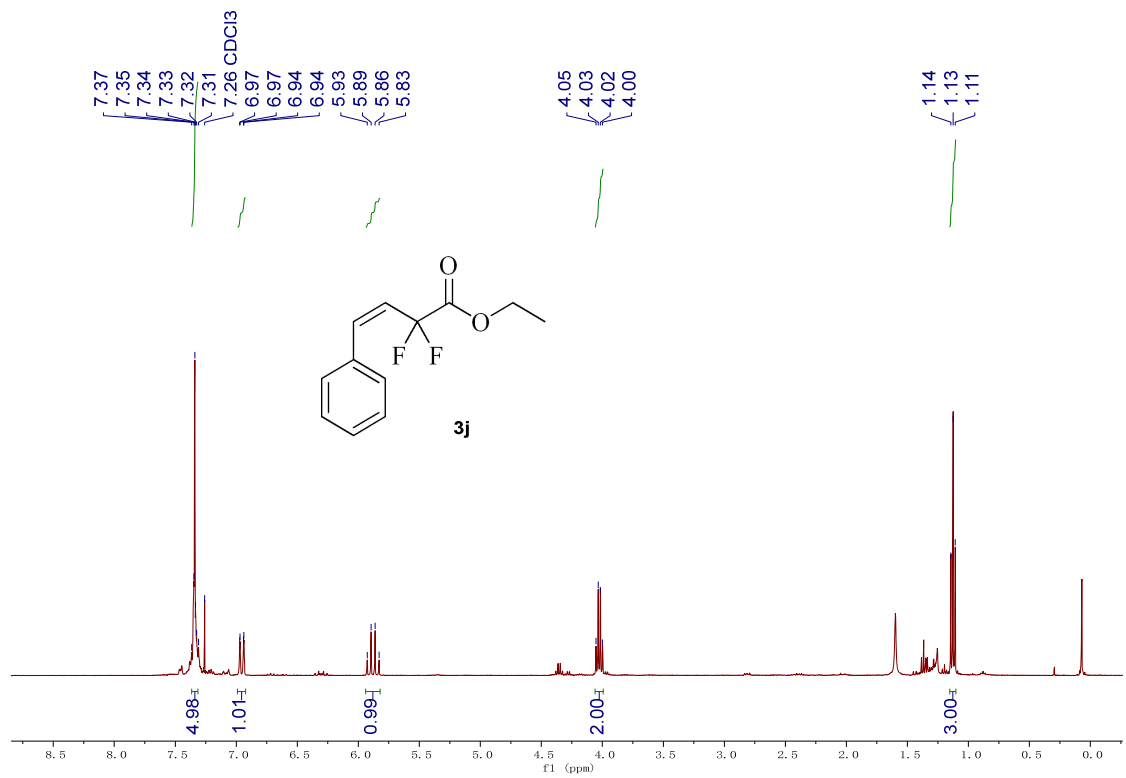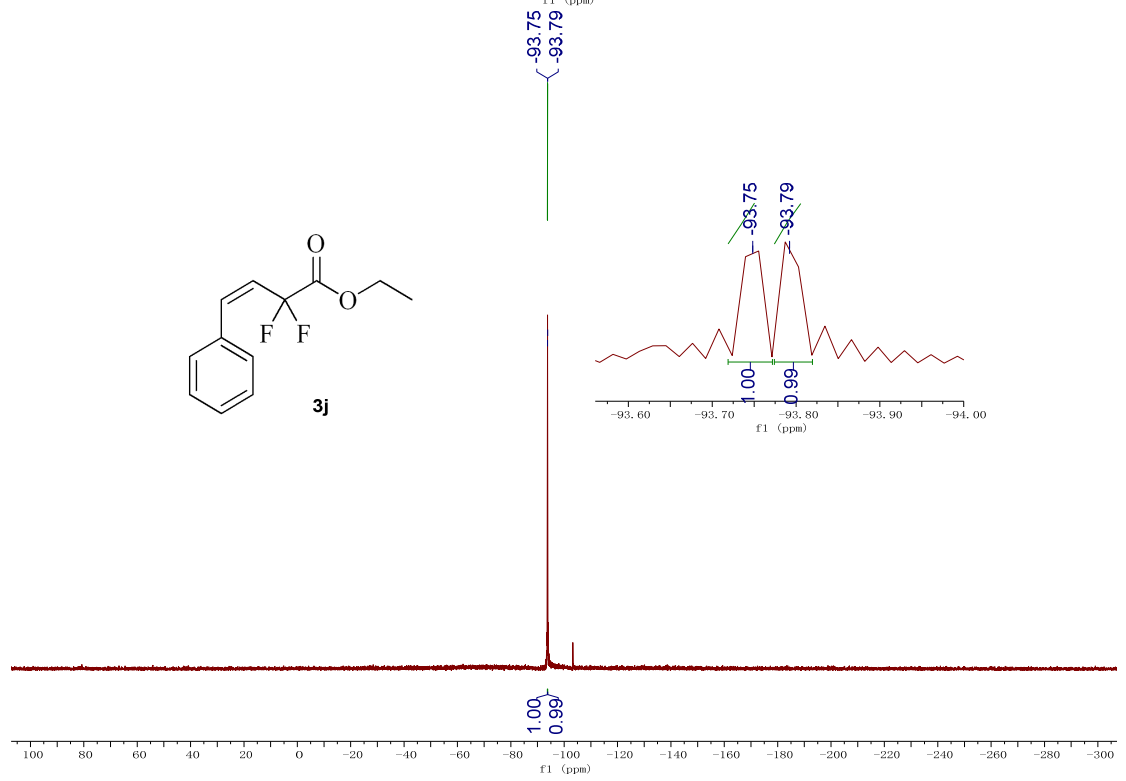



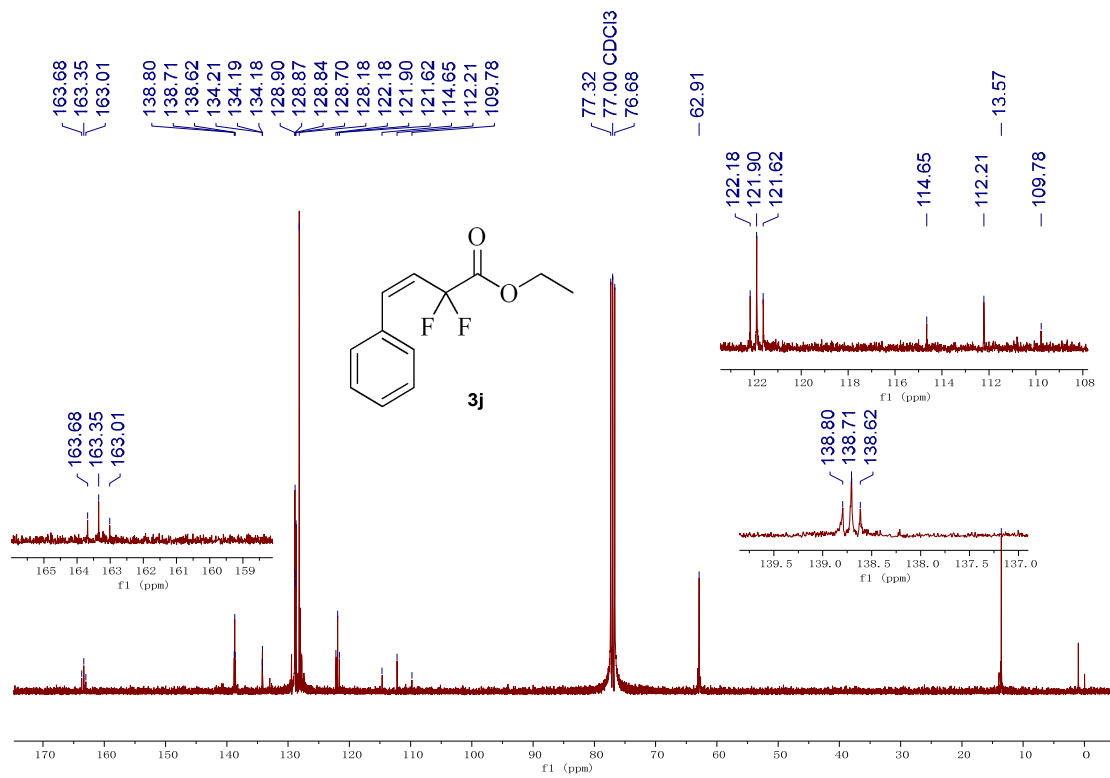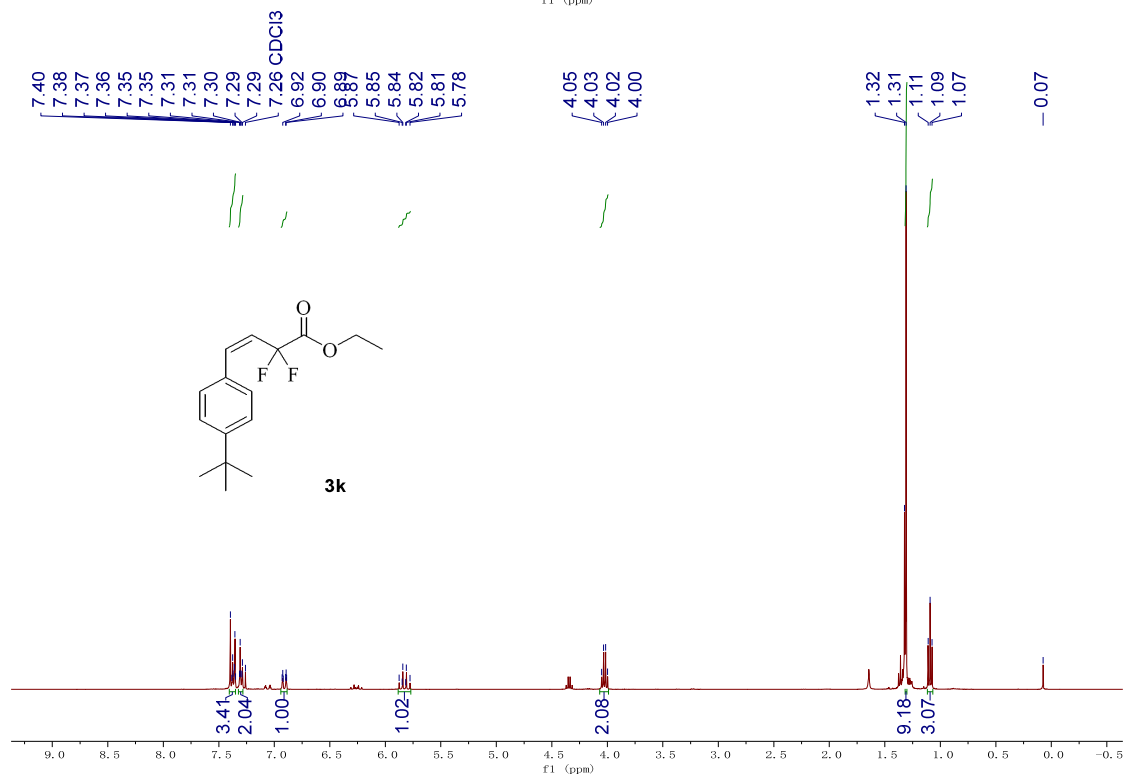

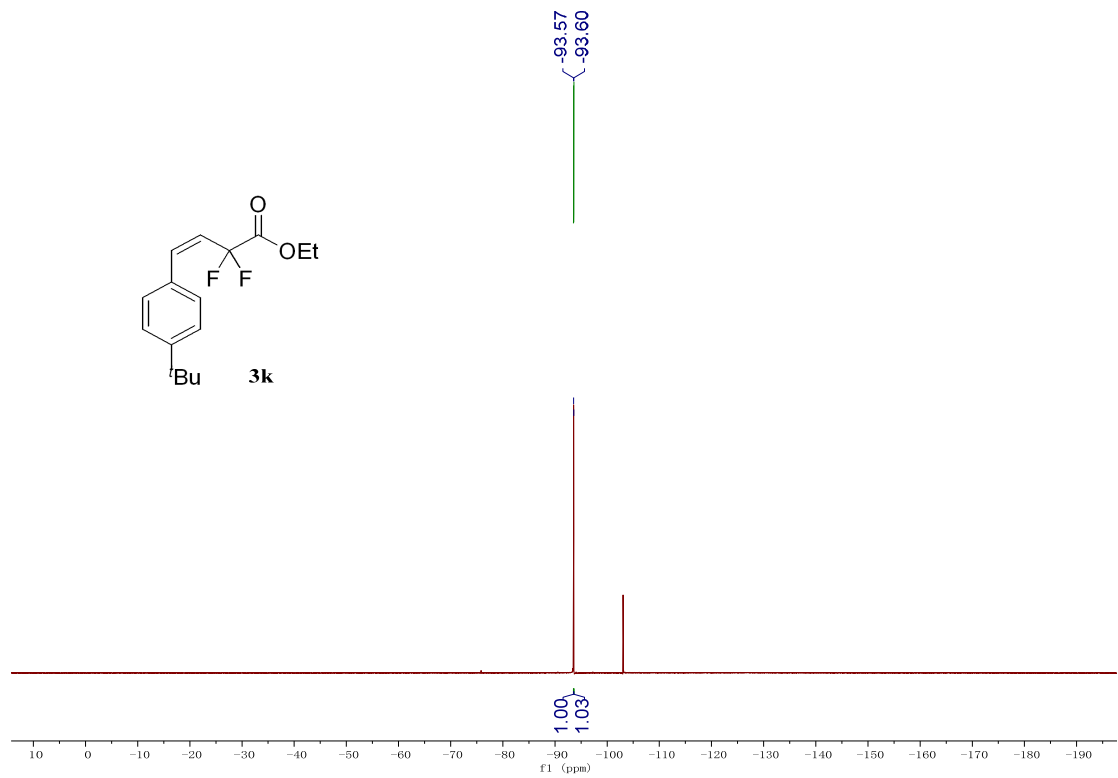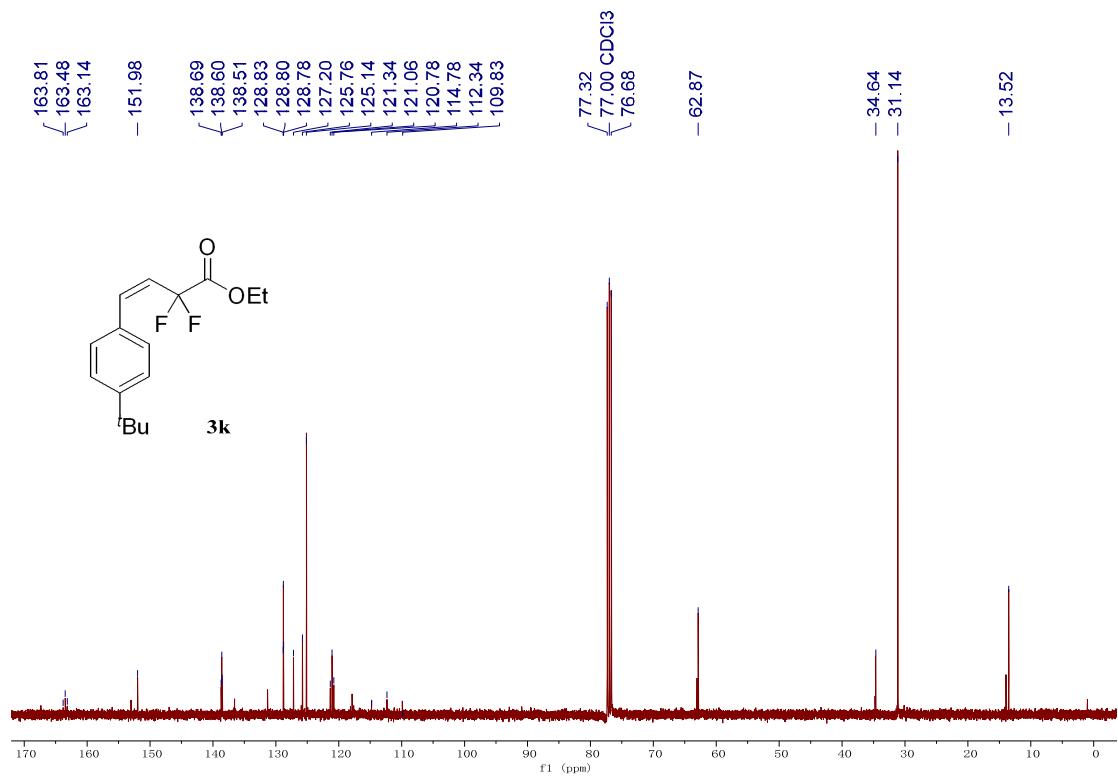

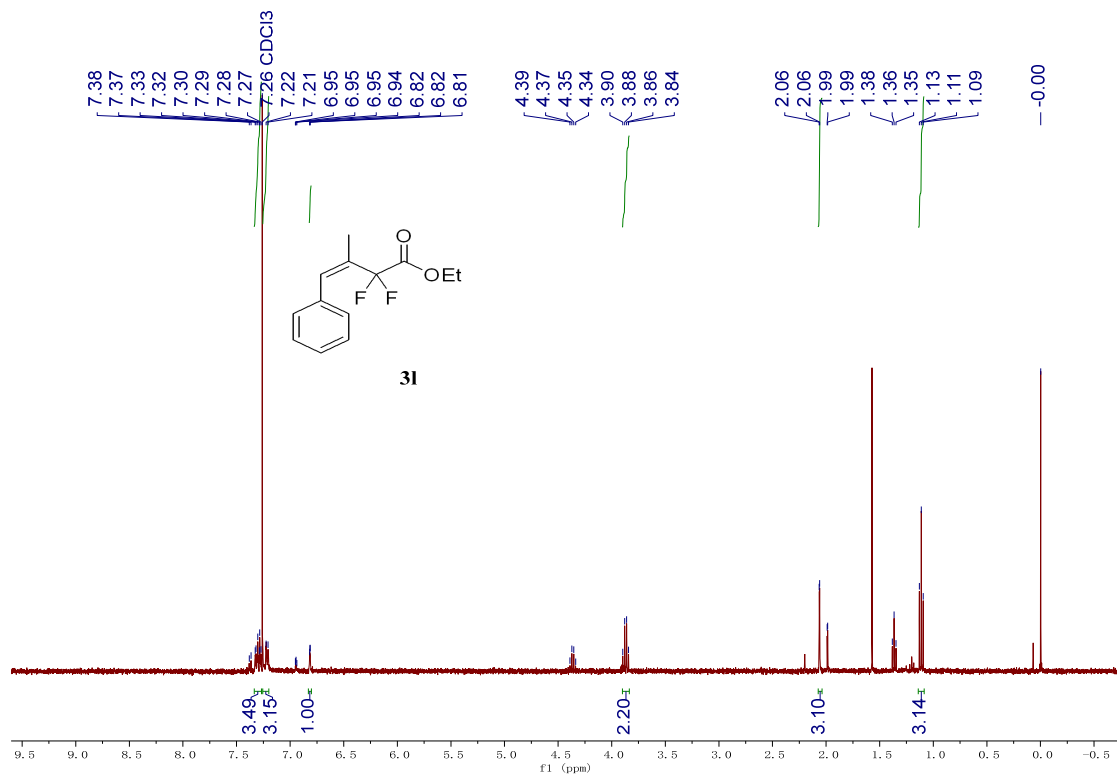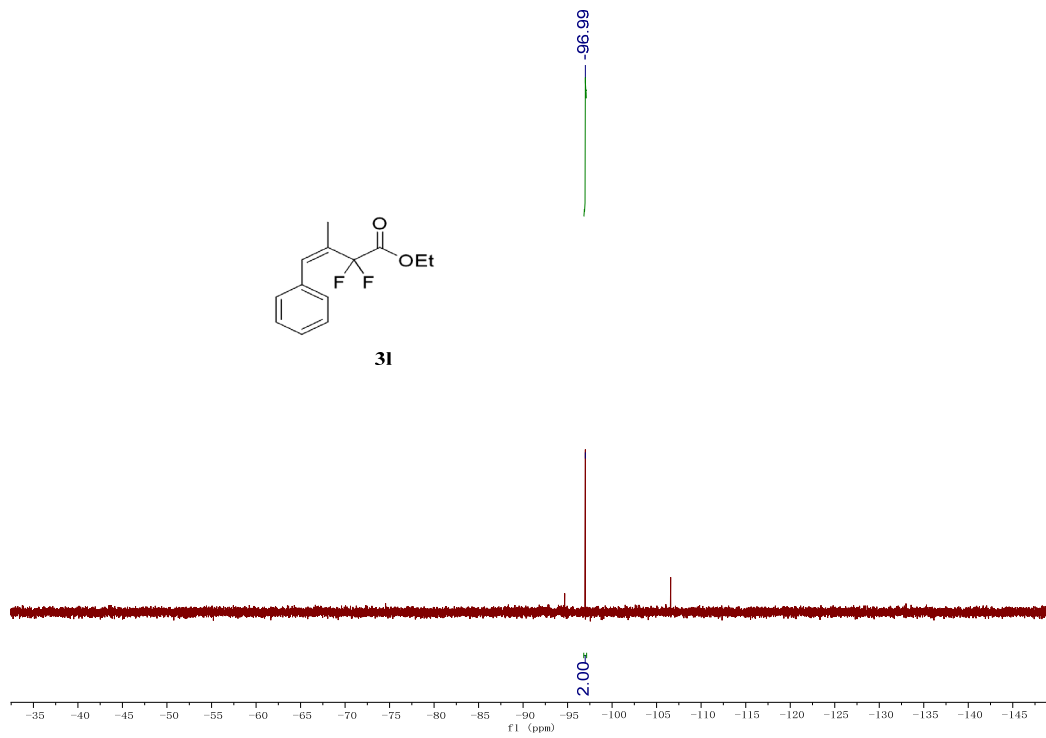

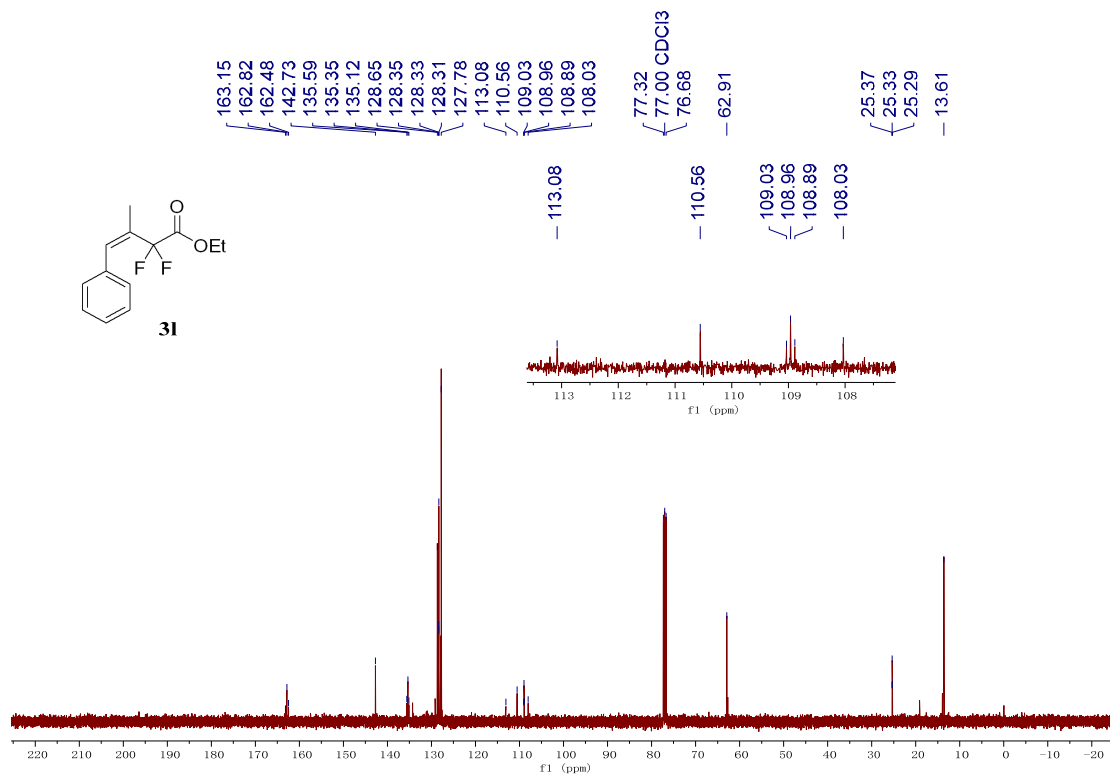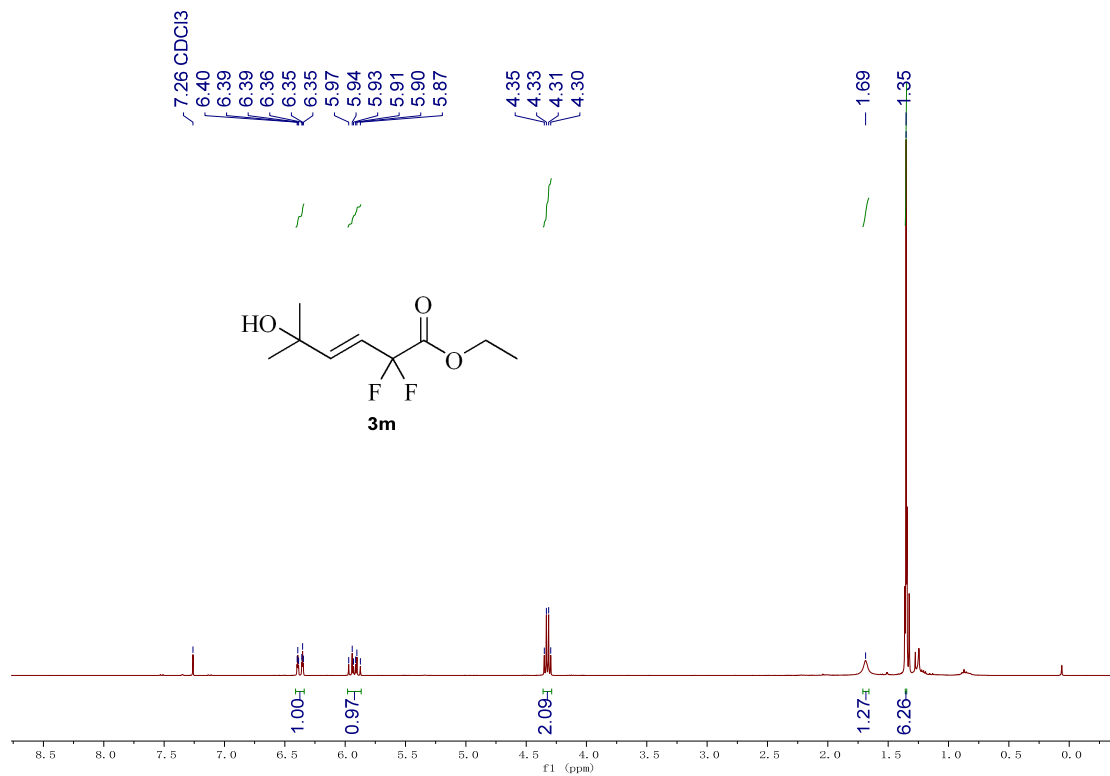

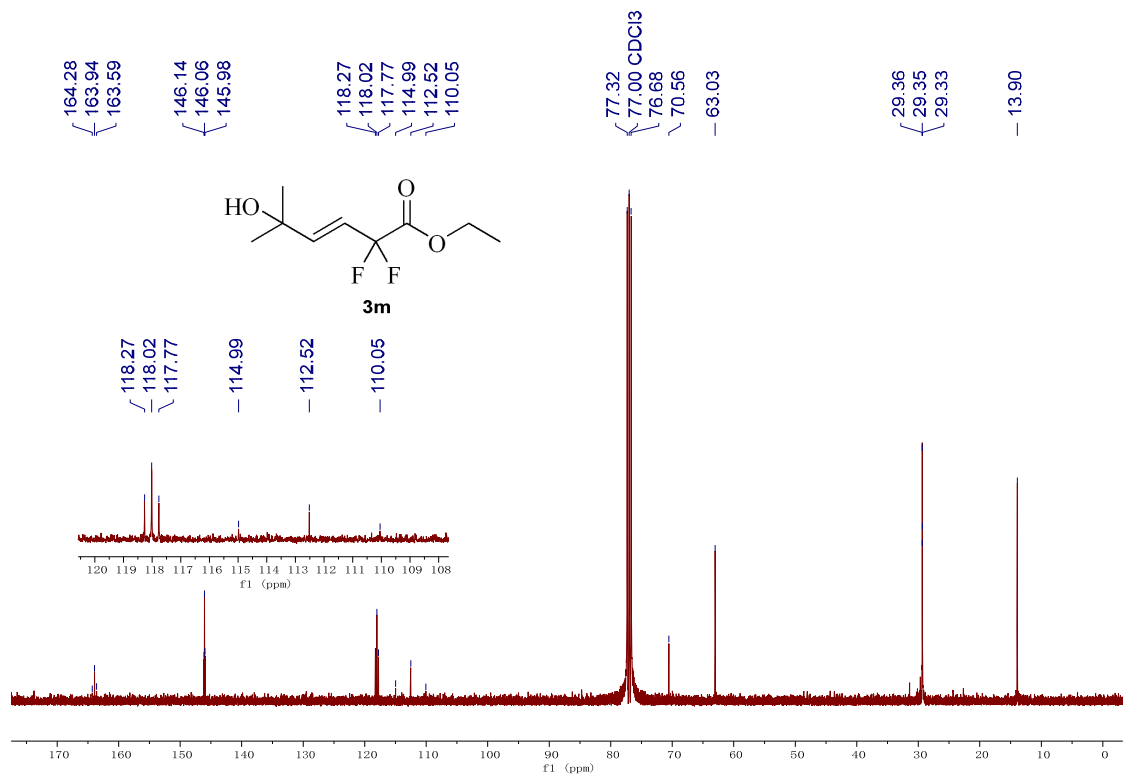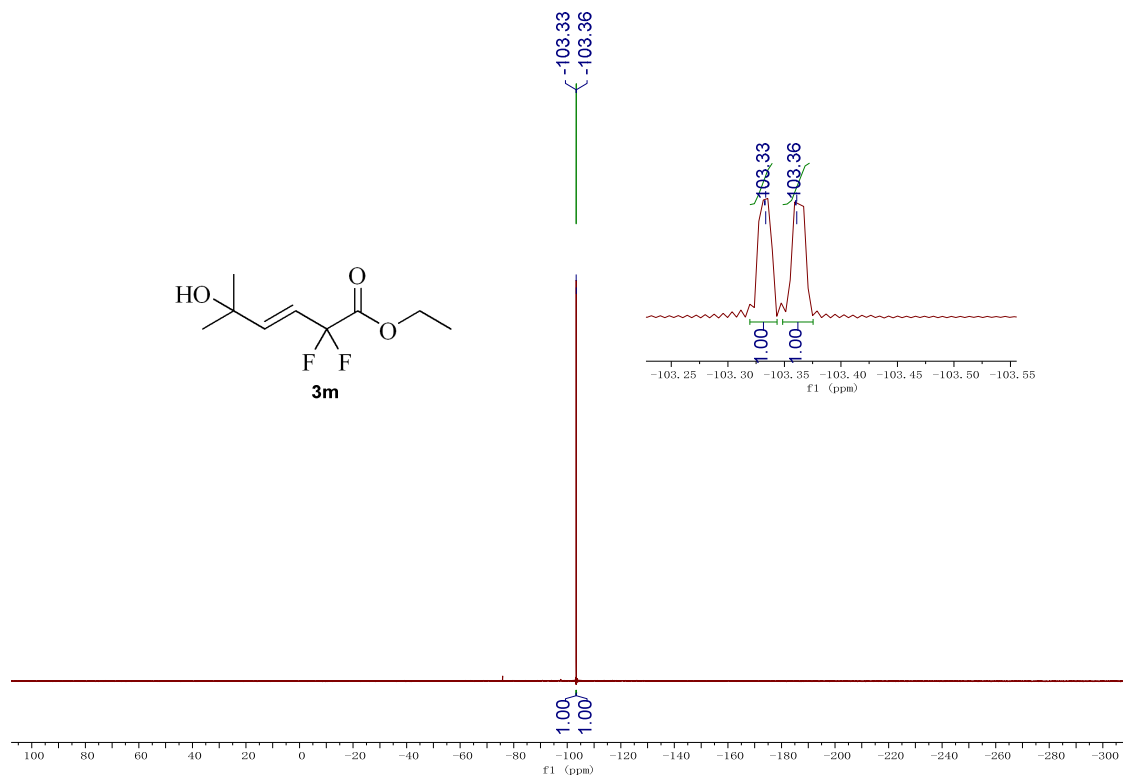

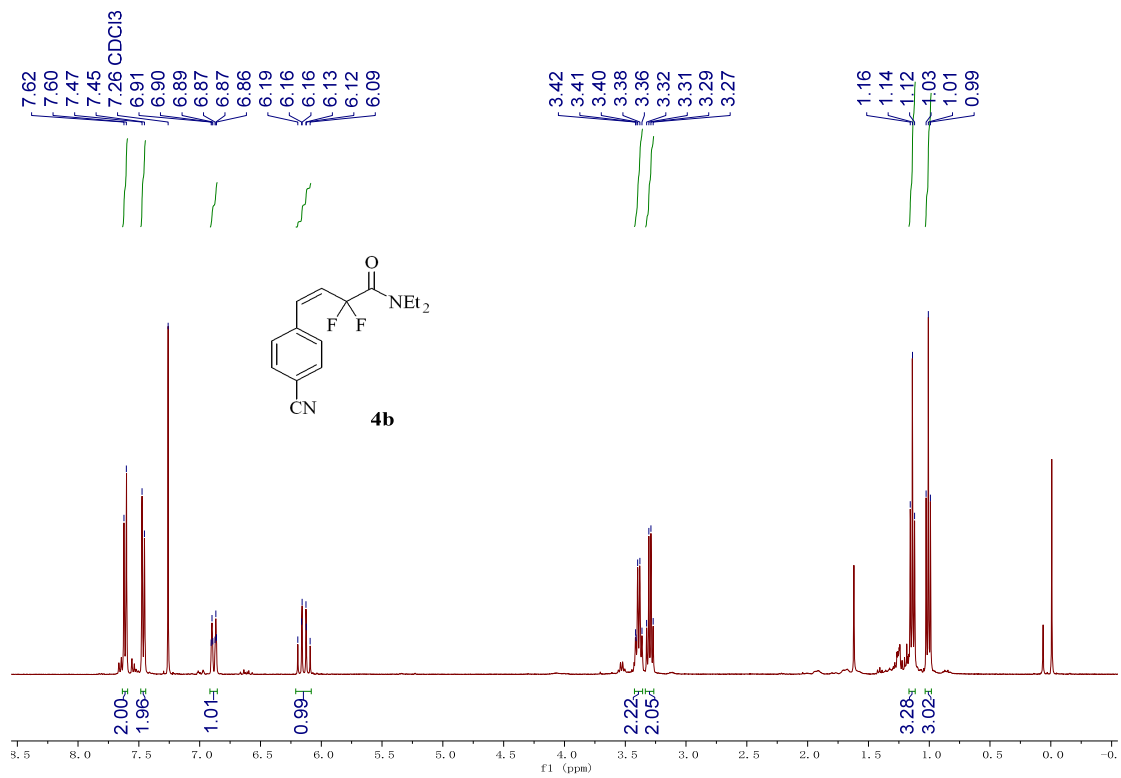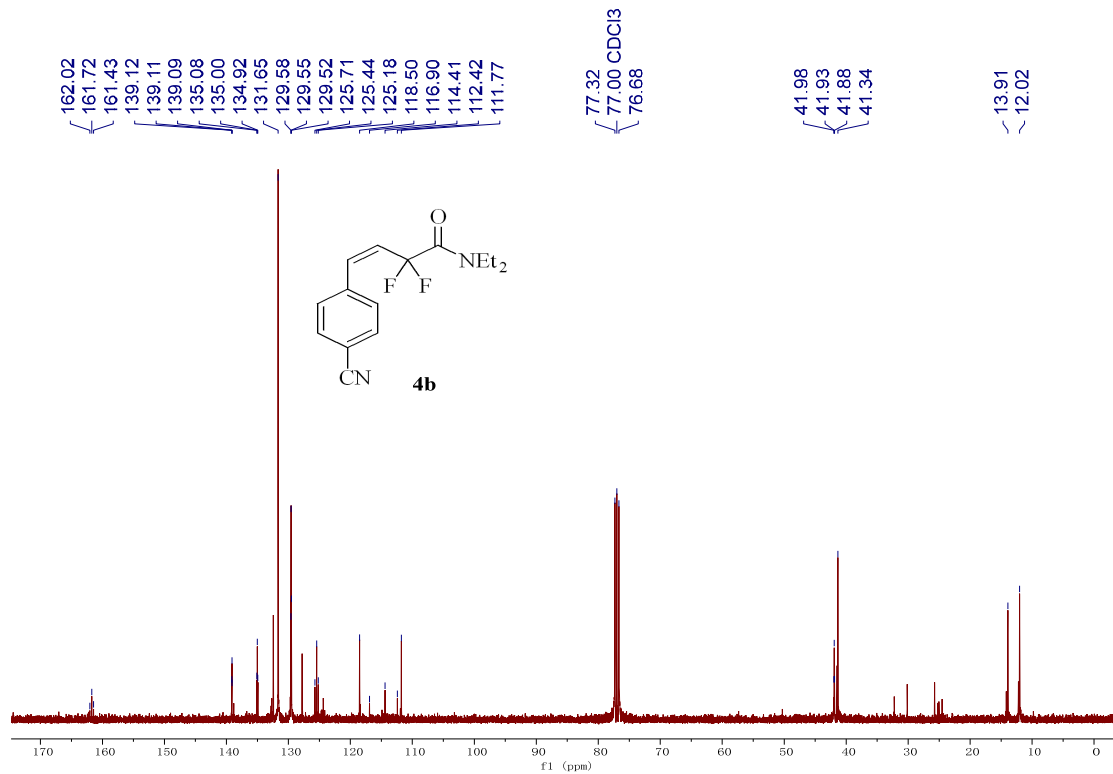

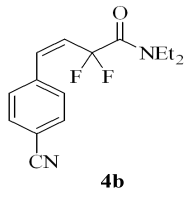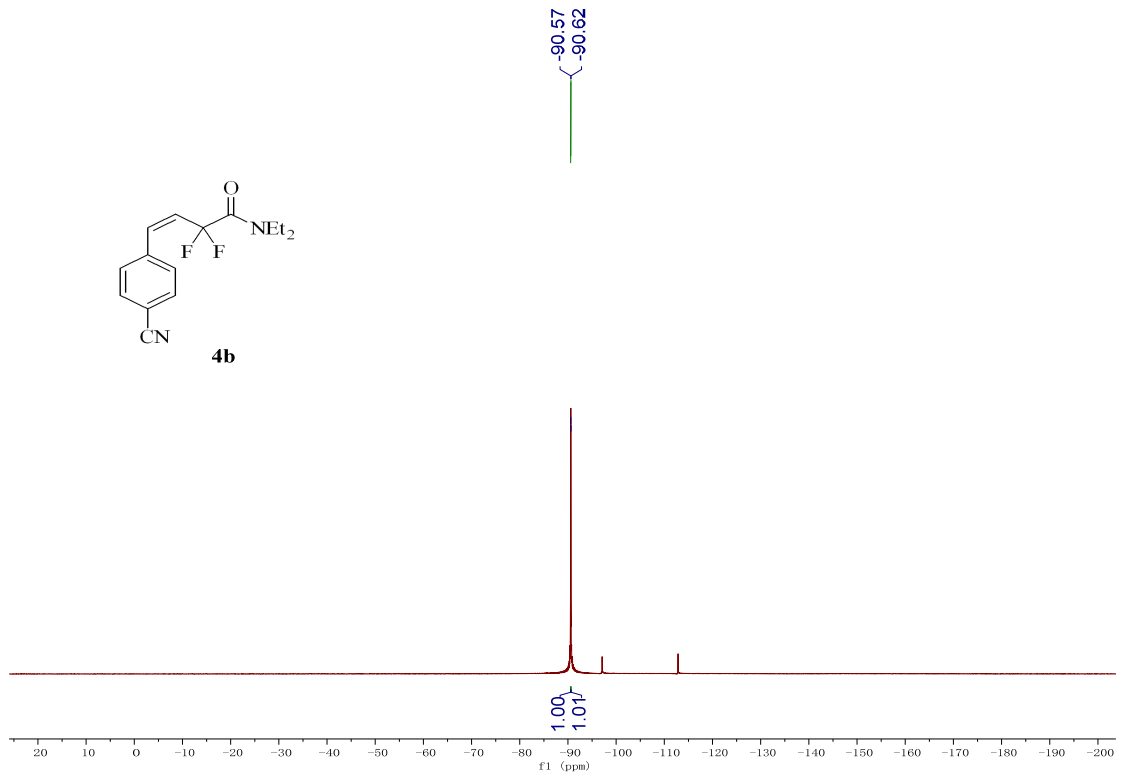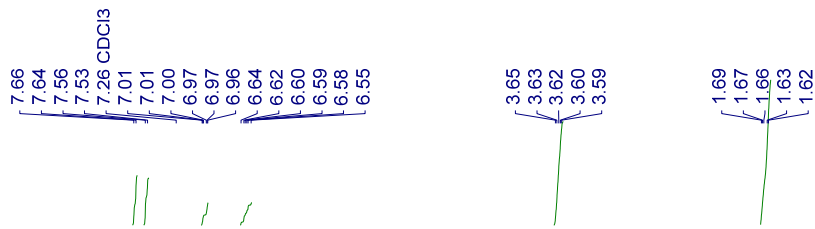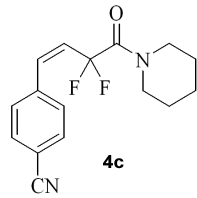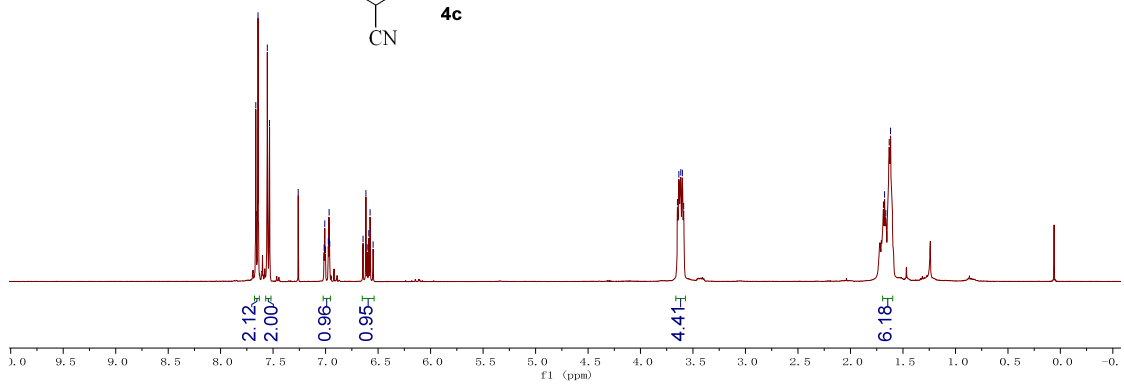

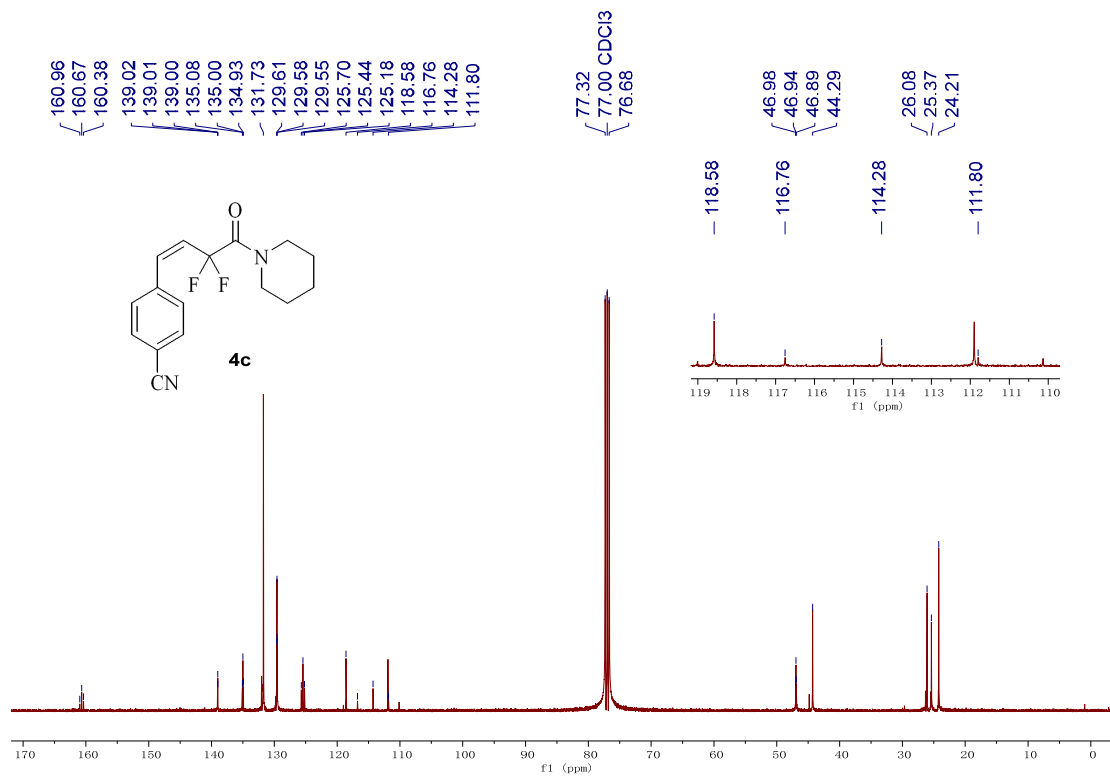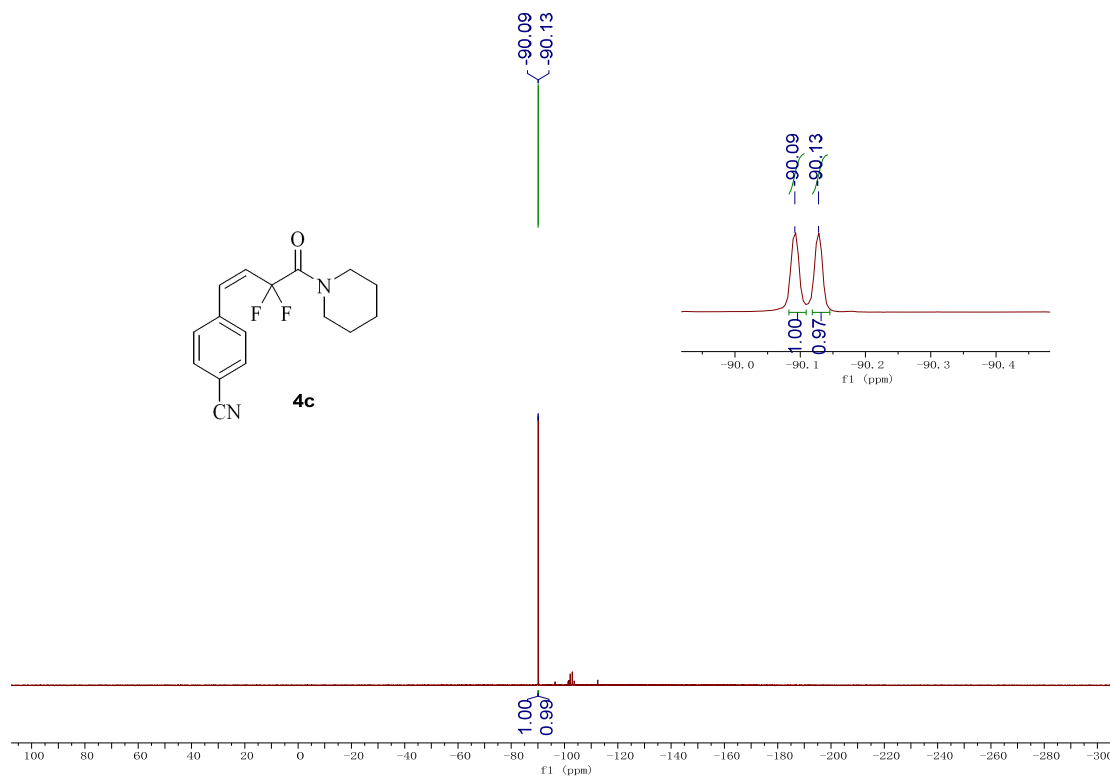



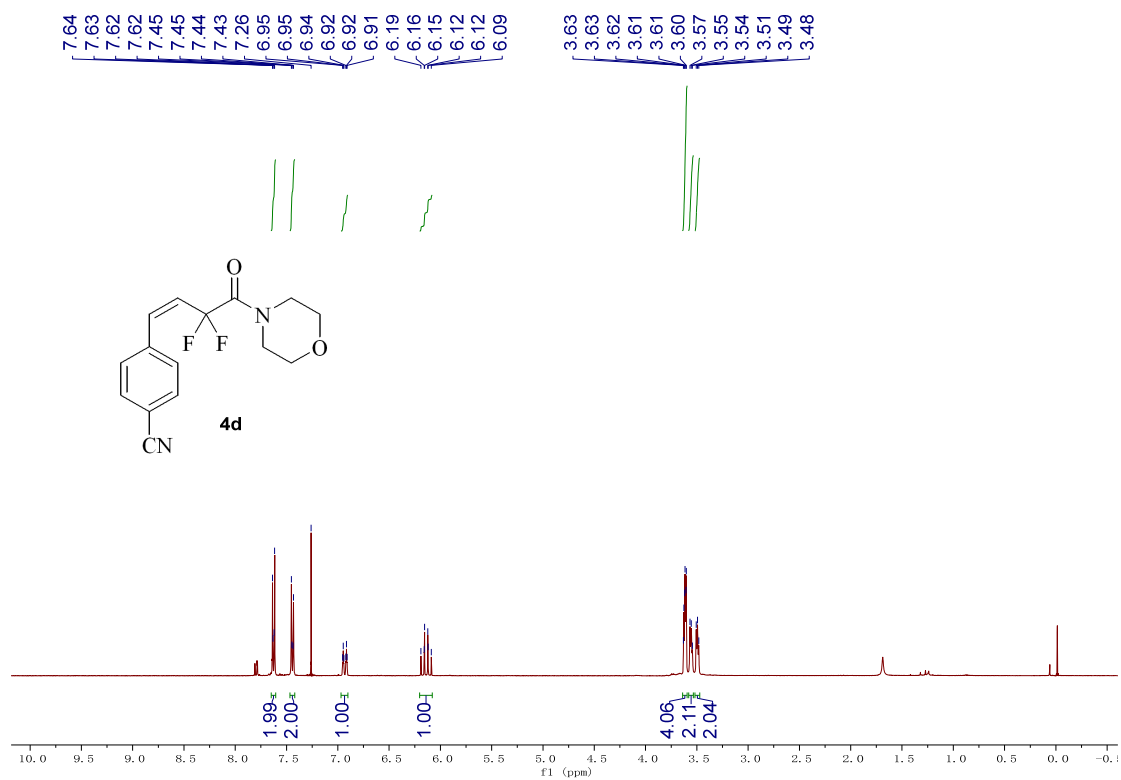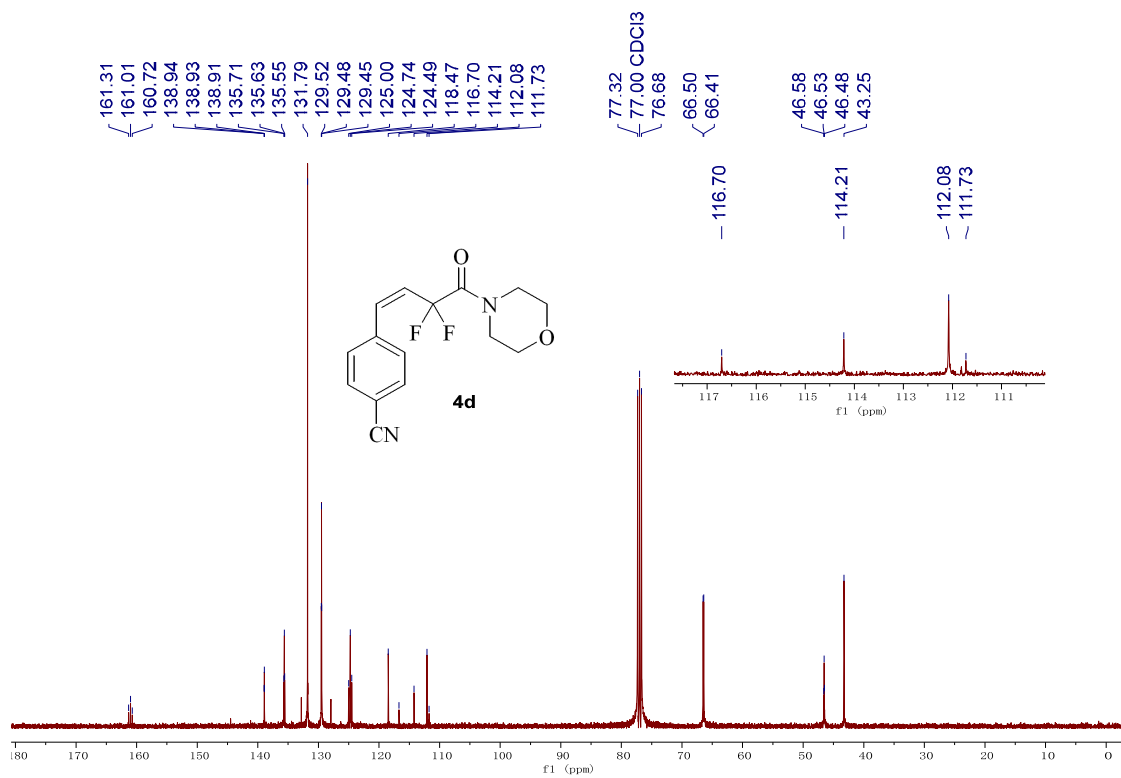

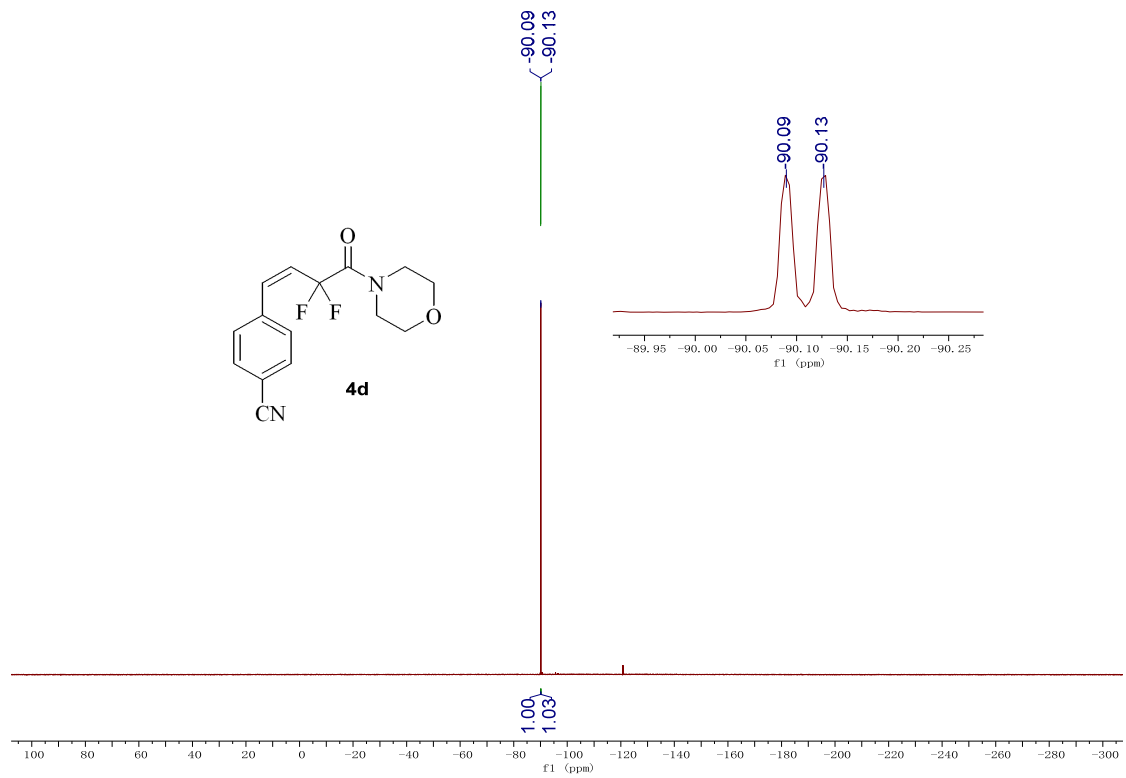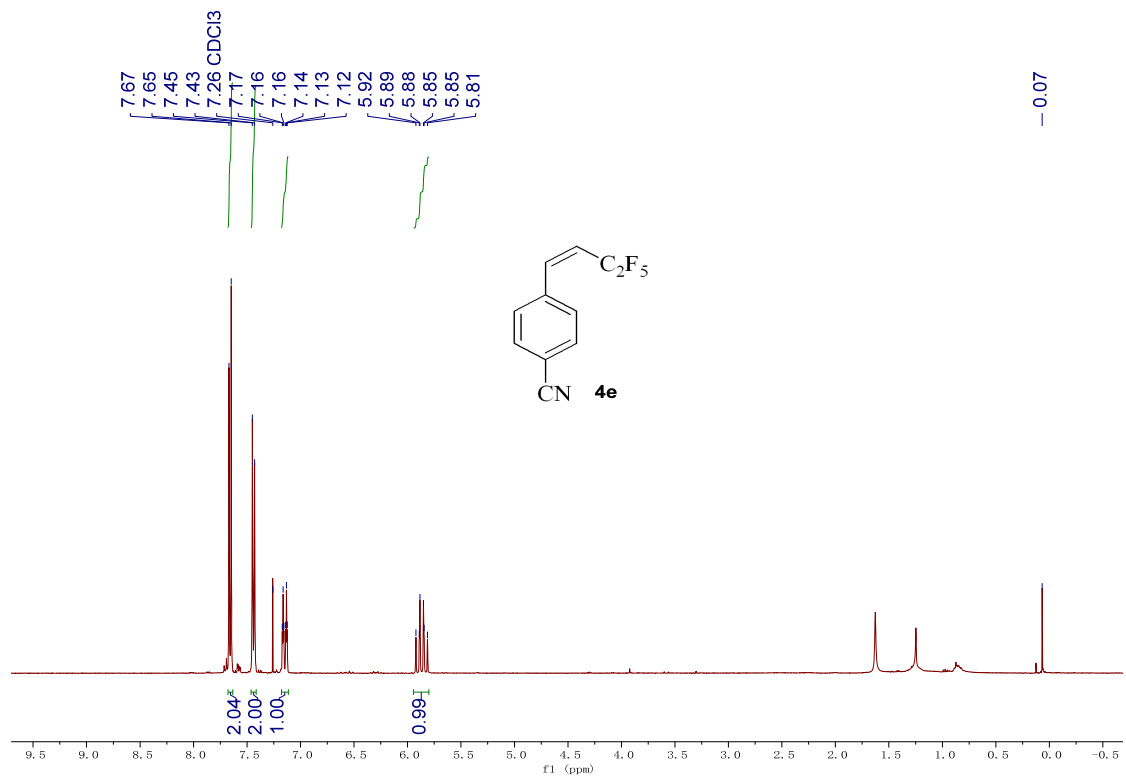

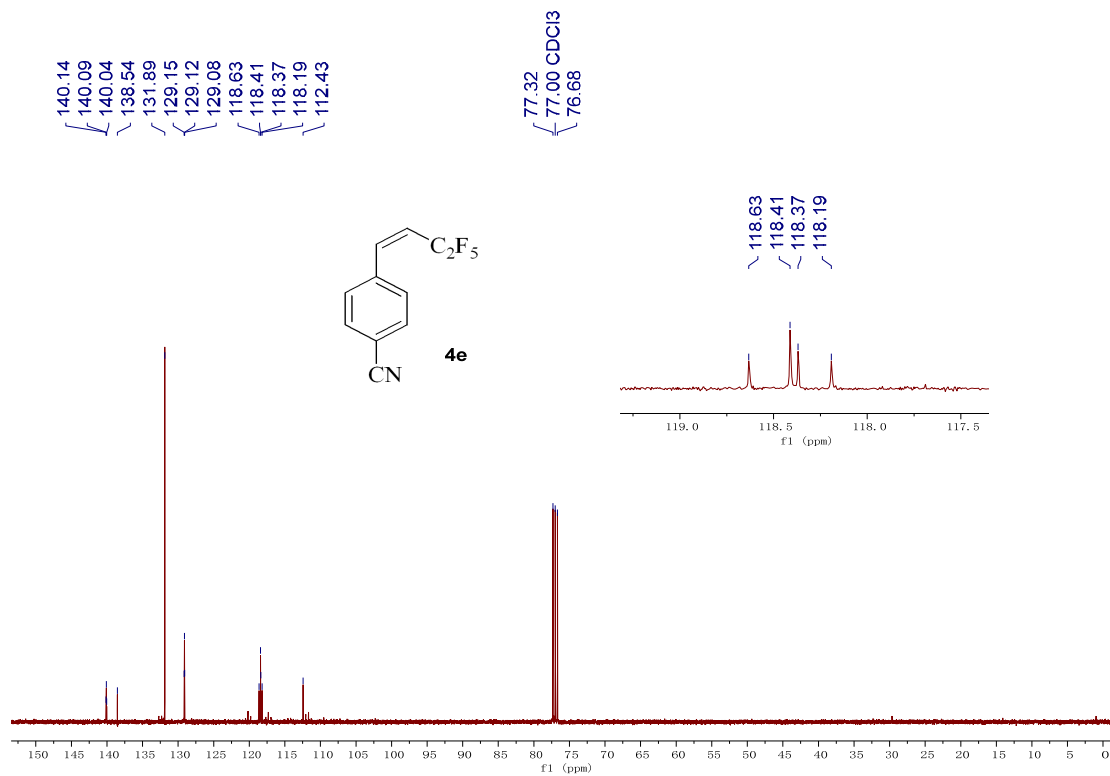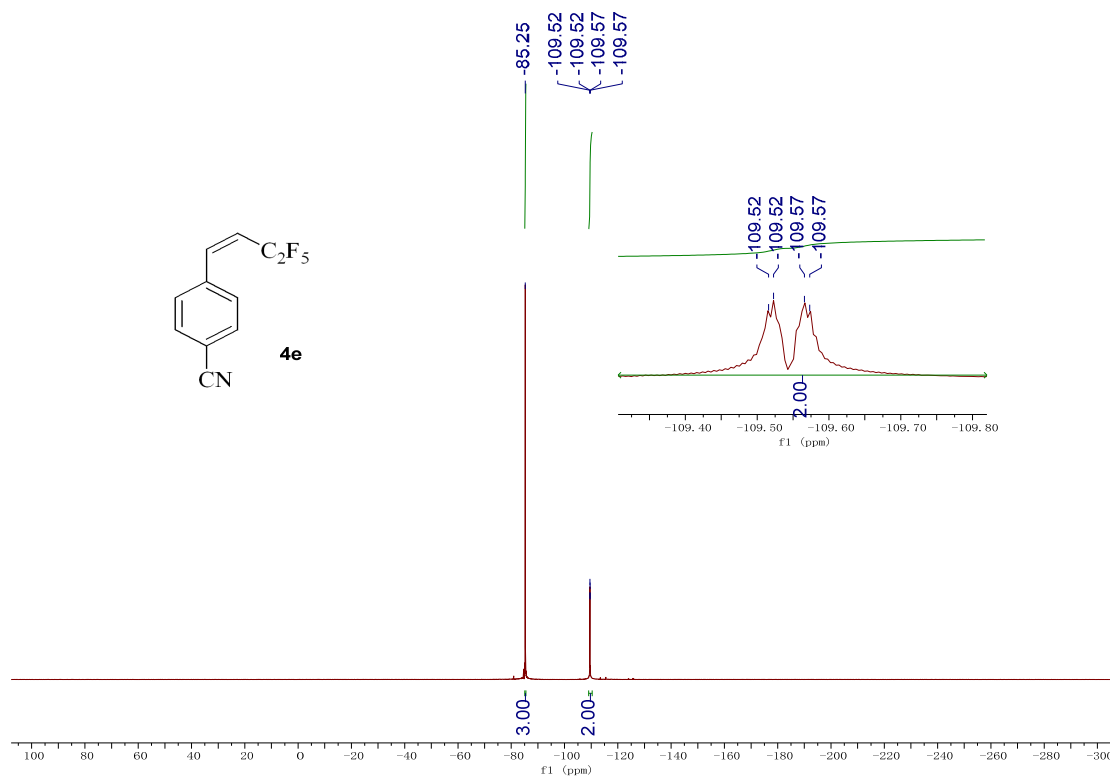

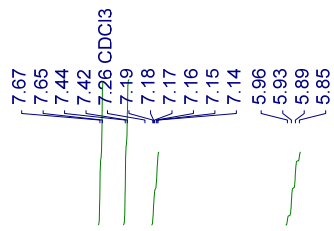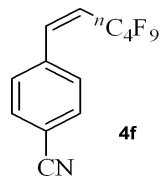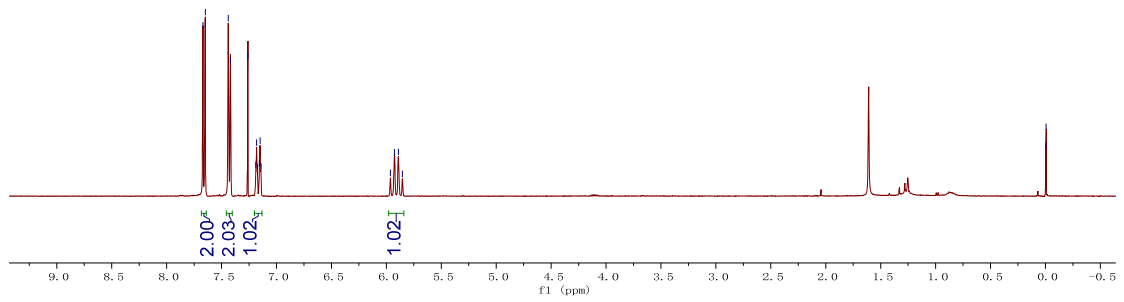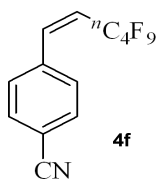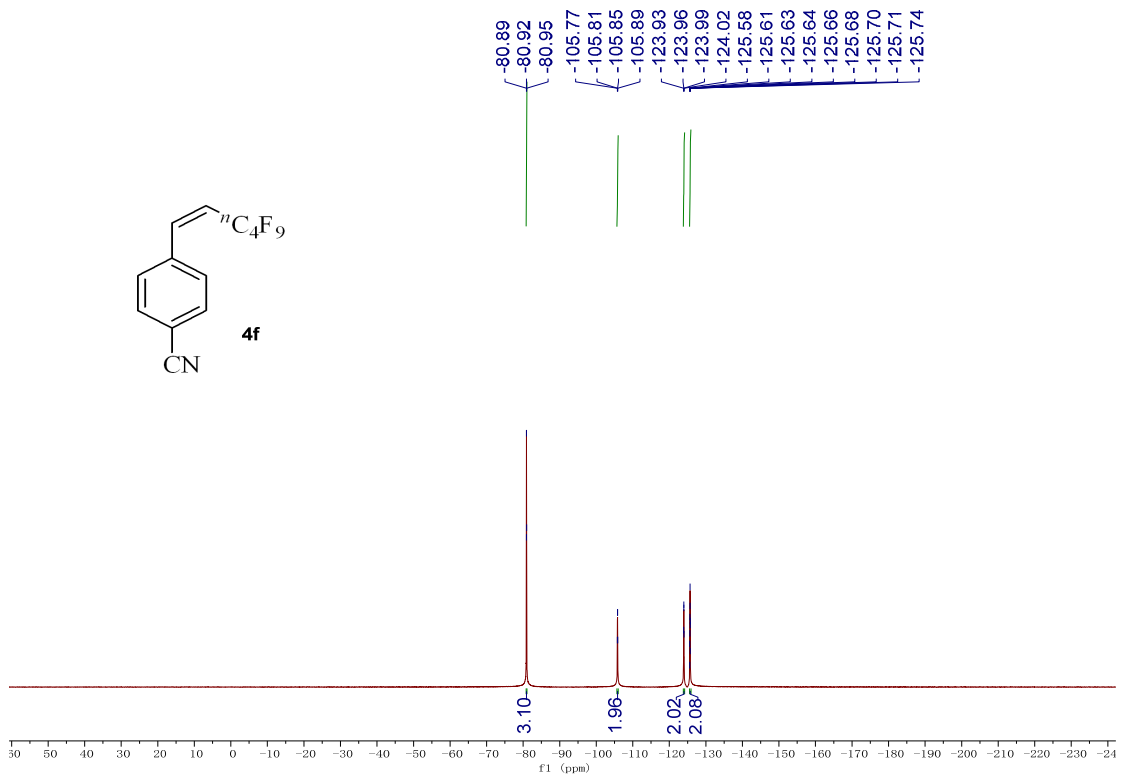

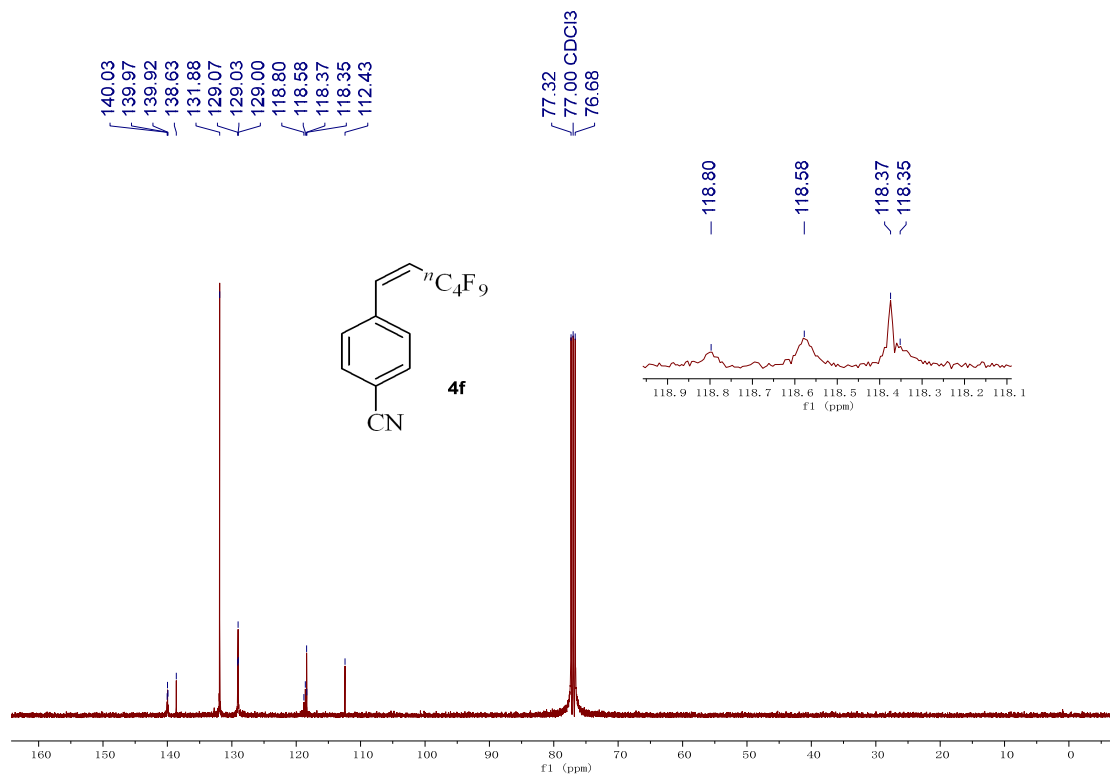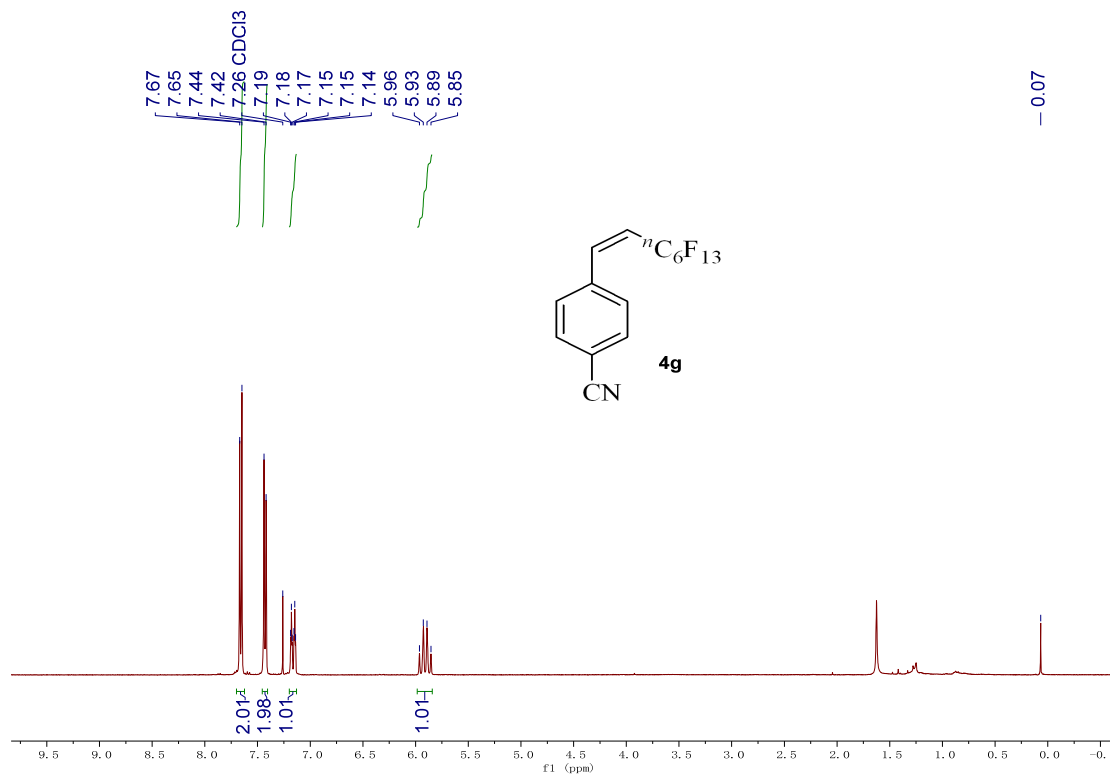

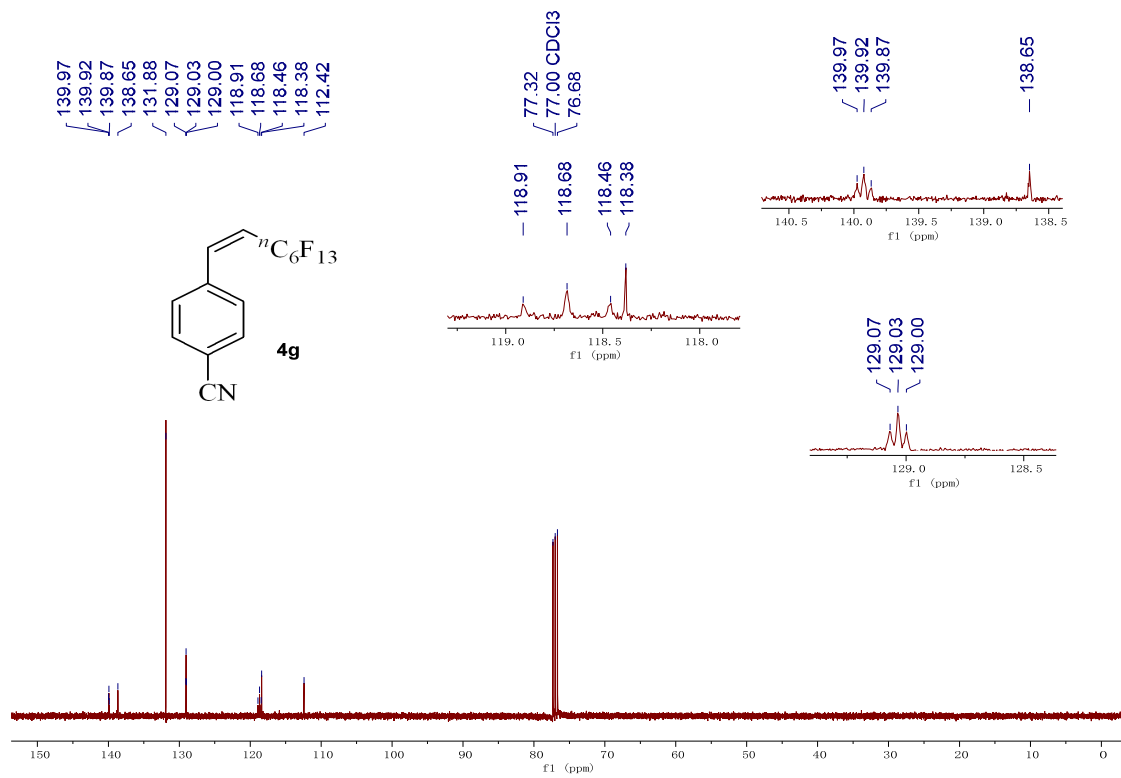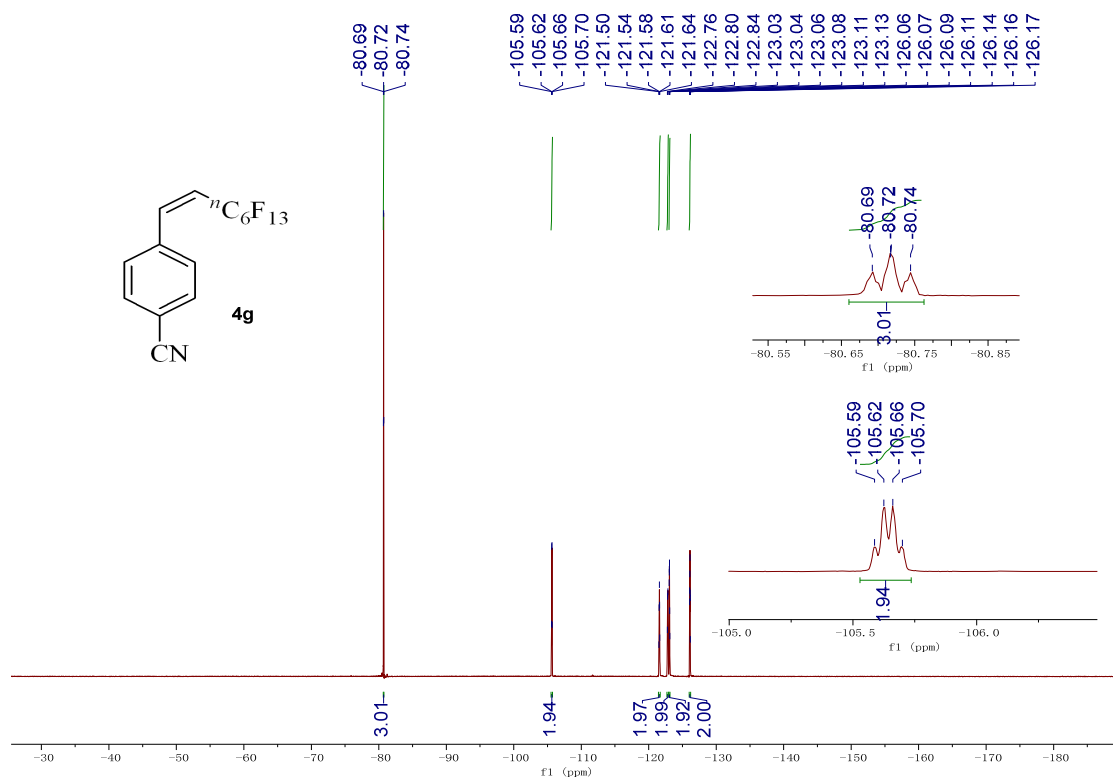

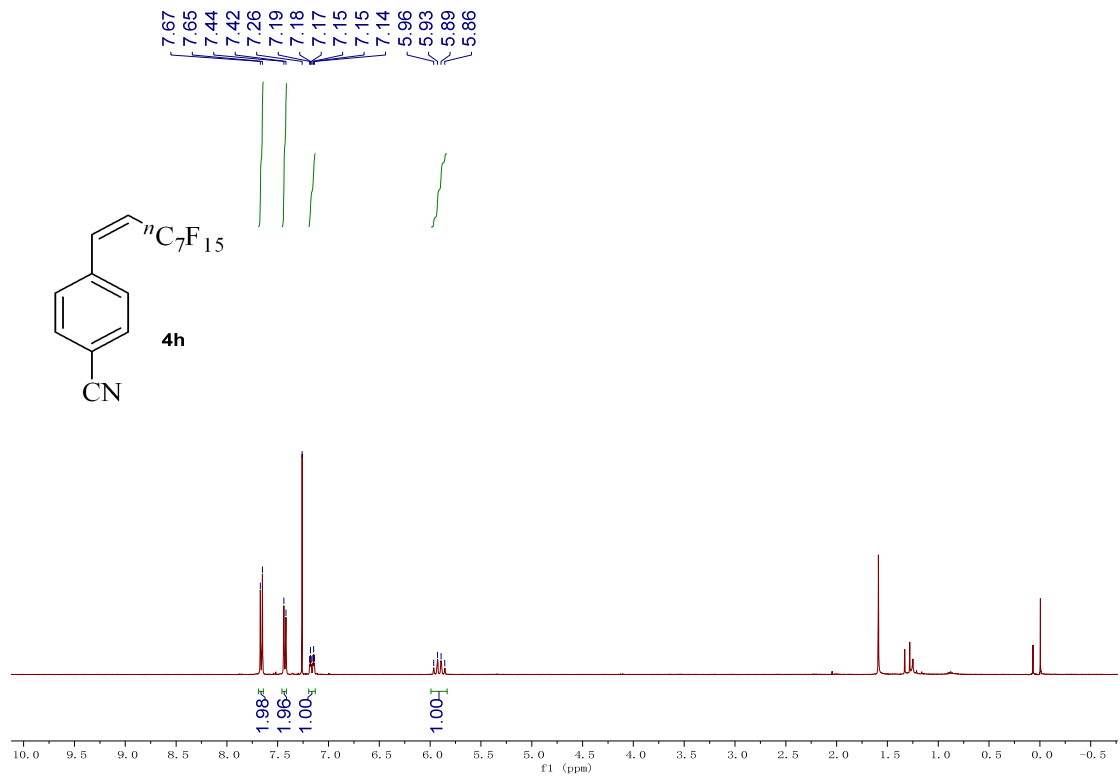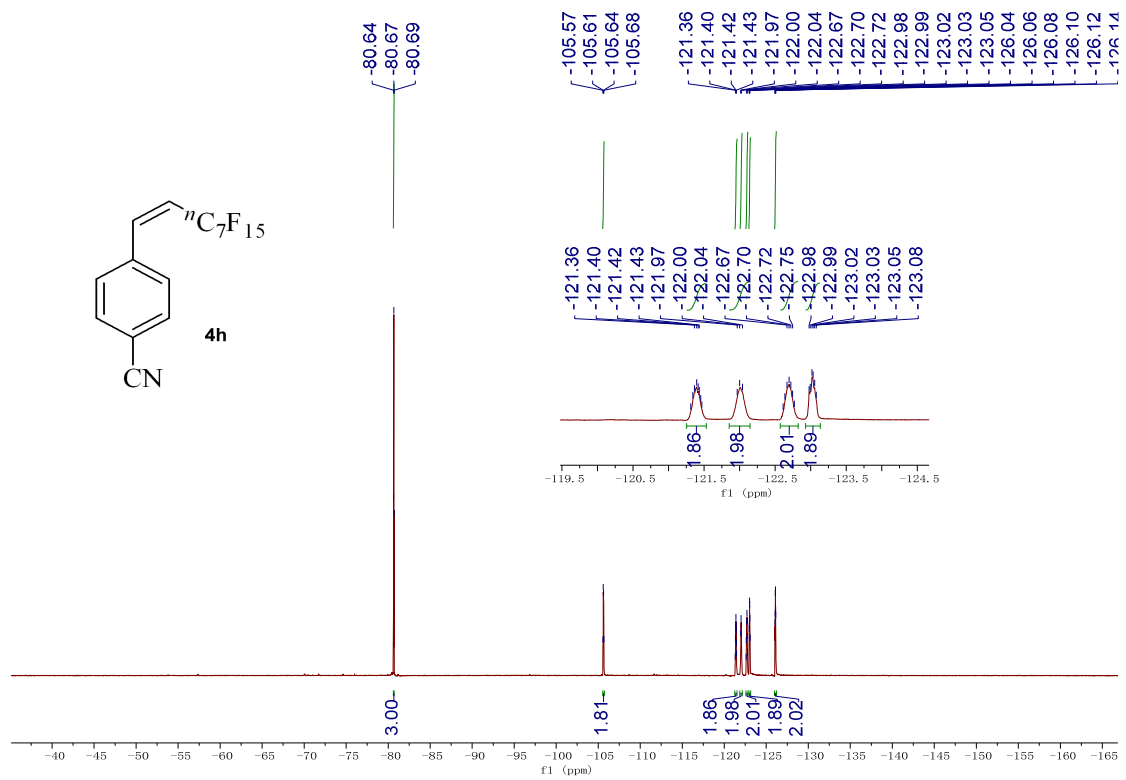

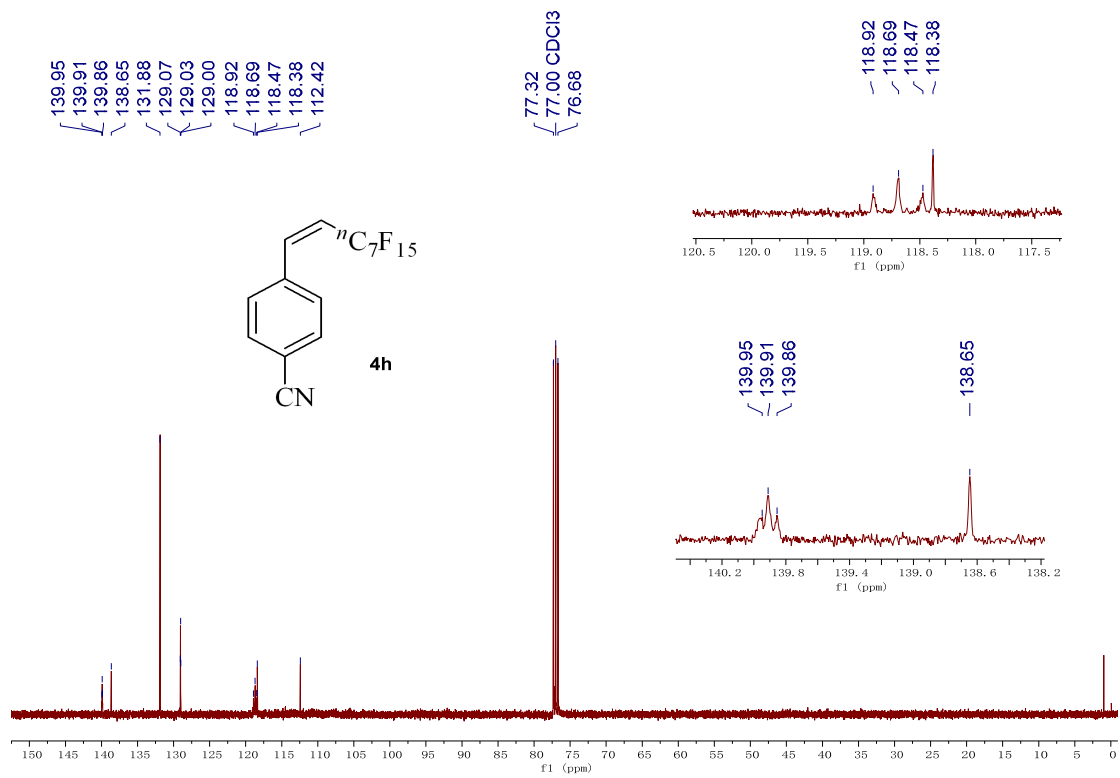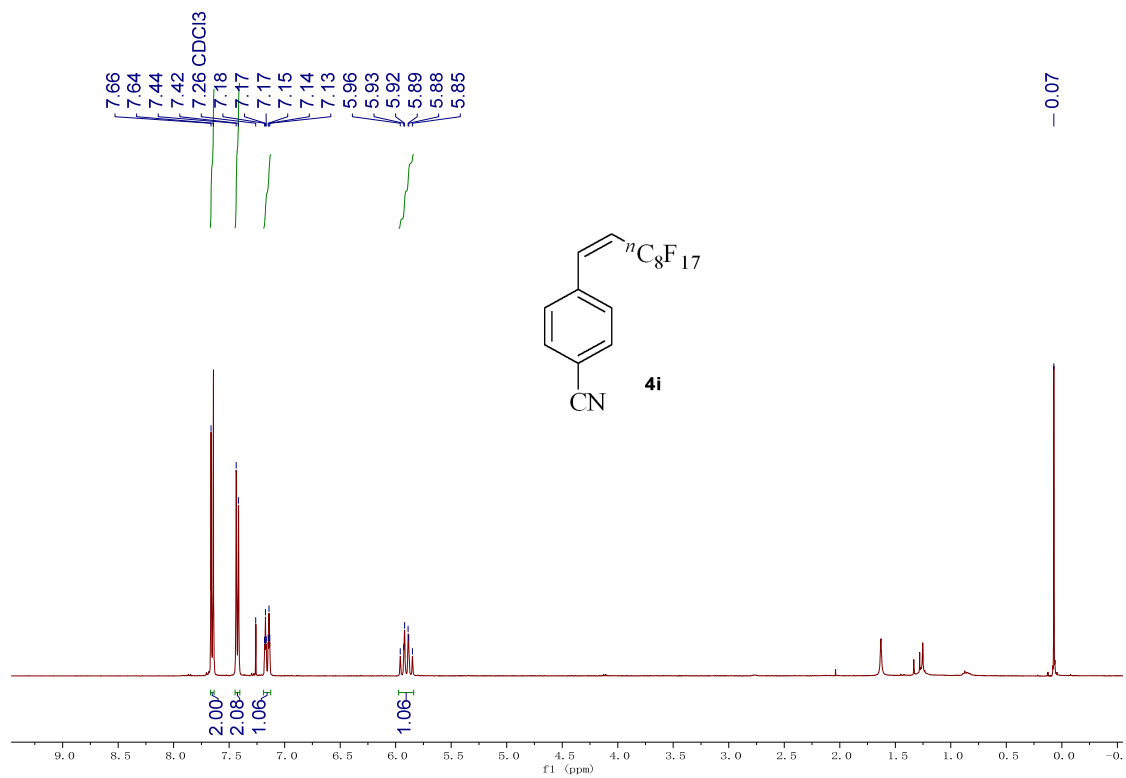



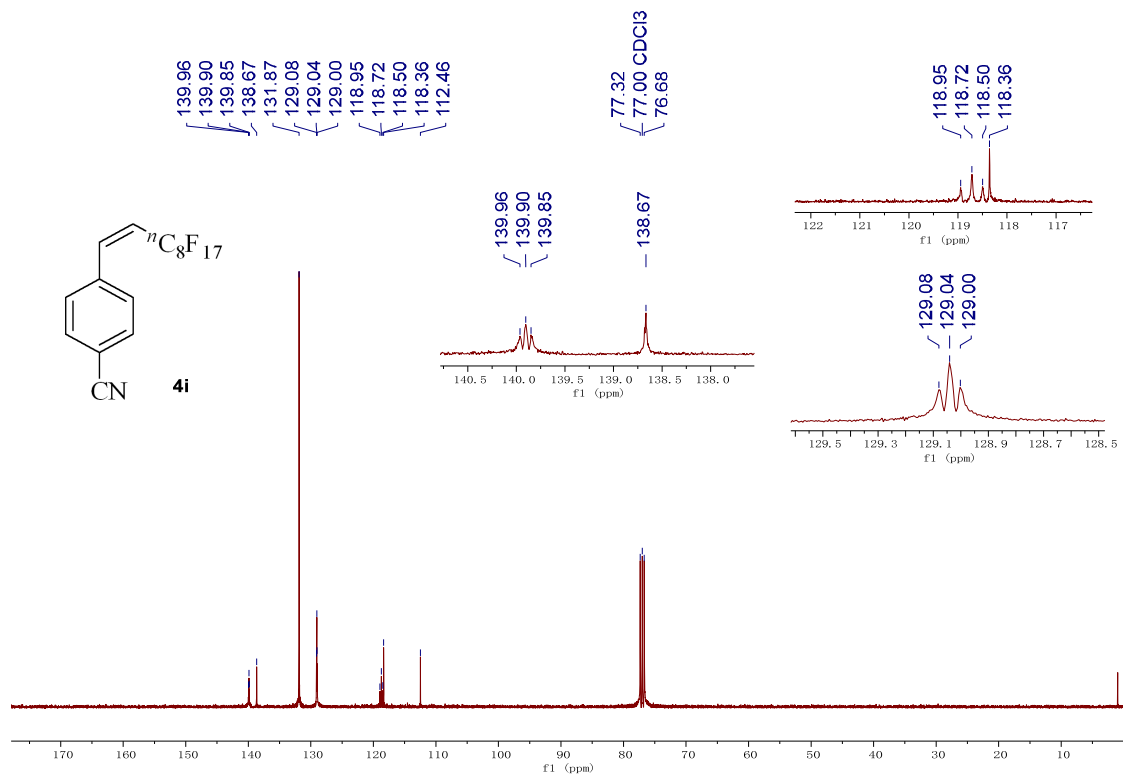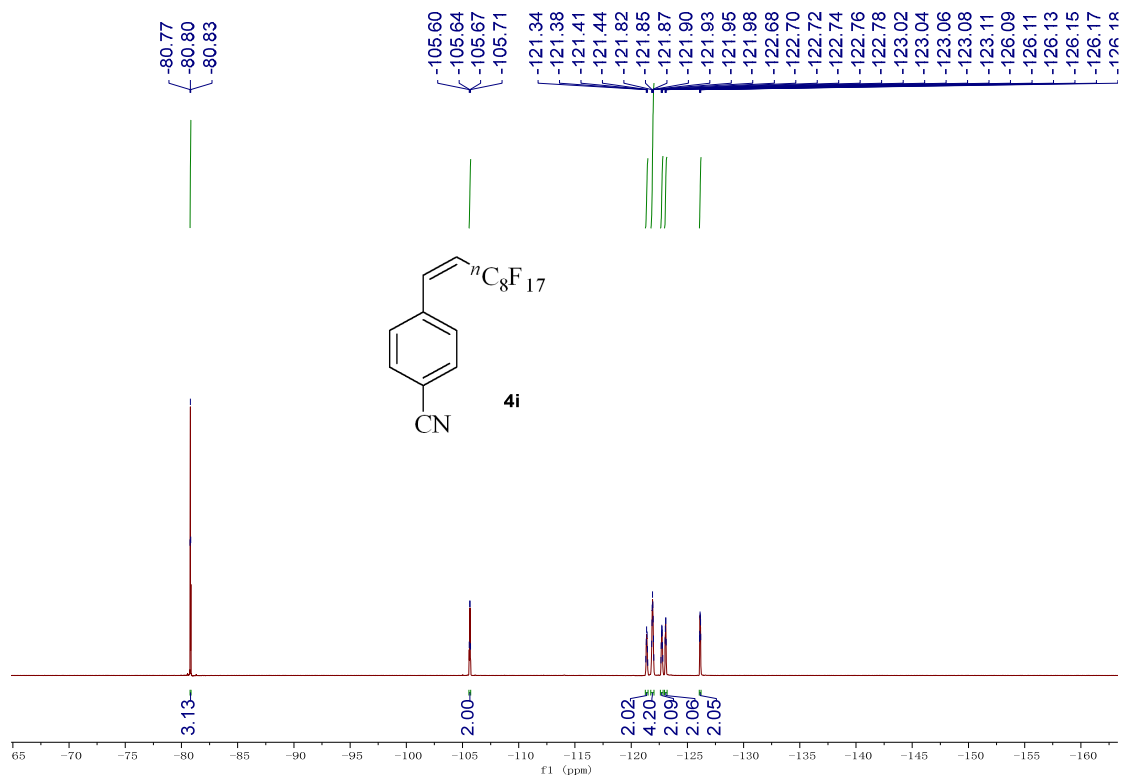

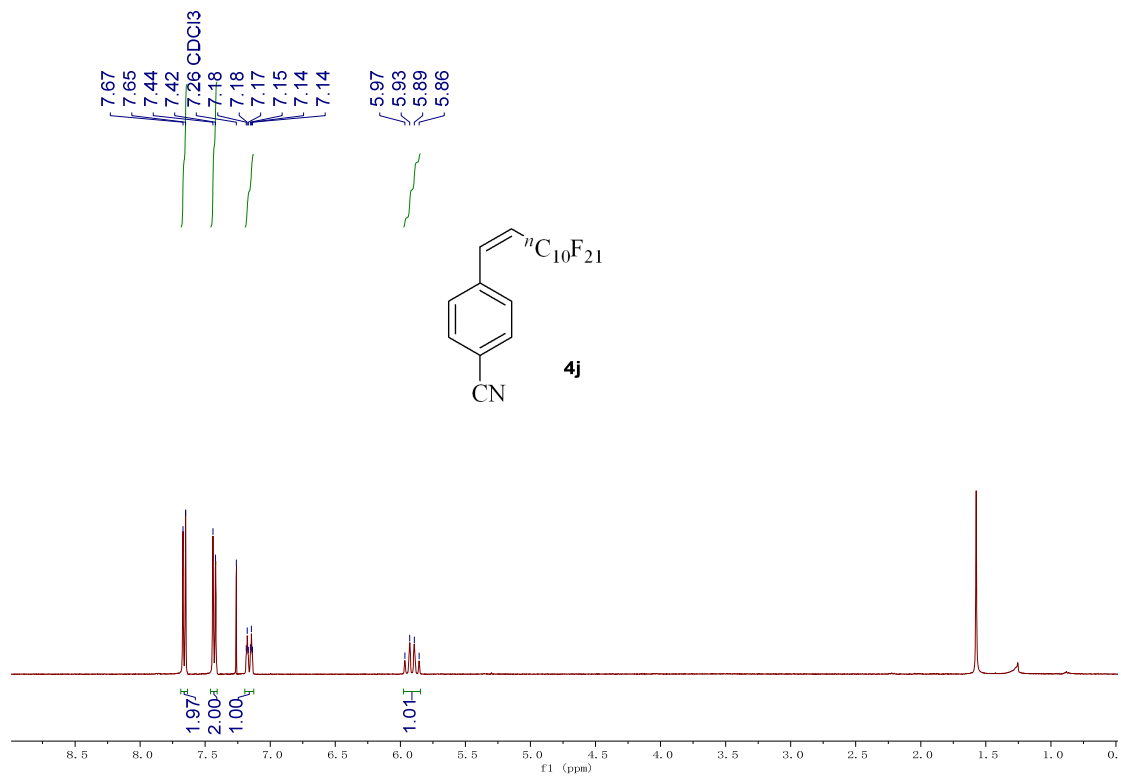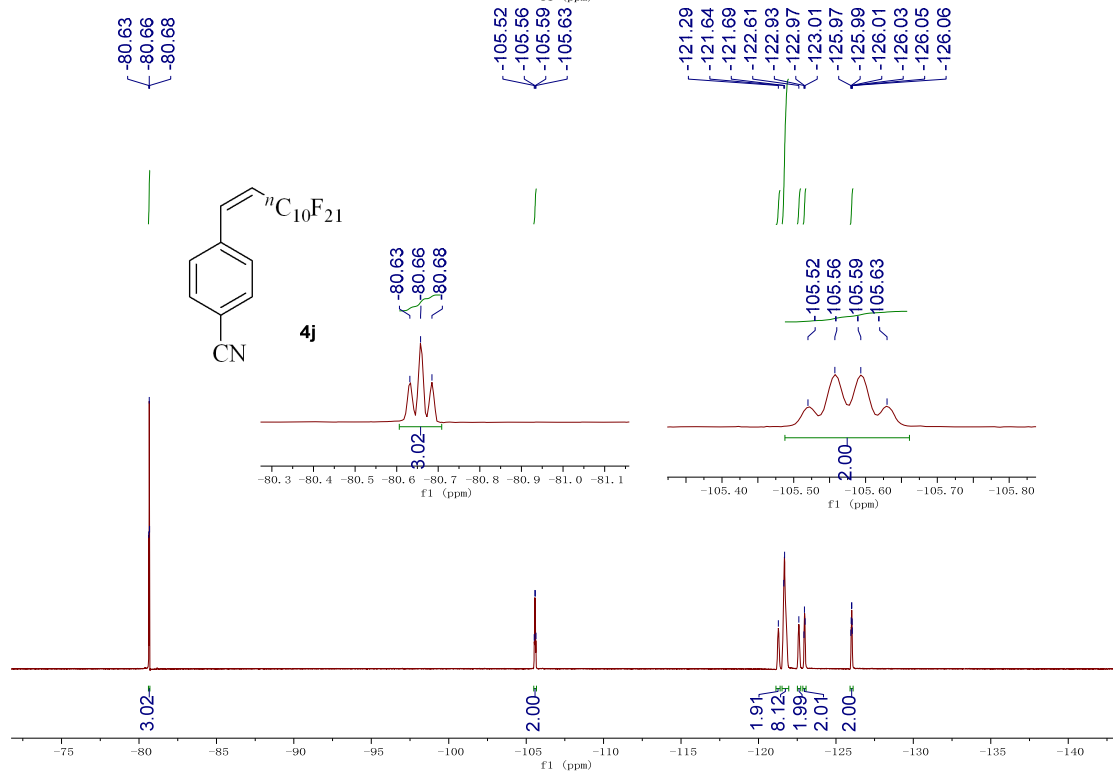

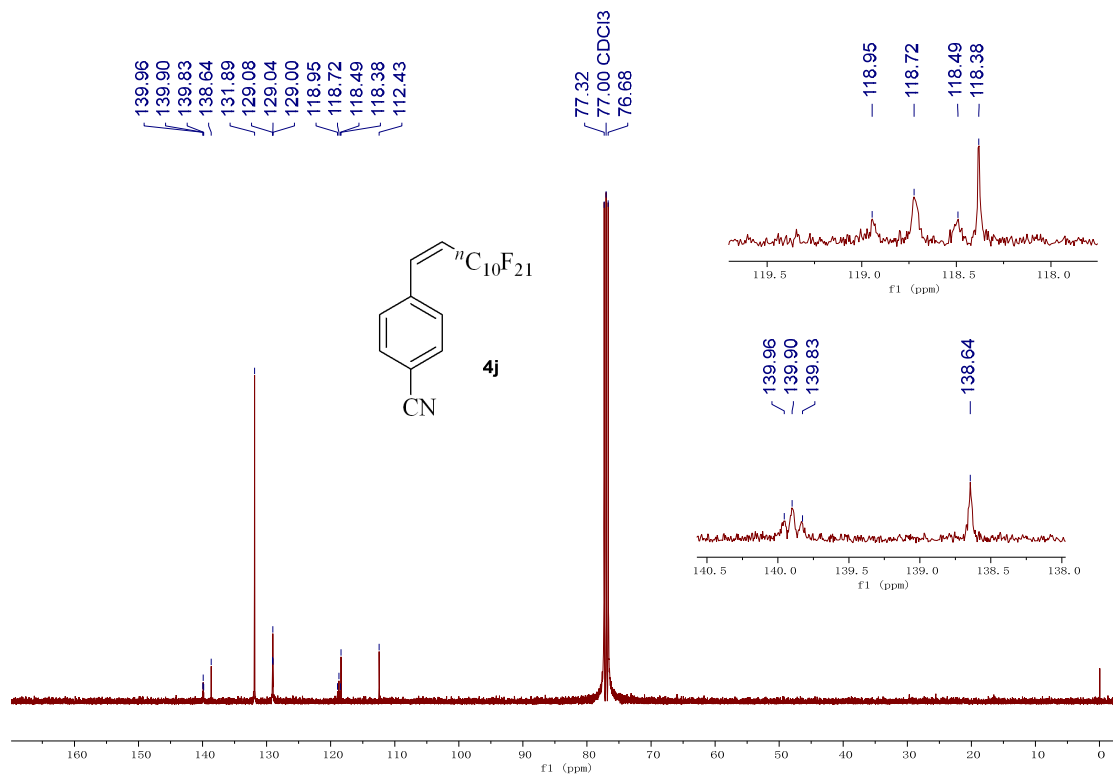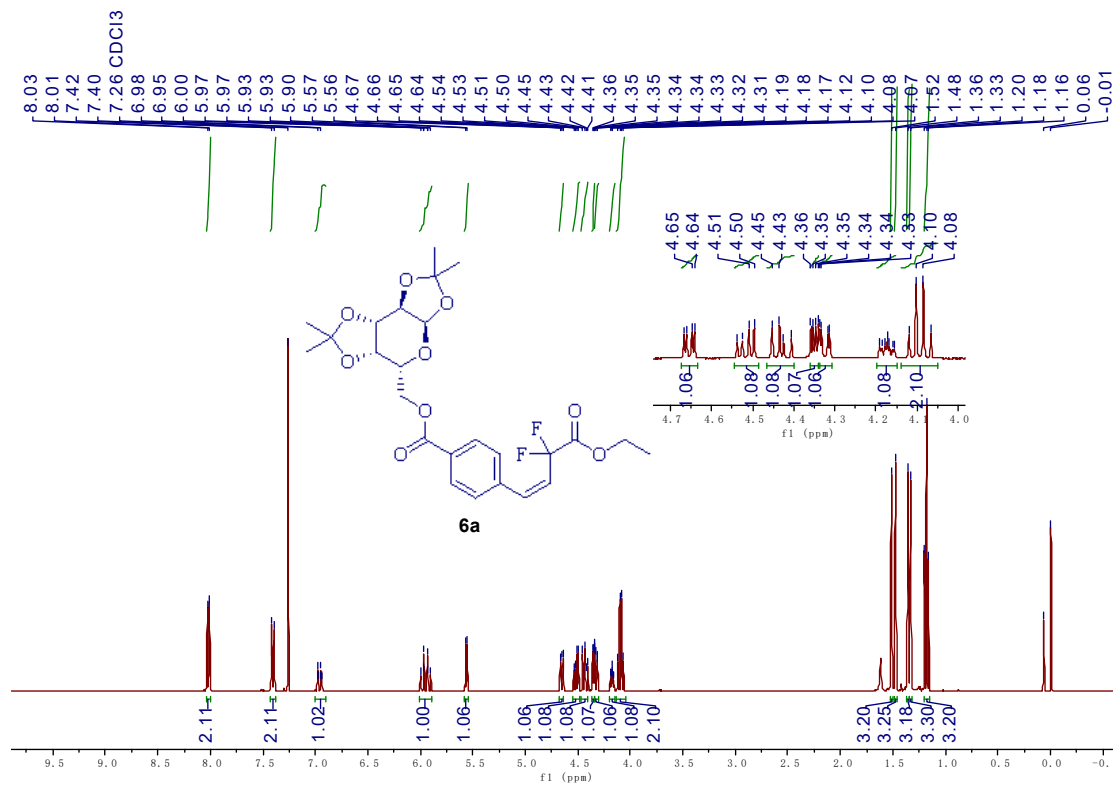

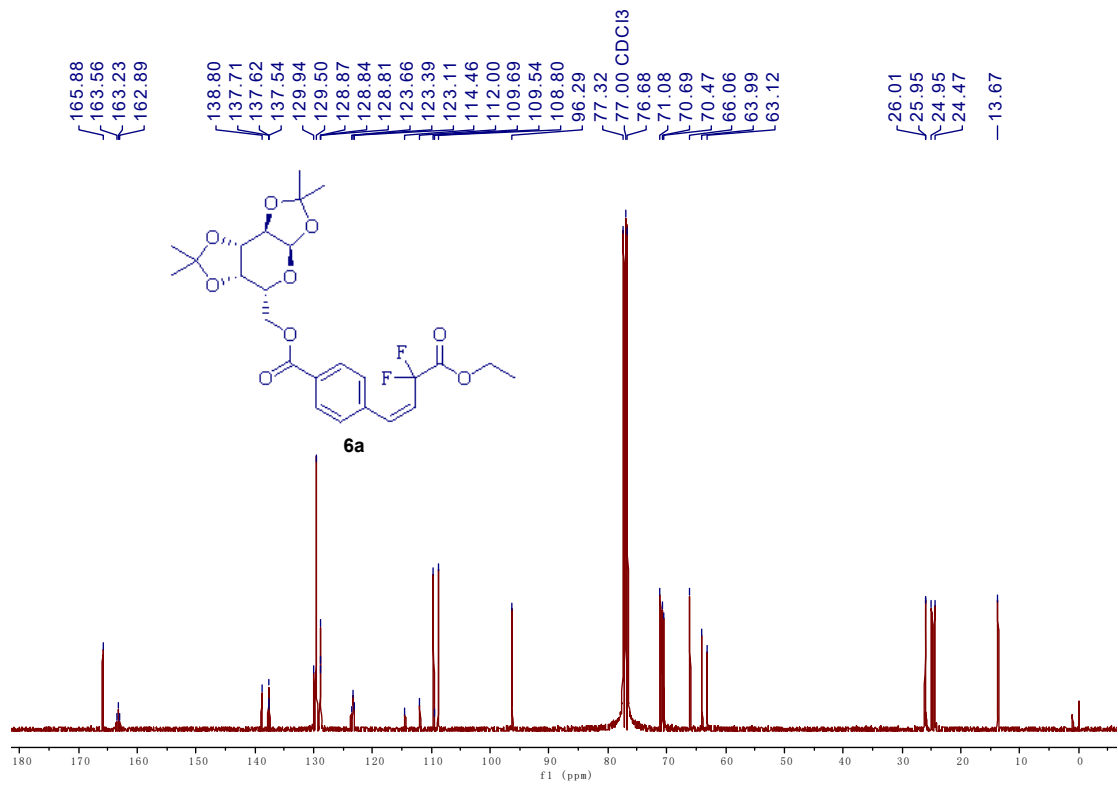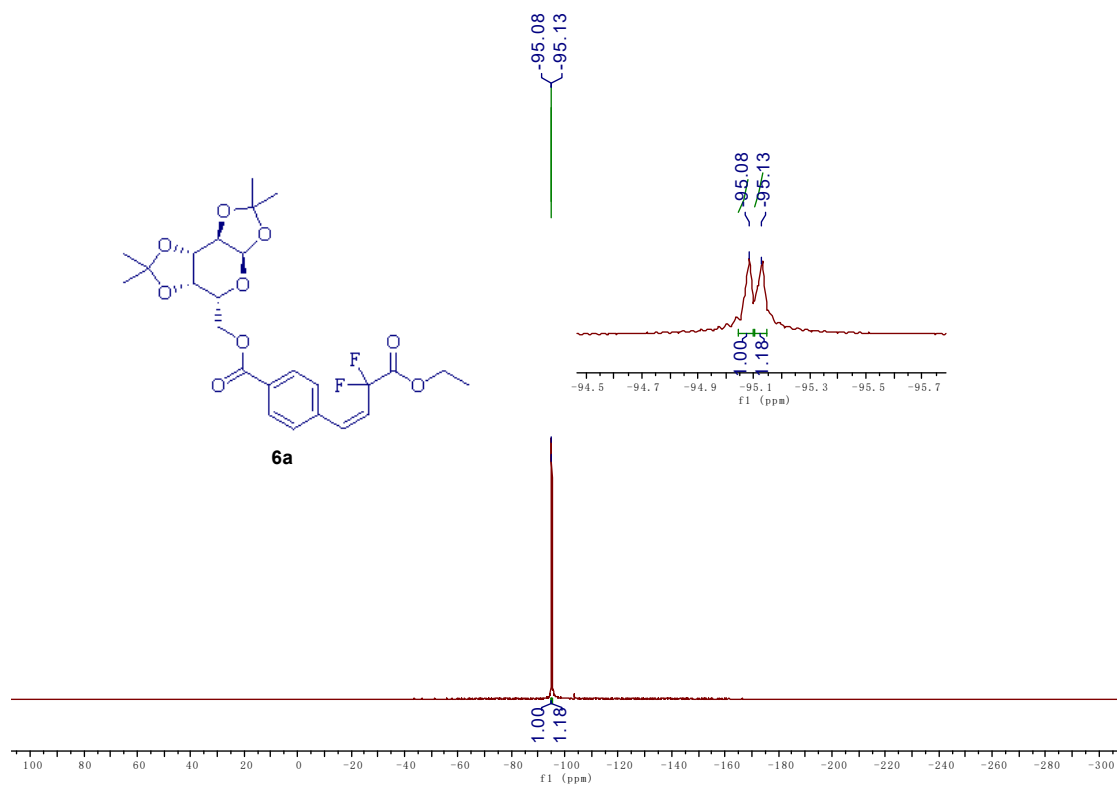

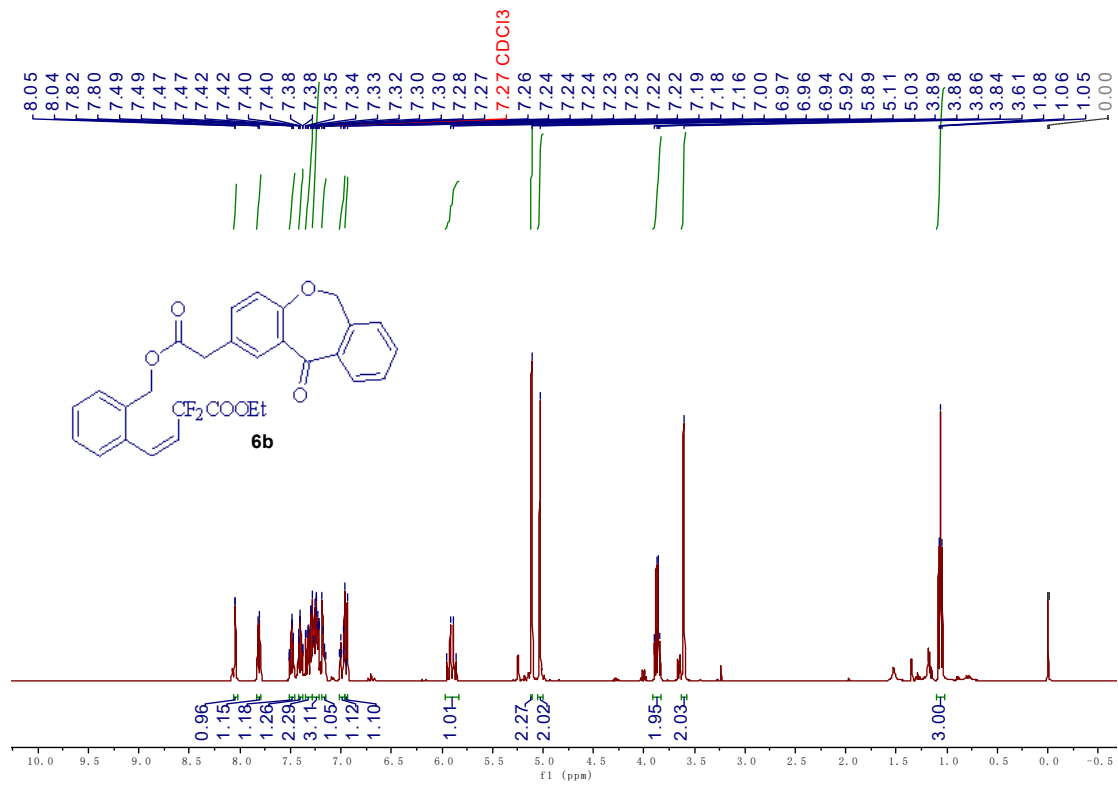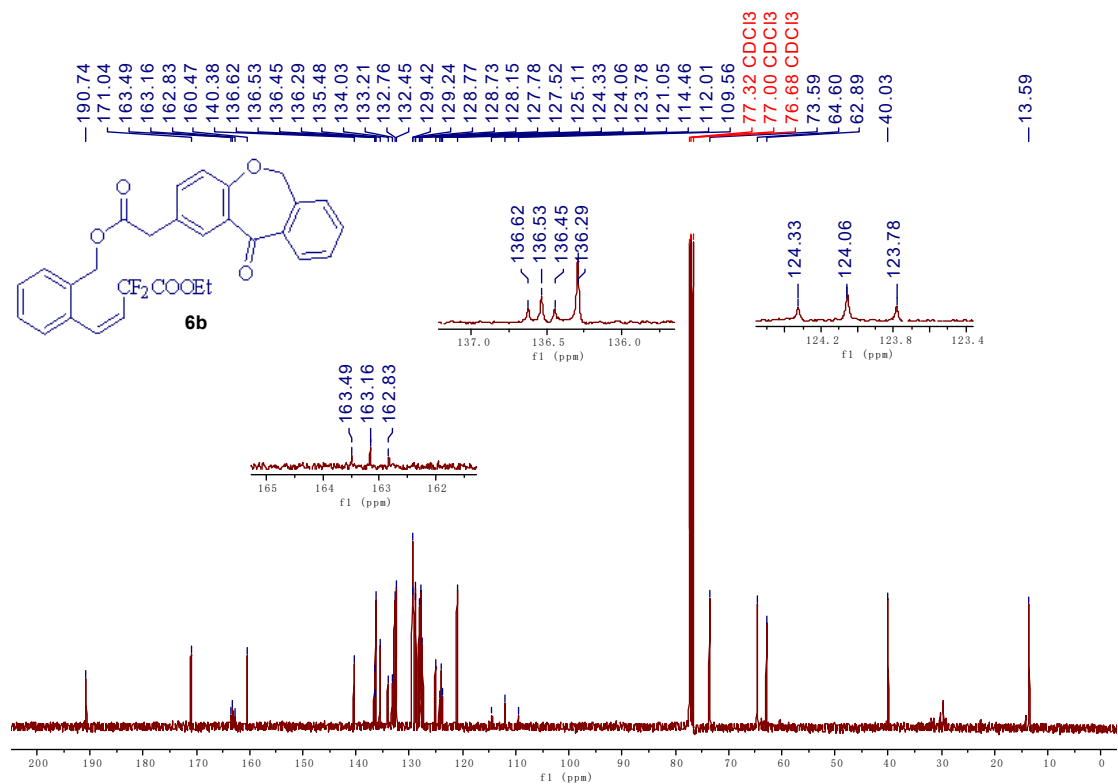

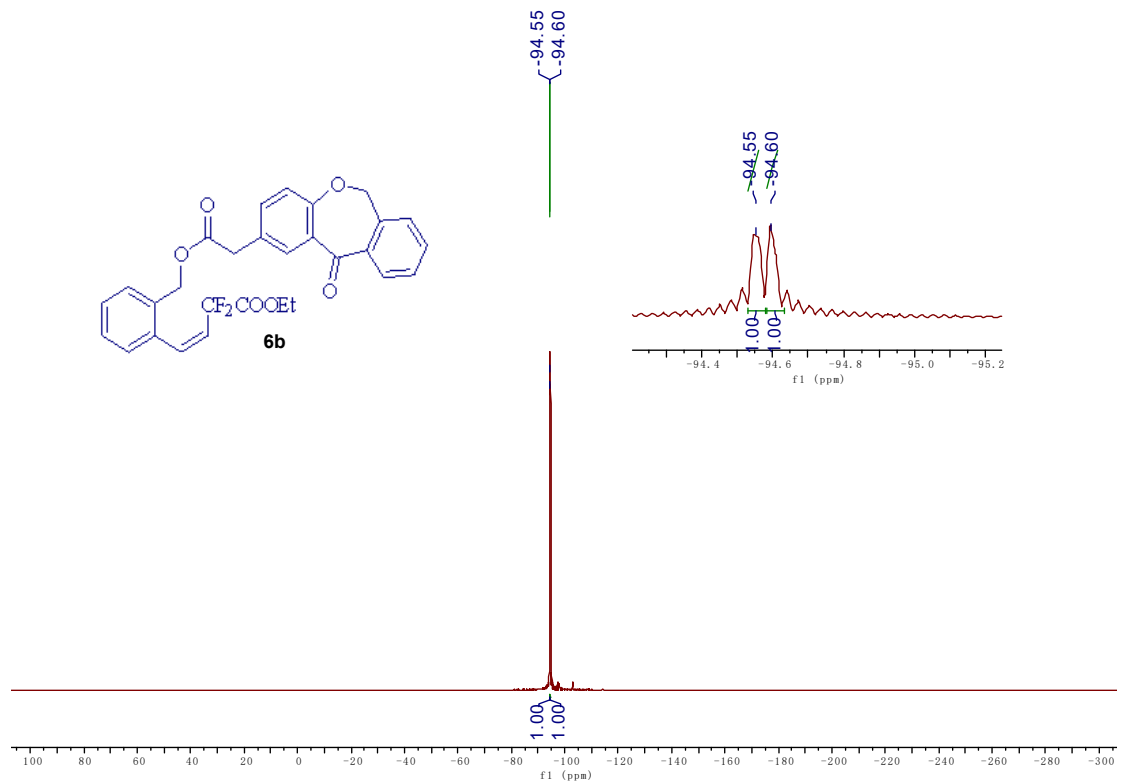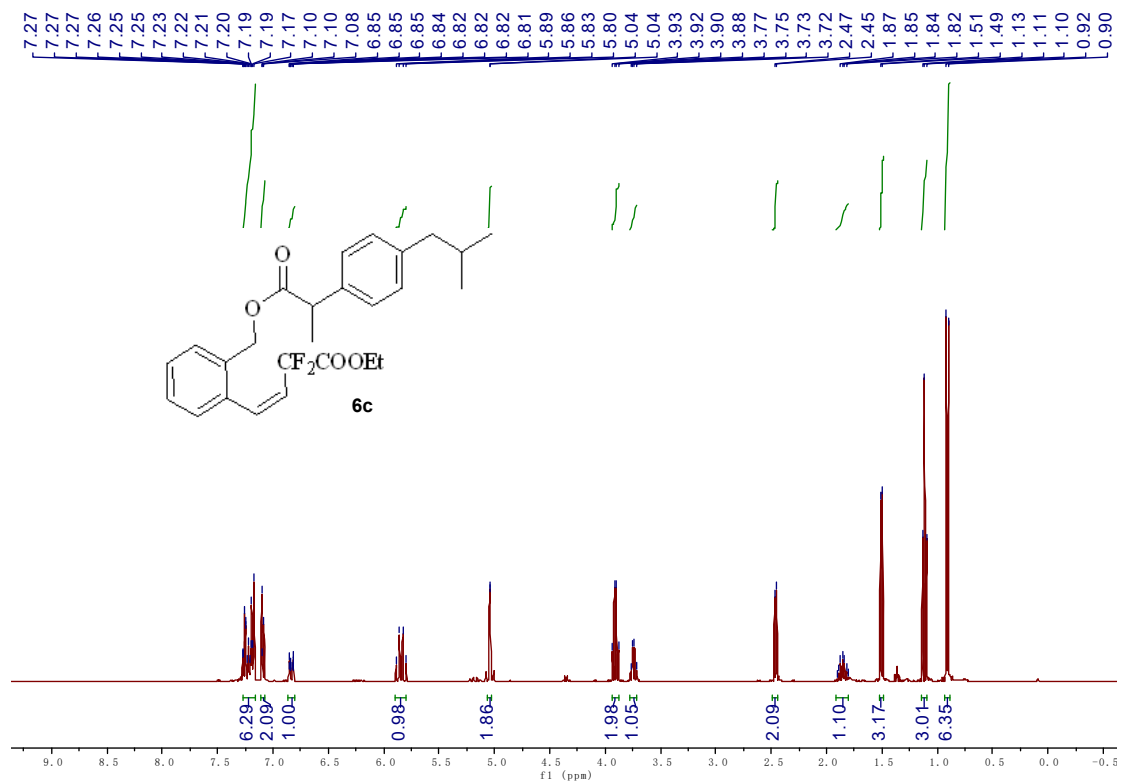

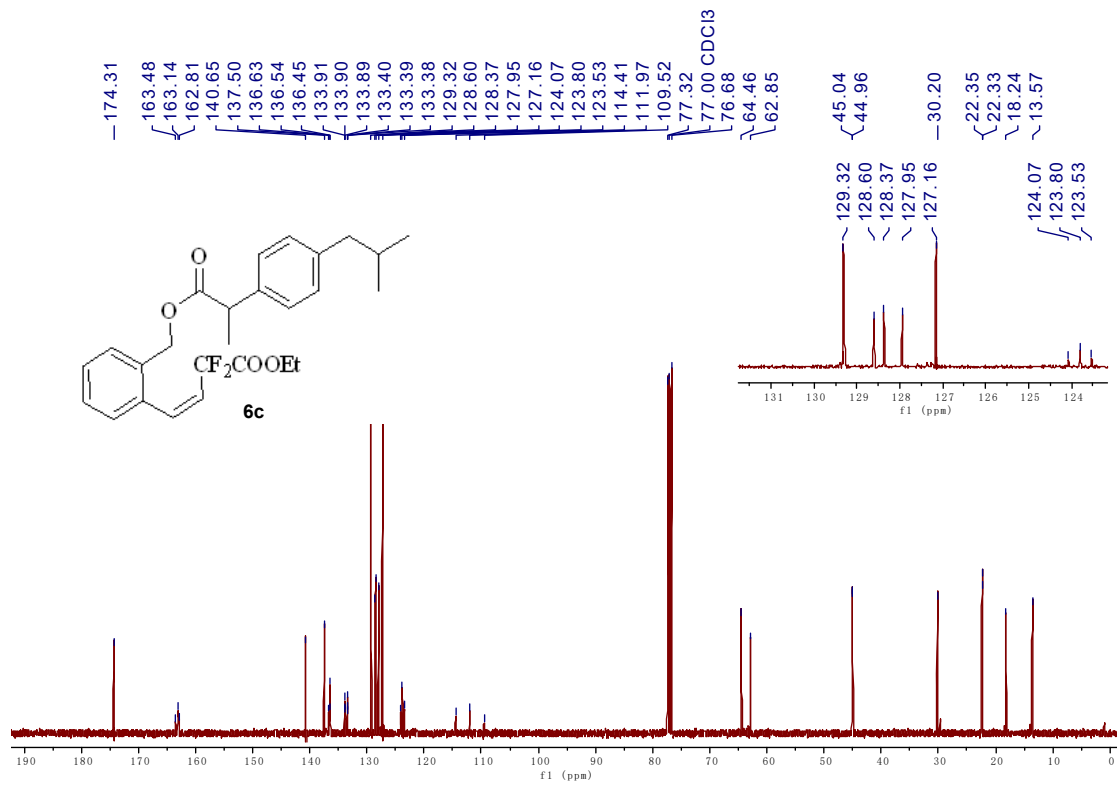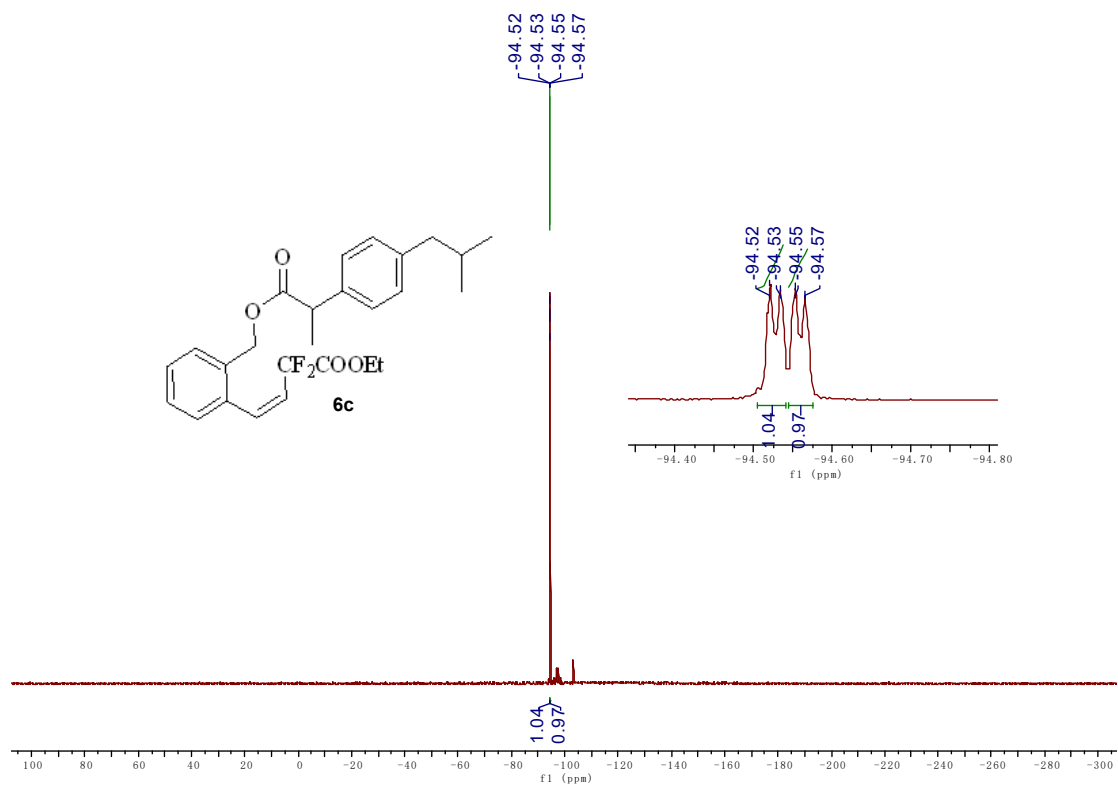

Supplement: d1qo00983d1.pdf [file d1qo00983d1.pdf]
